# Supplementary material for: Seamens’ Sign: a novel electrocardiogram prediction tool for left ventricular hypertrophy
Source: PeerJ. 2022 May 31;10:e13548. doi: 10.7717/peerj.13548 (PMC9165589; doi:10.7717/peerj.13548)
Supplement: Supplemental Information 1 [file peerj-10-13548-s001.xlsx]

## Sheet: DATA
Study ID	Age	Sex	EKG to ECHO Diff	EKG to ECHO Diff (DAYS)	Echo Order Date	LVH	EKG Order Date	EKG Uploaded	Seamens' Sign	S-L1	S-L2	Cornell Men	Cornell Women	Cornell (Scrubbed)	Seamens' IR	SL-1 IR	SL-2 IR	Cornell Men's IR	Cornell Women's IR	Cornell (Scrubbed) IR
1	60	M	33.17	33	2019-12-12 16:18:00	YES	2020-01-14 15:22:00	X	NO	NO	NO	NO		NO	NO	NO	NO	NO		NO
2	65	M	28.48	28	2019-12-17 10:48:00	YES	2020-01-14 14:44:00	X	NO	NO	YES	NO		NO
3	90	M	0.02	0	2020-01-14 12:39:00	NO	2020-01-14 09:05:00	X	NO	NO	NO	NO		NO
4	91	F	75.91	76	2019-10-30 17:26:00	NO	2020-01-14 07:42:00	X	NO	NO	NO		NO	NO
5	30	F	25.55	26	2019-12-19 17:30:00	NO	2020-01-13 21:32:00	X	NO	NO	NO		NO	NO	NO	NO	NO		NO	NO
6	49	M	28.98	29	2019-12-15 18:26:00	NO	2020-01-13 17:21:00	X	NO	NO	NO	NO		NO
7	75	M	56.73	57	2019-11-18 13:10:00	YES	2020-01-13 17:20:00	X	NO	NO	NO	NO		NO	NO	NO	NO	NO		NO
8	66	F	14.83	15	2019-12-30 23:39:00	NO	2020-01-13 16:45:00	X	NO	NO	NO		NO	NO
9	43	F	77.4	77	2019-10-29 08:27:00	YES	2020-01-13 14:33:00	X	NO	NO	NO		YES	YES
10	74	M	10.09	10	2020-01-03 16:37:00	YES	2020-01-13 14:16:00	X	NO	NO	YES	NO		NO
11	76	F	0.17	0	2020-01-13 20:30:00	NO	2020-01-13 12:45:00	X	NO	NO	NO		NO	NO
12	50	M	41.32	41	2019-12-03 08:53:00	YES	2020-01-13 12:10:00	X	NO	YES	NO	NO		NO
13	72	M	62.21	62	2019-11-12 13:27:00	NO	2020-01-13 11:35:00	X	NO	NO	NO	NO		NO
14	66	F	0.79	1	2020-01-13 15:15:00	NO	2020-01-13 10:27:00	X	NO	NO	NO		NO	NO
15	67	M	0.48	0	2020-01-13 17:39:00	NO	2020-01-13 08:42:00	X	YES	YES	NO	NO		NO	YES	NO	NO	NO		NO
16	34	M	90.06	90	2019-10-15 15:19:00	YES	2020-01-13 08:25:00	X	NO	NO	NO	NO		NO
17	68	M	31.08	31	2019-12-13 08:16:00	NO	2020-01-13 07:40:00	X	YES	NO	YES	YES		YES
18	81	M	0.46	0	2020-01-13 11:02:00	YES	2020-01-13 06:50:00	X	NO	NO	NO	NO		NO
19	51	M	1.03	1	2020-01-13 12:04:00	NO	2020-01-13 06:23:00	X	NO	NO	NO	NO		NO
20	84	F	0.06	0	2020-01-13 08:44:00	NO	2020-01-13 04:06:00	X	NO	NO	NO		NO	NO
21	54	F	3.32	3	2020-01-09 21:17:00	NO	2020-01-13 00:27:00	X	NO	NO	NO		NO	NO	NO	NO	NO		NO	NO
22	79	F	0.14	0	2020-01-13 04:22:00	YES	2020-01-12 21:42:00	X	NO	NO	NO		NO	NO
23	81	F	0.02	0	2020-01-12 21:30:00	NO	2020-01-12 20:49:00	X	NO	NO	NO		NO	NO
24	60	M	0.02	0	2020-01-13 02:42:00	YES	2020-01-12 20:08:00	X	NO	NO	NO	NO		NO
25	35	F	0.02	0	2020-01-12 22:36:00	NO	2020-01-12 19:46:00	X	NO	NO	NO		YES	YES
26	72	F	0.93	1	2020-01-12 22:19:00	NO	2020-01-12 18:31:00	X	NO	NO	NO		NO	NO
27	52	F	0.87	1	2020-01-13 14:39:00	NO	2020-01-12 16:37:00	X	NO	NO	NO		NO	NO
28	89	M	48.27	48	2019-11-25 15:04:00	YES	2020-01-12 16:27:00	X	NO	NO	NO	NO		NO
29	55	M	0.13	0	2020-01-12 14:37:00	NO	2020-01-12 15:05:00	X	NO	NO	NO	NO		NO
30	55	M	12.31	12	2019-12-31 12:01:00	NO	2020-01-12 13:45:00	X	NO	NO	NO	NO		NO
31	86	M	13.17	13	2019-12-30 16:58:00	YES	2020-01-12 11:36:00	X	NO	NO	NO	NO		NO
32	55	F	0.01	0	2020-01-12 18:27:00	NO	2020-01-12 11:18:00	X	NO	NO	NO		NO	NO
33	87	F	0.14	0	2020-01-12 12:51:00	YES	2020-01-12 10:49:00	X	NO	NO	NO		NO	NO
34	38	M	0.24	0	2020-01-12 12:03:00	NO	2020-01-12 10:10:00	X	NO	NO	NO	NO		NO
35	63	F	13.19	13	2019-12-30 09:57:00	YES	2020-01-12 08:11:00	X	NO	NO	NO		NO	NO
36	56	M	43.07	43	2019-11-30 12:14:00	NO	2020-01-12 04:46:00	X	NO	NO	NO	NO		NO
37	64	M	0.15	0	2020-01-12 11:37:00	NO	2020-01-12 00:32:00	X	NO	NO	NO	NO		NO
38	75	M	1.5	2	2020-01-13 15:05:00	NO	2020-01-12 00:12:00	X	NO	NO	NO	NO		NO
39	77	M	0.02	0	2020-01-12 00:19:00	YES	2020-01-12 00:07:00	X	NO	NO	YES	NO		NO
40	72	M	0.38	0	2020-01-12 11:53:00	NO	2020-01-11 23:54:00	X	NO	NO	NO	NO		NO
41	51	M	1.36	1	2020-01-13 09:56:00	NO	2020-01-11 23:30:00	X	NO	NO	NO	NO		NO
42	81	M	0.05	0	2020-01-11 22:42:00	NO	2020-01-11 17:08:00	X	NO	NO	NO	NO		NO
43	59	M	0.29	0	2020-01-12 03:48:00	NO	2020-01-11 15:31:00	X	NO	NO	NO	NO		NO
44	87	F	0.11	0	2020-01-11 19:34:00	YES	2020-01-11 14:45:00	X	NO	NO	NO		NO	NO
45	54	F	0.14	0	2020-01-11 14:08:00	NO	2020-01-11 13:27:00	X	NO	NO	NO		NO	NO
46	73	F	0.09	0	2020-01-11 14:54:00	NO	2020-01-11 12:53:00	X	NO	NO	NO		NO	NO
47	69	F	0.17	0	2020-01-11 19:05:00	NO	2020-01-11 12:22:00	X	NO	NO	NO		NO	NO
48	47	F	0.37	0	2020-01-11 19:43:00	YES	2020-01-11 11:54:00	X	NO	NO	NO		NO	NO	NO	NO	NO		NO	NO
49	87	F	87.64	88	2019-10-16 00:27:00	NO	2020-01-11 05:50:00	X	NO	NO	NO		NO	NO	NO	NO	NO		NO	NO
50	20	F	0.08	0	2020-01-11 08:18:00	NO	2020-01-11 02:36:00	X	NO	NO	NO		NO	NO	NO	NO	NO		NO	NO
51	65	M	17.42	17	2019-12-25 09:00:00	NO	2020-01-11 02:34:00	X	NO	NO	NO	NO		NO
52	37	F	0.91	1	2020-01-12 08:43:00	NO	2020-01-10 23:53:00	X	NO	NO	NO		NO	NO
53	65	M	0.33	0	2020-01-10 21:56:00	NO	2020-01-10 22:17:00	X	NO	NO	YES	NO		NO
54	87	F	0.38	0	2020-01-11 15:17:00	YES	2020-01-10 19:44:00	X	NO	NO	YES		YES	YES	NO	NO	YES		YES	YES
55	54	M	0.73	1	2020-01-11 16:53:00	NO	2020-01-10 18:05:00	X	NO	NO	NO	NO		NO
56	66	M	0.02	0	2020-01-11 02:43:00	NO	2020-01-10 16:43:00	X	NO	NO	YES	NO		NO
57	71	F	0.27	0	2020-01-10 19:19:00	NO	2020-01-10 15:25:00	X	NO	NO	NO		NO	NO
58	91	F	7.39	7	2020-01-03 14:07:00	YES	2020-01-10 15:11:00	X	NO	NO	NO		YES	YES
59	86	M	0.28	0	2020-01-10 21:45:00	NO	2020-01-10 15:11:00	X	NO	NO	NO	NO		NO
60	65	F	0.07	0	2020-01-10 23:45:00	NO	2020-01-10 14:36:00	X	NO	NO	NO		YES	YES
61	65	M	10.45	10	2019-12-31 08:36:00	YES	2020-01-10 14:33:00	X	NO	NO	NO	NO		NO
62	38	M	29.32	29	2019-12-12 10:02:00	NO	2020-01-10 11:02:00	X	NO	NO	NO	NO		NO
63	50	F	19.18	19	2019-12-22 15:27:00	YES	2020-01-10 10:25:00	X	NO	NO	NO		NO	NO
64	46	F	0.07	0	2020-01-10 17:03:00	NO	2020-01-10 09:16:00	X	NO	NO	NO		NO	NO
65	79	F	0.4	0	2020-01-10 06:36:00	NO	2020-01-10 04:01:00	X	NO	NO	NO		NO	NO
66	70	M	85.7	86	2019-10-16 20:46:00	NO	2020-01-09 23:27:00	X	NO	NO	NO	NO		NO	NO	NO	NO	NO		NO
67	52	F	0.15	0	2020-01-10 07:36:00	NO	2020-01-09 22:07:00	X	NO	NO	NO		NO	NO	NO	NO	NO		NO	NO
68	88	M	1.55	2	2020-01-12 09:29:00	NO	2020-01-09 20:21:00	X	YES	NO	NO	NO		NO
69	68	M	43.27	43	2019-11-28 00:08:00	YES	2020-01-09 19:00:00	X	NO	NO	NO	NO		NO
70	61	M	0.02	0	2020-01-09 22:09:00	NO	2020-01-09 17:14:00	X	NO	NO	NO	NO		NO
71	39	F	70.4	70	2019-10-31 12:13:00	NO	2020-01-09 17:10:00	X	YES	NO	NO		NO	NO
72	54	F	0.68	1	2020-01-09 21:17:00	NO	2020-01-09 13:46:00	X	NO	NO	NO		YES	YES
73	91	M	69.28	69	2019-11-01 18:20:00	YES	2020-01-09 13:44:00	X	NO	NO	NO	NO		NO	NO	NO	NO	NO		NO
74	42	M	0.85	1	2020-01-10 17:37:00	YES	2020-01-09 11:58:00	X	NO	NO	NO	NO		NO
75	76	F	0.04	0	2020-01-09 17:55:00	NO	2020-01-09 11:20:00	X	NO	NO	YES		YES	YES
76	57	M	50.29	50	2019-11-20 09:47:00	YES	2020-01-09 10:02:00	X	YES	NO	YES	YES		YES
77	50	F	23.11	23	2019-12-17 12:07:00	NO	2020-01-09 08:37:00	X	NO	NO	NO		NO	NO
78	61	M	1.11	1	2020-01-09 14:18:00	NO	2020-01-09 08:20:00	X	NO	NO	NO	NO		NO
79	68	F	44.26	44	2019-11-26 14:06:00	NO	2020-01-09 06:46:00	X	NO	NO	NO		NO	NO	NO	NO	NO		NO	NO
80	34	F	0.38	0	2020-01-10 06:01:00	YES	2020-01-09 05:25:00	X	NO	NO	NO		NO	NO
81	70	M	0.21	0	2020-01-09 12:41:00	YES	2020-01-09 01:36:00	X	NO	NO	NO	NO		NO
82	66	M	0.55	1	2020-01-09 21:03:00	YES	2020-01-08 23:46:00	X	NO	YES	NO	NO		NO	NO	YES	NO	NO		NO
83	89	F	0.02	0	2020-01-09 06:01:00	NO	2020-01-08 23:22:00	X	NO	NO	NO		YES	YES
84	83	M	45.09	45	2019-11-25 09:38:00	NO	2020-01-08 19:53:00	X	NO	NO	YES	YES		YES	NO	NO	NO	NO		NO
85	63	F	17.01	17	2019-12-23 12:43:00	YES	2020-01-08 19:35:00	X	NO	NO	NO		NO	NO
86	57	M	1.73	2	2020-01-09 09:44:00	NO	2020-01-08 17:53:00	X	NO	NO	NO	NO		NO
87	62	M	55.95	56	2019-11-13 17:55:00	YES	2020-01-08 14:46:00	X	YES	YES	NO	NO		NO
88	46	F	0.21	0	2020-01-09 16:48:00	NO	2020-01-08 14:31:00	X	NO	NO	NO		YES	YES
89	60	M	1.93	2	2020-01-10 12:43:00	NO	2020-01-08 13:33:00	X	NO	NO	NO	NO		NO
90	89	F	0.79	1	2020-01-08 22:18:00	NO	2020-01-08 13:24:00	X	NO	NO	NO		NO	NO
91	68	F	34.41	34	2019-12-06 06:20:00	NO	2020-01-08 12:49:00	X	NO	NO	NO		NO	NO
92	72	M	0.91	1	2020-01-08 16:45:00	YES	2020-01-08 11:12:00	X	NO	NO	NO	NO		NO
93	71	M	0.08	0	2020-01-08 12:05:00	YES	2020-01-08 10:49:00	X	NO	NO	NO	NO		NO
94	79	M	85.36	85	2019-10-15 13:08:00	YES	2020-01-08 08:44:00	X	NO	NO	NO	NO		NO
95	59	M	0.17	0	2020-01-08 11:42:00	YES	2020-01-08 06:34:00	X	NO	NO	NO	NO		NO
96	74	F	55.32	55	2019-11-14 07:47:00	YES	2020-01-08 05:18:00	X	NO	NO	NO		NO	NO
97	51	F	79.06	79	2019-10-21 11:36:00	YES	2020-01-08 02:21:00	X	NO	NO	NO		NO	NO
98	43	M	0.64	1	2020-01-09 07:39:00	NO	2020-01-08 01:37:00	X	NO	NO	NO	NO		NO
99	54	F	1	1	2020-01-07 23:17:00	NO	2020-01-07 21:46:00	X	NO	NO	NO		NO	NO
100	79	M	0.01	0	2020-01-07 23:53:00	YES	2020-01-07 21:05:00	X	NO	NO	NO	NO		NO	NO	NO	NO	NO		NO
101	74	M	0.57	1	2020-01-09 09:12:00	YES	2020-01-07 20:27:00	X	NO	NO	NO	NO		NO
102	65	F	0.02	0	2020-01-07 20:25:00	NO	2020-01-07 19:30:00	X	NO	NO	NO		NO	NO
103	78	F	0.39	0	2020-01-08 04:49:00	NO	2020-01-07 19:25:00	X	NO	NO	NO		YES	NO	NO	NO	NO		NO	NO
104	74	F	62.67	63	2019-11-06 08:51:00	NO	2020-01-07 18:52:00	X	NO	NO	NO		NO	NO
105	79	M	0.63	1	2020-01-08 02:50:00	NO	2020-01-07 18:00:00	X	NO	NO	NO	NO		NO
106	64	M	0.15	0	2020-01-07 18:59:00	YES	2020-01-07 17:53:00	X	NO	NO	NO	NO		NO
107	31	M	0.66	1	2020-01-08 02:14:00	NO	2020-01-07 17:00:00	X	NO	NO	NO	NO		NO
108	63	F	80.28	80	2019-10-22 08:53:00	NO	2020-01-07 16:07:00	X	NO	NO	NO		NO	NO	NO	NO	NO		NO	NO
109	81	F	0.66	1	2020-01-08 01:13:00	YES	2020-01-07 16:04:00	X	NO	NO	NO		YES	YES
110	51	M	3.53	4	2020-01-12 08:14:00	NO	2020-01-07 16:02:00	X	NO	NO	NO	NO		NO
111	60	F	0.42	0	2020-01-07 16:19:00	NO	2020-01-07 15:39:00	X	NO	NO	NO		YES	YES
112	83	M	0.46	0	2020-01-08 06:41:00	NO	2020-01-07 14:30:00	X	NO	NO	NO	NO		NO
113	44	M	90.39	90	2019-10-09 10:45:00	NO	2020-01-07 14:13:00	X	NO	NO	NO	YES		YES
114	60	M	0.18	0	2020-01-08 06:36:00	NO	2020-01-07 13:31:00	X	NO	NO	NO	NO		NO
115	69	F	0.34	0	2020-01-07 15:13:00	YES	2020-01-07 13:06:00	X	NO	NO	NO		YES	YES
116	65	F	86	86	2019-10-14 10:26:00	NO	2020-01-07 12:48:00	X	NO	NO	NO		YES	YES
117	77	F	1.2	1	2020-01-09 15:38:00	NO	2020-01-07 12:01:00	X	NO	NO	NO		YES	YES
118	62	F	0.08	0	2020-01-07 15:21:00	NO	2020-01-07 11:49:00	X	NO	NO	NO		NO	NO
119	46	F	0.22	0	2020-01-07 12:39:00	NO	2020-01-07 10:34:00	X	NO	NO	NO		NO	NO	NO	NO	NO		NO	NO
120	71	M	0.47	0	2020-01-07 14:43:00	YES	2020-01-07 10:23:00	X	NO	NO	NO	NO		NO
121	51	F	0.72	1	2020-01-08 08:33:00	YES	2020-01-07 09:36:00	X	NO	NO	NO		NO	NO
122	44	M	0.03	0	2020-01-06 22:33:00	NO	2020-01-06 21:45:00	X	NO	NO	NO	NO		NO
123	59	F	1.02	1	2020-01-07 02:09:00	NO	2020-01-06 20:33:00	X	NO	NO	NO		YES	YES
124	49	M	0	0	2020-01-07 17:09:00	NO	2020-01-06 20:00:00	X	NO	NO	NO	NO		NO
125	57	F	0.58	1	2020-01-07 11:00:00	NO	2020-01-06 19:02:00	X	NO	NO	NO		NO	NO
126	35	F	0.02	0	2020-01-07 10:22:00	NO	2020-01-06 18:10:00	X	NO	NO	NO		NO	NO
127	96	F	0.13	0	2020-01-06 18:07:00	NO	2020-01-06 17:24:00	X	NO	NO	NO		NO	NO
128	67	M	22.02	22	2019-12-16 20:19:00	NO	2020-01-06 16:18:00	X	NO	NO	NO	NO		NO	NO	NO	NO	NO		NO
129	77	F	34.7	35	2019-12-03 22:21:00	NO	2020-01-06 16:07:00	X	NO	NO	NO		NO	NO	NO	NO	NO		NO	NO
130	69	F	4.08	4	2020-01-11 19:05:00	NO	2020-01-06 15:31:00	X	NO	NO	NO		YES	YES	NO	NO	NO		YES	YES
131	92	F	0.19	0	2020-01-07 00:19:00	NO	2020-01-06 14:43:00	X	NO	NO	NO		NO	NO
132	58	F	0.44	0	2020-01-07 09:04:00	NO	2020-01-06 14:37:00	X	NO	NO	NO		YES	YES
133	75	F	2.3	2	2020-01-09 07:32:00	NO	2020-01-06 13:52:00	X	NO	NO	NO		NO	NO
134	54	M	0.7	1	2020-01-06 17:31:00	YES	2020-01-06 13:23:00	X	NO	NO	NO	YES		YES
135	56	F	0.46	0	2020-01-07 08:56:00	NO	2020-01-06 13:10:00	X	NO	NO	NO		YES	YES
136	51	F	1.86	2	2020-01-08 13:04:00	NO	2020-01-06 12:46:00	X	NO	NO	NO		NO	NO
137	51	M	0.87	1	2020-01-07 18:38:00	NO	2020-01-06 11:48:00	X	NO	NO	NO	NO		NO
138	66	M	49.67	50	2019-11-17 20:03:00	YES	2020-01-06 09:57:00	X	NO	NO	NO	NO		NO
139	75	F	87.89	88	2019-10-11 12:22:00	NO	2020-01-06 08:59:00	X	NO	NO	NO		NO	NO	NO	NO	NO		NO	NO
140	71	M	0.18	0	2020-01-06 16:22:00	YES	2020-01-06 08:57:00	X	NO	NO	NO	NO		NO	NO	NO	NO	NO		NO
141	35	F	58.33	58	2019-11-09 11:17:00	NO	2020-01-06 08:39:00	X	NO	NO	NO		NO	NO
142	69	M	0.53	1	2020-01-07 08:39:00	YES	2020-01-06 07:48:00	X	NO	NO	NO	YES		YES
143	56	F	0.04	0	2020-01-06 05:33:00	YES	2020-01-06 04:38:00	X	NO	NO	NO		NO	NO
144	59	M	0.61	1	2020-01-06 03:05:00	NO	2020-01-06 02:23:00	X	NO	NO	NO	NO		NO
145	29	F	1.34	1	2020-01-06 11:06:00	NO	2020-01-06 02:07:00	X	NO	NO	YES		NO	NO
146	90	M	8.11	8	2020-01-14 12:39:00	NO	2020-01-05 23:45:00	X	NO	NO	YES	YES		YES
147	42	F	0.18	0	2020-01-06 05:14:00	NO	2020-01-05 23:10:00	X	NO	NO	NO		NO	NO
148	79	F	21.32	21	2019-12-17 12:37:00	NO	2020-01-05 23:01:00	X	NO	NO	YES		YES	YES
149	79	M	0.04	0	2020-01-05 22:59:00	NO	2020-01-05 22:10:00	X	NO	NO	NO	NO		NO
150	69	F	0.89	1	2020-01-06 10:02:00	NO	2020-01-05 21:28:00	X	NO	NO	NO		NO	NO
151	82	M	4.35	4	2020-01-02 14:43:00	NO	2020-01-05 20:19:00	X	NO	NO	NO	NO		NO	NO	NO	NO	NO		NO
152	54	M	0.05	0	2020-01-05 20:55:00	NO	2020-01-05 20:04:00	X	NO	NO	NO	NO		NO						NO
153	78	M	0.01	0	2020-01-05 18:33:00	NO	2020-01-05 17:54:00	X	NO	NO	NO	NO		NO
154	90	M	0.01	0	2020-01-05 20:59:00	YES	2020-01-05 17:14:00	X	NO	NO	NO	NO		NO
155	80	M	2.23	2	2020-01-05 16:15:00	YES	2020-01-05 10:41:00	X	YES	NO	NO	NO		NO	YES	NO	NO	NO		NO
156	35	M	22.15	22	2019-12-16 15:55:00	YES	2020-01-05 10:07:00	X	YES	NO	NO	YES		YES
157	75	M	0.05	0	2020-01-05 10:31:00	NO	2020-01-05 05:49:00	X	NO	NO	NO	NO		NO
158	49	M	20.87	21	2019-12-15 18:26:00	NO	2020-01-05 05:26:00	X	NO	NO	NO	NO		NO
159	45	F	2.43	2	2020-01-05 05:44:00	NO	2020-01-05 01:22:00	X	NO	NO	NO		NO	NO
160	48	M	87.61	88	2019-10-09 11:37:00	NO	2020-01-04 22:23:00	X	NO	NO	YES	YES		YES
161	55	M	0.87	1	2020-01-06 14:03:00	NO	2020-01-04 21:33:00	X	NO	NO	NO	NO		NO
162	46	F	0.24	0	2020-01-05 00:13:00	YES	2020-01-04 18:37:00	X	NO	NO	NO		NO	NO
163	26	F	0.87	1	2020-01-05 06:22:00	NO	2020-01-04 17:15:00	X	NO	NO	NO		NO	NO
164	49	F	0.02	0	2020-01-04 16:22:00	NO	2020-01-04 16:07:00	X	NO	NO	NO		NO	NO
165	65	M	0.08	0	2020-01-04 16:16:00	NO	2020-01-04 15:40:00	X	NO	NO	NO	NO		NO
166	39	F	20.04	20	2019-12-17 09:16:00	NO	2020-01-04 14:15:00	X	NO	NO	NO		NO	NO
167	59	F	0.9	1	2020-01-05 11:47:00	NO	2020-01-04 10:48:00	X	NO	NO	NO		NO	NO
168	74	M	0.1	0	2020-01-04 20:39:00	NO	2020-01-04 10:34:00	X	NO	NO	NO	NO		NO	NO	NO	NO	NO		NO
169	56	F	88.1	88	2019-10-08 13:17:00	YES	2020-01-04 08:40:00	X	NO	NO	NO		NO	NO
170	68	F	2.78	3	2020-01-07 06:35:00	YES	2020-01-04 08:11:00	X	YES	NO	NO		YES	YES
171	25	F	35.89	36	2019-11-29 19:25:00	NO	2020-01-04 04:27:00	X	NO	NO	NO		NO	NO
172	48	F	0.2	0	2020-01-04 08:29:00	NO	2020-01-04 03:17:00	X	NO	NO	NO		NO	NO
173	30	F	8	8	2019-12-27 13:14:00	NO	2020-01-04 03:14:00	X	NO	NO	NO		NO	NO
174	31	M	0.08	0	2020-01-04 11:30:00	NO	2020-01-04 02:42:00	X	YES	NO	NO	YES		YES
175	88	M	7.84	8	2020-01-12 09:29:00	NO	2020-01-03 23:07:00	X	NO	NO	NO	NO		NO
176	65	M	0.1	0	2020-01-04 01:43:00	YES	2020-01-03 22:05:00	X	NO	NO	NO	NO		NO
177	57	M	3.11	3	2020-01-01 10:49:00	NO	2020-01-03 21:20:00	X	NO	NO	YES	NO		NO	NO	NO	YES	NO		NO
178	60	M	0.46	0	2020-01-04 11:31:00	YES	2020-01-03 20:18:00	X	NO	NO	NO	NO		NO
179	30	M	0.25	0	2020-01-04 08:41:00	YES	2020-01-03 19:50:00	X	YES	YES	NO	NO		NO
180	50	M	28.81	29	2019-12-06 03:57:00	YES	2020-01-03 19:00:00	X	NO	NO	NO	NO		NO
181	27	F	62.81	63	2019-11-02 02:13:00	NO	2020-01-03 18:38:00	X	NO	NO	NO		NO	NO
182	41	M	0.89	1	2020-01-03 17:13:00	NO	2020-01-03 17:14:00	X	NO	NO	NO	NO		NO
183	84	M	71.45	71	2019-10-24 08:49:00	NO	2020-01-03 13:34:00	X	NO	NO	NO	NO		NO
184	37	M	0.35	0	2020-01-04 07:01:00	NO	2020-01-03 12:58:00	X	NO	NO	NO	NO		NO
185	68	F	25.5	26	2019-12-09 09:26:00	NO	2020-01-03 12:07:00	X	NO	NO	NO		YES	YES
186	56	M	52.6	53	2019-11-12 10:35:00	NO	2020-01-03 11:48:00	X	NO	NO	NO	NO		NO
187	78	F	0.04	0	2020-01-03 13:14:00	NO	2020-01-03 09:31:00	X	YES	NO	NO		YES	YES
188	67	F	0.05	0	2020-01-03 07:58:00	NO	2020-01-03 07:31:00	X	NO	NO	NO		NO	NO
189	70	F	0.06	0	2020-01-03 19:43:00	NO	2020-01-03 05:23:00	X	NO	NO	NO		NO	NO
190	45	F	14.95	15	2019-12-20 16:52:00	YES	2020-01-03 02:24:00	X	YES	NO	NO		YES	YES
191	67	M	0	0	2020-01-03 05:13:00	YES	2020-01-03 01:40:00	X	NO	NO	YES	YES		YES
192	70	M	73.86	74	2019-10-21 14:19:00	YES	2020-01-03 01:17:00	X	YES	NO	NO	NO		NO	NO	NO	NO	NO		NO
193	38	M	0.37	0	2020-01-04 10:29:00	NO	2020-01-02 22:30:00	X	NO	NO	NO	NO		NO
194	81	M	0.56	1	2020-01-03 04:28:00	NO	2020-01-02 20:00:00	X	NO	NO	NO	NO		NO
195	74	M	0.76	1	2020-01-02 21:01:00	NO	2020-01-02 19:51:00	X	NO	NO	NO	NO		NO
196	43	F	0.05	0	2020-01-03 15:18:00	NO	2020-01-02 19:23:00	X	NO	NO	NO		NO	NO
197	73	M	0.84	1	2020-01-03 03:39:00	NO	2020-01-02 18:46:00	X	NO	NO	NO	NO		NO
198	67	M	63.4	63	2019-10-31 10:21:00	NO	2020-01-02 17:29:00	X	NO	NO	YES	YES		YES
199	72	F	48.29	48	2019-11-15 14:13:00	NO	2020-01-02 16:23:00	X	NO	NO	NO		NO	NO	NO	NO	NO		NO	NO
200	84	M	0	0	2020-01-02 20:02:00	YES	2020-01-02 15:54:00	X	YES	NO	NO	YES		YES	NO	NO	NO	NO		NO
201	66	M	0.82	1	2020-01-03 15:09:00	YES	2020-01-02 14:51:00	X	NO	NO	NO	NO		NO
202	67	F	0.75	1	2020-01-04 07:58:00	YES	2020-01-02 14:45:00	X	NO	NO	NO		NO	NO
203	91	F	63.98	64	2019-10-30 17:26:00	NO	2020-01-02 13:42:00	X	NO	NO	NO		NO	NO	NO	NO	NO		NO	NO
204	63	M	0.21	0	2020-01-02 16:57:00	YES	2020-01-02 13:41:00	X	NO	NO	NO	NO		NO
205	76	M	49.12	49	2019-11-14 13:40:00	NO	2020-01-02 13:08:00	X	YES	NO	NO	NO		NO
206	59	F	0.63	1	2020-01-03 10:41:00	YES	2020-01-02 12:58:00	X	NO	NO	NO		YES	YES
207	66	M	0.21	0	2020-01-02 14:34:00	YES	2020-01-02 12:40:00	X	NO	NO	NO	NO		NO
208	56	M	0.87	1	2020-01-03 14:39:00	NO	2020-01-02 12:27:00	X	NO	NO	NO	NO		NO
209	82	M	4.64	5	2020-01-07 09:13:00	YES	2020-01-02 12:26:00	X	NO	NO	NO	NO		NO
210	81	F	80.2	80	2019-10-14 13:38:00	YES	2020-01-02 12:16:00	X	NO	NO	NO		YES	YES
211	65	M	0	0	2020-01-02 12:53:00	NO	2020-01-02 11:47:00	X	NO	NO	NO	NO		NO
212	47	M	0.54	1	2020-01-03 08:39:00	YES	2020-01-02 11:25:00	X	YES	YES	NO	YES		YES
213	72	M	0.28	0	2020-01-02 11:40:00	NO	2020-01-02 10:43:00	X	NO	NO	NO	NO		NO
214	79	F	15.39	15	2019-12-18 10:28:00	NO	2020-01-02 10:23:00	X	NO	NO	NO		NO	NO
215	83	M	0.06	0	2020-01-02 13:54:00	NO	2020-01-02 08:51:00	X	NO	NO	NO	YES		YES
216	32	F	0.62	1	2020-01-03 10:44:00	NO	2020-01-02 08:44:00	X	NO	NO	NO		NO	NO
217	69	M	0.86	1	2020-01-03 06:59:00	YES	2020-01-02 07:00:00	X	NO	NO	NO	NO		NO
218	22	F	1.27	1	2020-01-02 11:49:00	NO	2020-01-02 02:10:00	X	NO	NO	NO		YES	YES
219	69	F	0.07	0	2020-01-02 10:30:00	YES	2020-01-02 00:53:00	X	NO	NO	NO		NO	NO
220	58	M	3.79	4	2020-01-05 20:42:00	NO	2020-01-01 22:49:00	X	NO	NO	NO	NO		NO
221	55	M	14.33	14	2019-12-18 19:00:00	YES	2020-01-01 21:33:00	X	NO	NO	NO	NO		NO
222	79	M	0.1	0	2020-01-02 05:16:00	NO	2020-01-01 21:16:00	X	NO	NO	NO	NO		NO
223	57	F	0.06	0	2020-01-02 15:12:00	YES	2020-01-01 20:14:00	X	NO	NO	NO		NO	NO
224	30	F	0.7	1	2020-01-02 05:37:00	NO	2020-01-01 19:43:00	X	NO	NO	NO		NO	NO
225	77	M	2.42	2	2020-01-04 13:05:00	NO	2020-01-01 18:58:00	X	NO	NO	NO	NO		NO
226	65	M	8.17	8	2019-12-25 09:00:00	NO	2020-01-01 17:34:00	X	NO	NO	NO	NO		NO
227	84	M	7.97	8	2019-12-24 20:59:00	YES	2020-01-01 17:33:00	X	NO	NO	NO	NO		NO
228	64	M	0.39	0	2020-01-02 09:34:00	YES	2020-01-01 17:03:00	X	NO	NO	NO	NO		NO
229	59	F	36.6	37	2019-11-26 07:01:00	YES	2020-01-01 16:40:00	X	NO	NO	NO		NO	NO	NO	NO	NO		NO	NO
230	60	F	1.62	2	2020-01-02 03:43:00	NO	2020-01-01 15:41:00	X	NO	NO	NO		NO	NO
231	60	F	0.04	0	2020-01-01 17:05:00	NO	2020-01-01 12:50:00	X	NO	NO	YES		YES	YES
232	72	F	15.39	15	2019-12-17 08:03:00	NO	2020-01-01 12:48:00	X	NO	NO	NO		NO	NO
233	87	F	0.17	0	2020-01-02 14:11:00	NO	2020-01-01 12:36:00	X	NO	NO	NO		YES	YES
234	29	F	0.28	0	2020-01-01 07:15:00	YES	2020-01-01 02:33:00	X	YES	YES	NO		YES	YES
235	58	M	11.72	12	2019-12-20 12:32:00	NO	2020-01-01 01:28:00	X	NO	NO	NO	NO		NO
236	86	M	68.56	69	2019-10-25 05:47:00	YES	2020-01-01 00:50:00	X	NO	NO	NO	NO		NO
237	29	M	0.77	1	2020-01-02 16:55:00	YES	2019-12-31 22:39:00	X	YES	YES	NO	NO		NO	YES	YES	NO	NO		NO
238	35	F	11.98	12	2020-01-12 22:36:00	NO	2019-12-31 22:02:00	X	NO	NO	NO		NO	NO
239	69	F	7.06	7	2020-01-08 08:42:00	NO	2019-12-31 18:38:00	X	NO	NO	NO		NO	NO
240	62	F	0.08	0	2020-01-02 17:24:00	YES	2019-12-31 18:18:00	X	NO	NO	NO		NO	NO
241	95	M	5.65	6	2020-01-06 12:56:00	YES	2019-12-31 17:55:00	X	YES	NO	NO	YES		YES
242	73	F	0.63	1	2020-01-01 15:51:00	YES	2019-12-31 17:44:00	X	NO	NO	NO		NO	NO
243	62	M	0.05	0	2019-12-31 21:31:00	NO	2019-12-31 16:29:00	X	NO	NO	NO	NO		NO
244	82	F	78.48	78	2019-10-14 10:14:00	YES	2019-12-31 15:51:00	X	NO	NO	NO		NO	NO
245	59	F	6.24	6	2020-01-07 02:09:00	NO	2019-12-31 15:03:00	X	NO	NO	NO		NO	NO
246	74	F	57.54	58	2019-11-04 10:20:00	YES	2019-12-31 14:29:00	X	NO	NO	NO		YES	YES
247	80	M	0.6	1	2020-01-01 08:31:00	NO	2019-12-31 14:14:00	X	NO	NO	NO	NO		NO
248	30	M	4.3	4	2020-01-05 06:50:00	NO	2019-12-31 13:00:00	X	NO	NO	NO	NO		NO
249	64	F	87.97	88	2019-10-05 00:26:00	NO	2019-12-31 12:23:00	X	NO	NO	YES		NO	NO
250	62	F	70.96	71	2019-10-21 19:32:00	NO	2019-12-31 09:33:00	X	NO	NO	NO		YES	YES
251	68	M	0.15	0	2019-12-31 13:50:00	NO	2019-12-31 05:16:00	X	NO	NO	NO	NO		NO
252	41	M	0.6	1	2019-12-31 04:23:00	NO	2019-12-31 04:24:00	X	NO	NO	NO	NO		NO
253	55	M	0.85	1	2019-12-30 23:49:00	NO	2019-12-30 23:49:00	X	YES	NO	NO	YES		YES	NO	NO	NO	NO		NO
254	52	F	0.01	0	2019-12-30 19:22:00	YES	2019-12-30 18:39:00	X	YES	NO	NO		YES	YES
255	69	M	28.18	28	2019-12-03 16:43:00	NO	2019-12-30 18:15:00	X	YES	NO	YES	NO		NO
256	64	F	21.08	21	2019-12-09 21:37:00	NO	2019-12-30 17:47:00	X	NO	NO	NO		NO	NO
257	56	F	55.21	55	2019-11-05 15:07:00	NO	2019-12-30 17:13:00	X	NO	NO	NO		NO	NO
258	27	F	47.24	47	2019-11-14 08:18:00	NO	2019-12-30 16:48:00	X	NO	NO	NO		NO	NO
259	66	F	0.88	1	2019-12-30 23:39:00	NO	2019-12-30 16:31:00	X	NO	NO	NO		NO	NO
260	46	M	0.29	0	2019-12-30 12:51:00	YES	2019-12-30 16:00:00	X	NO	NO	NO	NO		NO
261	76	M	1.04	1	2019-12-30 21:10:00	NO	2019-12-30 14:51:00	X	NO	NO	NO	NO		NO
262	33	M	2.11	2	2020-01-02 19:29:00	NO	2019-12-30 14:27:00	X	NO	NO	NO	NO		NO
263	60	M	0.87	1	2019-12-30 15:15:00	NO	2019-12-30 14:08:00	X	NO	NO	NO	NO		NO
264	60	M	1.36	1	2019-12-30 17:09:00	NO	2019-12-30 13:38:00	X	NO	NO	NO	NO		NO
265	49	M	1.39	1	2019-12-31 07:51:00	YES	2019-12-30 13:22:00	X	NO	NO	NO	NO		NO
266	67	M	2.65	3	2020-01-02 08:21:00	NO	2019-12-30 13:05:00	X	NO	NO	NO	NO		NO
267	62	M	0.87	1	2019-12-30 17:10:00	YES	2019-12-30 12:18:00	X	NO	NO	NO	NO		NO
268	37	M	26.22	26	2019-12-05 09:20:00	NO	2019-12-30 11:49:00	X	NO	NO	NO	NO		NO	NO	NO	NO	NO		NO
269	63	M	53.32	53	2019-11-07 09:31:00	NO	2019-12-30 11:00:00	X	NO	NO	NO	NO		NO
270	77	M	0.22	0	2019-12-30 15:36:00	NO	2019-12-30 10:32:00	X	NO	NO	NO	NO		NO
271	76	F	5.73	6	2020-01-05 10:34:00	NO	2019-12-30 09:55:00	X	NO	NO	NO		NO	NO
272	50	M	3.03	3	2020-01-02 17:20:00	YES	2019-12-30 06:48:00	X	NO	NO	YES	NO		NO
273	53	F	10.08	10	2020-01-09 13:16:00	NO	2019-12-30 06:40:00	X	NO	NO	NO		NO	NO	NO	NO	NO		NO	NO
274	59	M	6.7	7	2019-12-23 21:54:00	NO	2019-12-30 03:21:00	X	NO	NO	NO	NO		NO
275	58	M	0.94	1	2019-12-31 08:44:00	YES	2019-12-30 02:00:00	X	NO	NO	NO	YES		YES
276	31	F	0.13	0	2019-12-30 06:18:00	NO	2019-12-30 00:15:00	X	NO	NO	NO		NO	NO
277	64	F	1.96	2	2019-12-30 04:05:00	YES	2019-12-29 23:20:00	X	NO	NO	NO		NO	NO
278	64	F	7.21	7	2020-01-06 10:30:00	YES	2019-12-29 23:01:00	X	NO	NO	NO		NO	NO
279	71	M	30.88	31	2019-11-29 09:57:00	NO	2019-12-29 20:47:00	X	NO	NO	NO	NO		NO
280	87	M	1.53	2	2019-12-29 23:38:00	YES	2019-12-29 19:52:00	X	NO	NO	NO	NO		NO
281	62	F	12.34	12	2019-12-18 12:19:00	NO	2019-12-29 18:27:00	X	NO	NO	YES		YES	YES
282	54	F	11.55	12	2019-12-19 07:29:00	NO	2019-12-29 17:48:00	X	NO	NO	NO		NO	NO
283	68	F	14.16	14	2019-12-17 13:49:00	NO	2019-12-29 17:45:00	X	NO	NO	NO		NO	NO
284	76	F	28.45	28	2019-12-02 07:49:00	NO	2019-12-29 15:07:00	X	NO	NO	NO		NO	NO
285	62	M	0.23	0	2019-12-29 12:48:00	YES	2019-12-29 12:16:00	X	YES	NO	NO	YES		YES
286	37	F	33.18	33	2019-11-26 11:33:00	NO	2019-12-29 11:17:00	X	NO	NO	NO		NO	NO
287	59	M	0.16	0	2019-12-30 23:46:00	NO	2019-12-29 11:03:00	X	NO	NO	NO	NO		NO
288	54	M	0.38	0	2019-12-29 11:31:00	NO	2019-12-29 10:14:00	X	NO	NO	NO	NO		NO
289	73	M	0.12	0	2019-12-29 06:16:00	NO	2019-12-29 05:17:00	X	NO	NO	NO	NO		NO	NO	NO	NO	NO		NO
290	72	M	0.74	1	2019-12-29 23:14:00	NO	2019-12-29 03:03:00	X	NO	NO	NO	NO		NO
291	71	M	4.78	5	2019-12-24 07:08:00	YES	2019-12-29 00:17:00	X	NO	NO	NO	NO		NO
292	35	F	14.69	15	2020-01-12 22:36:00	NO	2019-12-28 23:13:00	X	NO	NO	NO		NO	NO	NO	NO	NO		NO	NO
293	68	M	0.03	0	2019-12-29 18:53:00	NO	2019-12-28 22:36:00	X	NO	NO	NO	NO		NO
294	55	M	0.04	0	2019-12-29 00:12:00	NO	2019-12-28 21:54:00	X	NO	NO	NO	NO		NO
295	42	M	0.1	0	2019-12-29 04:47:00	NO	2019-12-28 21:06:00	X	YES	YES	NO	NO		NO
296	35	F	49.57	50	2019-11-09 11:17:00	NO	2019-12-28 20:32:00	X	NO	NO	NO		NO	NO
297	68	F	1.4	1	2019-12-30 12:14:00	NO	2019-12-28 18:53:00	X	NO	NO	NO		NO	NO
298	53	M	1.53	2	2019-12-30 13:13:00	YES	2019-12-28 18:12:00	X	NO	YES	NO	NO		NO
299	63	F	0.04	0	2019-12-28 18:51:00	NO	2019-12-28 17:52:00	X	NO	NO	NO		NO	NO
300	20	F	51.31	51	2019-11-08 09:39:00	YES	2019-12-28 16:06:00	X	NO	NO	NO		NO	NO
301	87	F	0.14	0	2019-12-28 22:07:00	YES	2019-12-28 15:47:00	X	NO	NO	NO		NO	NO
302	63	M	64.61	65	2019-10-25 08:00:00	NO	2019-12-28 15:26:00	X	NO	NO	NO	NO		NO
303	97	F	1.42	1	2019-12-30 12:43:00	YES	2019-12-28 14:26:00	X	NO	NO	NO		NO	NO
304	63	M	13.2	13	2019-12-15 19:33:00	NO	2019-12-28 12:39:00	X	NO	NO	NO	NO		NO
305	67	F	30.43	30	2019-11-28 13:22:00	NO	2019-12-28 11:11:00	X	NO	NO	NO		NO	NO
306	54	F	86.5	87	2019-10-03 11:16:00	NO	2019-12-28 11:01:00	X	YES	NO	NO		YES	YES
307	67	F	1.17	1	2019-12-30 15:22:00	NO	2019-12-28 09:43:00	X	NO	NO	NO		NO	NO
308	75	F	0.01	0	2019-12-28 17:14:00	YES	2019-12-28 09:39:00	X	YES	YES	NO		NO	NO
309	88	M	8.81	9	2020-01-06 05:35:00	NO	2019-12-28 09:12:00	X	NO	NO	NO	NO		NO
310	68	F	1.2	1	2019-12-29 22:52:00	YES	2019-12-28 07:16:00	X	NO	NO	NO		YES	YES	NO	NO	NO		NO	NO
311	35	F	64.11	64	2019-10-25 03:42:00	NO	2019-12-28 03:32:00	X	NO	NO	NO		NO	NO	NO	NO	YES		NO	NO
312	44	F	2.86	3	2019-12-31 13:37:00	NO	2019-12-28 03:10:00	X	NO	NO	NO		NO	NO
313	77	F	0.02	0	2019-12-28 19:22:00	NO	2019-12-28 02:44:00	X	NO	NO	NO		NO	NO
314	68	M	0.28	0	2019-12-28 09:20:00	YES	2019-12-28 02:13:00	X	NO	NO	NO	NO		NO
315	66	M	1.44	1	2019-12-29 14:29:00	NO	2019-12-28 01:07:00	X	NO	NO	NO	NO		NO
316	50	M	0.09	0	2019-12-28 08:52:00	YES	2019-12-27 23:26:00	X	NO	NO	NO	NO		NO
317	82	F	0	0	2019-12-28 01:50:00	YES	2019-12-27 23:16:00	X	NO	NO	NO		NO	NO
318	64	M	10.04	10	2020-01-08 20:35:00	YES	2019-12-27 22:49:00	X	NO	NO	NO	NO		NO
319	36	F	0.23	0	2019-12-29 11:55:00	NO	2019-12-27 20:36:00	X	NO	NO	NO		NO	NO
320	72	F	39.26	39	2019-11-19 08:06:00	NO	2019-12-27 18:53:00	X	NO	NO	NO		NO	NO
321	77	F	50.4	50	2019-11-07 13:13:00	NO	2019-12-27 18:44:00	X	NO	NO	NO		NO	NO
322	85	F	0.6	1	2019-12-27 18:37:00	NO	2019-12-27 18:37:00	X	YES	NO	NO		NO	NO
323	49	M	0.86	1	2019-12-28 18:28:00	NO	2019-12-27 18:26:00	X	YES	NO	NO	NO		NO
324	42	F	0.56	1	2019-12-28 01:12:00	NO	2019-12-27 18:24:00	X	NO	NO	NO		NO	NO
325	61	F	10.4	10	2020-01-07 08:45:00	NO	2019-12-27 17:44:00	X	YES	NO	YES		YES	YES
326	62	M	0.61	1	2019-12-28 11:16:00	YES	2019-12-27 17:28:00	X	NO	NO	NO	NO		NO
327	70	M	0.03	0	2019-12-27 20:21:00	NO	2019-12-27 17:06:00	X	NO	NO	NO	NO		NO	NO	NO	NO	NO		NO
328	84	M	0.04	0	2019-12-28 23:37:00	NO	2019-12-27 16:08:00	X	NO	NO	NO	NO		NO
329	39	F	47.32	47	2019-11-10 10:30:00	NO	2019-12-27 15:54:00	X	NO	NO	NO		NO	NO
330	56	M	56.48	56	2019-11-01 12:15:00	NO	2019-12-27 15:16:00	X	NO	NO	NO	NO		NO
331	41	M	24.77	25	2019-12-04 11:29:00	NO	2019-12-27 15:10:00	X	NO	NO	NO	NO		NO
332	67	M	0.67	1	2019-12-27 17:33:00	NO	2019-12-27 14:27:00	X	YES	NO	NO	NO		NO
333	34	M	0.78	1	2019-12-27 20:48:00	NO	2019-12-27 14:25:00	X	NO	NO	NO	NO		NO
334	99	F	0.94	1	2019-12-27 16:58:00	YES	2019-12-27 13:35:00	X	YES	NO	YES		NO	NO
335	81	F	0.24	0	2019-12-27 14:19:00	YES	2019-12-27 13:25:00	X	NO	NO	NO		NO	NO	NO	NO	YES		NO	NO
336	48	M	14.42	14	2019-12-13 08:24:00	YES	2019-12-27 12:05:00	X	YES	NO	NO	NO		NO
337	47	M	0.04	0	2019-12-27 17:53:00	NO	2019-12-27 10:00:00	X	NO	NO	NO	NO		NO
338	97	M	1.75	2	2019-12-29 15:50:00	NO	2019-12-27 09:46:00	X	NO	NO	NO	NO		NO
339	45	M	0.11	0	2019-12-27 14:37:00	NO	2019-12-27 09:25:00	X	NO	NO	NO	NO		NO
340	32	M	34.17	34	2019-11-24 13:23:00	NO	2019-12-27 09:22:00	X	NO	NO	NO	NO		NO
341	54	M	1.71	2	2019-12-29 11:20:00	NO	2019-12-27 09:19:00	X	NO	NO	NO	NO		NO
342	50	M	0.01	0	2019-12-27 09:53:00	NO	2019-12-27 07:41:00	X	NO	NO	YES	YES		YES
343	67	M	81.6	82	2019-10-08 08:54:00	YES	2019-12-27 07:15:00	X	NO	NO	NO	NO		NO
344	59	M	1.49	1	2019-12-29 07:43:00	NO	2019-12-27 06:52:00	X	YES	NO	NO	YES		YES	YES	NO	NO	YES		YES
345	38	F	0.23	0	2019-12-27 13:31:00	NO	2019-12-27 03:34:00	X	NO	NO	NO		NO	NO
346	41	F	76.99	77	2019-10-11 18:59:00	NO	2019-12-27 02:42:00	X	NO	NO	NO		NO	NO
347	60	M	0.02	0	2019-12-27 13:41:00	YES	2019-12-27 02:32:00	X	NO	NO	NO	NO		NO
348	72	M	23.81	24	2019-12-03 11:49:00	YES	2019-12-27 02:28:00	X	NO	NO	NO	NO		NO
349	73	F	11.36	11	2019-12-17 08:03:00	NO	2019-12-27 01:48:00	X	NO	NO	NO		NO	NO
350	29	F	10.22	10	2020-01-06 11:06:00	NO	2019-12-26 23:44:00	X	NO	NO	NO		NO	NO
351	25	F	16.91	17	2019-12-10 18:29:00	NO	2019-12-26 22:28:00	X	NO	NO	NO		NO	NO
352	84	F	0.15	0	2019-12-26 23:14:00	YES	2019-12-26 22:11:00	X	NO	NO	NO		YES	YES
353	22	M	0.02	0	2019-12-27 01:14:00	NO	2019-12-26 21:49:00	X	NO	NO	NO	NO		NO
354	74	F	0.08	0	2019-12-26 22:59:00	NO	2019-12-26 21:22:00	X	NO	NO	NO		NO	NO
355	85	F	18.86	19	2019-12-08 21:38:00	YES	2019-12-26 20:13:00	X	NO	NO	NO		NO	NO
356	54	M	2.66	3	2019-12-31 07:00:00	NO	2019-12-26 19:55:00	X	NO	NO	NO	NO		NO
357	68	M	12.37	12	2020-01-08 07:29:00	NO	2019-12-26 19:31:00	X	NO	NO	NO	NO		NO
358	66	M	7.4	7	2020-01-04 07:46:00	YES	2019-12-26 18:21:00	X	NO	NO	NO	NO		NO
359	84	M	2.5	3	2019-12-29 09:26:00	YES	2019-12-26 17:53:00	X	NO	NO	NO	NO		NO
360	29	F	47.16	47	2019-11-09 23:16:00	NO	2019-12-26 17:48:00	X	NO	NO	NO		NO	NO
361	54	F	84.54	85	2019-10-03 11:16:00	NO	2019-12-26 17:00:00	X	YES	NO	NO		NO	NO
362	61	F	0.67	1	2019-12-27 11:46:00	NO	2019-12-26 14:39:00	X	NO	NO	NO		NO	NO
363	55	M	0.62	1	2019-12-27 11:59:00	YES	2019-12-26 14:38:00	X	NO	NO	NO	YES		YES
364	54	M	69.25	69	2019-10-18 14:15:00	NO	2019-12-26 14:00:00	X	YES	NO	NO	NO		NO
365	68	M	0.06	0	2019-12-26 15:26:00	YES	2019-12-26 13:15:00	X	NO	NO	NO	NO		NO
366	74	F	0.55	1	2019-12-27 00:35:00	YES	2019-12-26 12:14:00	X	NO	NO	NO		NO	NO
367	39	F	9.45	9	2019-12-17 09:16:00	NO	2019-12-26 11:20:00	X	NO	NO	NO		NO	NO
368	77	M	0.87	1	2019-12-27 09:40:00	NO	2019-12-26 10:50:00	X	NO	NO	NO	NO		NO
369	50	M	0.09	0	2019-12-26 14:10:00	YES	2019-12-26 08:50:00	X	NO	NO	NO	NO		NO
370	35	M	9.84	10	2019-12-16 15:55:00	YES	2019-12-26 07:20:00	X	YES	NO	NO	YES		YES
371	30	M	1.56	2	2019-12-28 09:46:00	NO	2019-12-26 03:48:00	X	NO	NO	NO	NO		NO
372	30	F	0.77	1	2019-12-27 13:14:00	NO	2019-12-26 01:22:00	X	NO	NO	YES		YES	YES
373	35	F	0.24	0	2019-12-26 08:18:00	NO	2019-12-25 22:54:00	X	NO	NO	NO		NO	NO
374	51	F	0.53	1	2019-12-26 12:11:00	NO	2019-12-25 22:41:00	X	NO	NO	NO		NO	NO
375	24	M	0.72	1	2019-12-26 18:56:00	NO	2019-12-25 22:40:00	X	YES	NO	NO	NO		NO
376	42	M	0.29	0	2019-12-26 07:41:00	NO	2019-12-25 21:32:00	X	NO	NO	YES	NO		NO
377	60	M	0.36	0	2019-12-26 10:37:00	YES	2019-12-25 21:09:00	X	NO	NO	NO	NO		NO
378	47	F	8.52	9	2020-01-03 11:14:00	YES	2019-12-25 20:18:00	X	NO	NO	NO		NO	NO
379	61	F	0.02	0	2019-12-25 20:37:00	NO	2019-12-25 19:45:00	X	YES	NO	NO		NO	NO
380	55	M	0.55	1	2019-12-26 11:34:00	YES	2019-12-25 17:39:00	X	NO	NO	NO	NO		NO
381	38	M	0.05	0	2019-12-25 19:09:00	NO	2019-12-25 17:05:00	X	YES	YES	NO	NO		NO
382	72	M	0.03	0	2019-12-25 22:05:00	NO	2019-12-25 15:46:00	X	NO	NO	NO	NO		NO	NO	NO	NO	NO		NO
383	60	F	74.55	75	2019-10-12 11:17:00	NO	2019-12-25 15:29:00	X	NO	NO	NO		NO	NO
384	60	F	0.02	0	2019-12-25 15:50:00	NO	2019-12-25 15:23:00	X	NO	NO	NO		NO	NO
385	73	F	0	0	2019-12-25 17:49:00	YES	2019-12-25 13:54:00	X	NO	NO	NO		NO	NO
386	76	M	12.28	12	2019-12-13 13:09:00	YES	2019-12-25 13:48:00	X	YES	NO	NO	NO		NO
387	67	M	58.48	58	2019-10-28 06:11:00	YES	2019-12-25 13:24:00	X	NO	NO	NO	NO		NO	NO	NO	NO	NO		NO
388	88	F	0.23	0	2019-12-25 08:39:00	YES	2019-12-25 05:37:00	X	NO	NO	NO		NO	NO
389	88	M	27.76	28	2019-11-27 14:10:00	YES	2019-12-25 05:17:00	X	NO	NO	YES	YES		YES
390	25	M	0.25	0	2019-12-25 11:55:00	NO	2019-12-25 01:40:00	X	NO	NO	NO	NO		NO
391	55	M	0.04	0	2019-12-25 06:45:00	NO	2019-12-25 01:05:00	X	NO	NO	NO	NO		NO
392	69	F	13.08	13	2019-12-12 04:06:00	NO	2019-12-25 00:29:00	X	NO	NO	NO		NO	NO
393	53	M	0.33	0	2019-12-25 03:24:00	NO	2019-12-25 00:05:00	X	NO	NO	NO	NO		NO
394	95	F	1.22	1	2019-12-26 11:02:00	NO	2019-12-24 23:14:00	X	NO	NO	NO		NO	NO	NO	NO	NO		NO	NO
395	60	M	0.12	0	2019-12-24 21:49:00	YES	2019-12-24 21:14:00	X	NO	NO	NO	NO		NO
396	44	F	0.6	1	2019-12-25 19:39:00	YES	2019-12-24 21:12:00	X	NO	NO	NO		NO	NO
397	64	M	0.28	0	2019-12-25 09:48:00	YES	2019-12-24 20:22:00	X	NO	NO	NO	NO		NO
398	33	M	71.07	71	2019-10-15 13:17:00	NO	2019-12-24 19:58:00	X	NO	NO	NO	NO		NO
399	55	F	30.65	31	2019-11-24 10:11:00	NO	2019-12-24 19:58:00	X	NO	NO	NO		NO	NO
400	81	F	2.31	2	2019-12-27 07:11:00	YES	2019-12-24 19:53:00	X	NO	NO	NO		NO	NO
401	84	M	0.23	0	2019-12-25 06:19:00	NO	2019-12-24 18:26:00	X	YES	NO	NO	NO		NO	YES	NO	NO	NO		NO
402	87	F	0.07	0	2019-12-24 20:49:00	NO	2019-12-24 18:13:00	X	NO	NO	NO		NO	NO
403	55	M	1.32	1	2019-12-27 08:12:00	YES	2019-12-24 18:09:00	X	NO	NO	NO	NO		NO
404	65	F	0.4	0	2019-12-25 07:53:00	NO	2019-12-24 16:24:00	X	NO	NO	NO		NO	NO
405	70	F	1.94	2	2019-12-26 17:11:00	NO	2019-12-24 15:56:00	X	NO	NO	NO		NO	NO	NO	NO	NO		NO	NO
406	77	M	0	0	2019-12-24 16:02:00	YES	2019-12-24 15:22:00	X	NO	NO	NO	NO		NO
407	81	F	0.69	1	2019-12-25 10:36:00	NO	2019-12-24 12:53:00	X	NO	NO	NO		NO	NO
408	78	F	0.01	0	2019-12-24 17:51:00	YES	2019-12-24 11:31:00	X	NO	NO	NO		NO	NO
409	50	M	20.95	21	2019-12-03 08:53:00	YES	2019-12-24 04:53:00	X	YES	NO	NO	NO		NO
410	73	F	0.35	0	2019-12-24 04:29:00	NO	2019-12-24 04:29:00	X	NO	NO	NO		NO	NO	NO	NO	NO		NO	NO
411	48	F	85.72	86	2019-09-29 10:46:00	YES	2019-12-23 23:55:00	X	NO	NO	NO		NO	NO
412	56	M	83.47	83	2019-10-01 18:13:00	YES	2019-12-23 23:40:00	X	NO	NO	NO	NO		NO
413	65	M	0.7	1	2019-12-25 09:00:00	NO	2019-12-23 23:01:00	X	NO	NO	NO	NO		NO
414	76	F	0.06	0	2019-12-24 03:22:00	YES	2019-12-23 22:02:00	X	NO	NO	NO		NO	NO
415	53	F	81.5	82	2019-10-03 13:31:00	NO	2019-12-23 20:38:00	X	NO	NO	NO		NO	NO	NO	NO	NO		NO	NO
416	79	M	0.21	0	2019-12-24 08:54:00	NO	2019-12-23 19:53:00	X	NO	NO	NO	NO		NO
417	65	F	0.09	0	2019-12-24 00:27:00	NO	2019-12-23 19:09:00	X	NO	NO	YES		NO	NO
418	95	M	13.54	14	2020-01-06 12:56:00	YES	2019-12-23 18:55:00	X	YES	NO	NO	NO		NO	YES	NO	NO	NO		NO
419	71	M	0.53	1	2019-12-24 07:08:00	YES	2019-12-23 18:05:00	X	NO	NO	NO	NO		NO
420	50	M	0.13	0	2019-12-23 16:38:00	NO	2019-12-23 16:24:00	X	NO	NO	NO	NO		NO
421	47	M	0.45	0	2019-12-24 07:12:00	NO	2019-12-23 15:10:00	X	NO	NO	NO	NO		NO
422	82	M	0.27	0	2019-12-23 15:44:00	NO	2019-12-23 15:05:00	X	NO	NO	NO	NO		NO
423	83	M	3.65	4	2019-12-27 11:21:00	NO	2019-12-23 14:00:00	X	NO	NO	YES	NO		NO
424	69	F	0.08	0	2019-12-23 13:35:00	NO	2019-12-23 12:43:00	X	NO	NO	NO		NO	NO
425	42	M	14.35	14	2019-12-09 10:31:00	NO	2019-12-23 12:29:00	X	NO	NO	NO	NO		NO
426	70	M	0.02	0	2019-12-23 17:27:00	YES	2019-12-23 12:25:00	X	NO	NO	NO	NO		NO
427	55	M	0.19	0	2019-12-23 15:13:00	YES	2019-12-23 11:01:00	X	NO	NO	NO	NO		NO
428	47	M	0.3	0	2019-12-23 12:50:00	NO	2019-12-23 10:28:00	X	NO	NO	NO	NO		NO	NO	NO	NO	NO		NO
429	28	F	16.01	16	2020-01-08 14:09:00	NO	2019-12-23 10:22:00	X	NO	NO	YES		NO	NO
430	43	M	0.41	0	2019-12-23 09:53:00	NO	2019-12-23 08:25:00	X	NO	NO	NO	NO		NO
431	49	M	25.56	26	2019-11-27 21:31:00	YES	2019-12-23 04:31:00	X	NO	NO	NO	NO		NO
432	30	M	0.29	0	2019-12-23 16:23:00	NO	2019-12-23 03:51:00	X	YES	YES	NO	NO		NO
433	67	M	0.23	0	2019-12-23 10:57:00	NO	2019-12-23 01:44:00	X	NO	NO	NO	NO		NO
434	72	M	33.79	34	2019-11-19 08:38:00	YES	2019-12-22 22:48:00	X	NO	NO	NO	NO		NO
435	59	M	0.31	0	2019-12-23 08:41:00	NO	2019-12-22 22:19:00	X	NO	NO	NO	NO		NO	NO	NO	NO	NO		NO
436	70	F	0.05	0	2019-12-23 02:10:00	YES	2019-12-22 20:47:00	X	NO	NO	NO		NO	NO
437	80	F	41.61	42	2019-11-11 10:02:00	NO	2019-12-22 20:01:00	X	NO	NO	NO		NO	NO
438	34	F	5.36	5	2019-12-17 15:41:00	NO	2019-12-22 19:56:00	X	NO	NO	NO		NO	NO
439	68	M	31.55	32	2019-11-21 09:47:00	NO	2019-12-22 19:49:00	X	NO	NO	NO	NO		NO
440	70	F	6.92	7	2019-12-16 02:10:00	YES	2019-12-22 18:22:00	X	NO	NO	NO		NO	NO
441	57	M	82.54	83	2019-10-01 10:37:00	YES	2019-12-22 16:54:00	X	NO	NO	NO	NO		NO
442	82	F	2.32	2	2019-12-20 14:10:00	NO	2019-12-22 15:45:00	X	NO	NO	NO		NO	NO
443	22	F	4.76	5	2019-12-27 13:39:00	NO	2019-12-22 15:40:00	X	NO	NO	NO		NO	NO
444	46	F	0.1	0	2019-12-22 18:28:00	NO	2019-12-22 13:57:00	X	NO	NO	NO		NO	NO
445	32	F	11.14	11	2019-12-11 13:49:00	NO	2019-12-22 13:48:00	X	NO	NO	NO		NO	NO
446	49	M	0.07	0	2019-12-22 13:44:00	YES	2019-12-22 13:35:00	X	NO	NO	NO	NO		NO
447	63	F	0.03	0	2019-12-22 13:35:00	NO	2019-12-22 12:12:00	X	NO	NO	NO		NO	NO
448	86	M	45.29	45	2019-11-07 10:35:00	NO	2019-12-22 12:12:00	X	NO	NO	NO	NO		NO
449	81	F	2.87	3	2019-12-25 10:36:00	NO	2019-12-22 09:14:00	X	NO	NO	NO		NO	NO
450	67	M	1.23	1	2019-12-23 21:15:00	NO	2019-12-22 08:03:00	X	NO	NO	NO	NO		NO
451	50	F	0.06	0	2019-12-22 15:27:00	YES	2019-12-22 07:49:00	X	NO	NO	NO		NO	NO
452	88	F	75.62	76	2019-10-07 19:49:00	NO	2019-12-22 06:14:00	X	NO	NO	NO		NO	NO
453	54	F	5.1	5	2019-12-27 15:41:00	NO	2019-12-22 05:35:00	X	NO	NO	NO		NO	NO
454	49	M	6.64	7	2019-12-15 18:26:00	NO	2019-12-22 05:07:00	X	NO	NO	NO	NO		NO
455	87	F	0.07	0	2019-12-22 11:11:00	YES	2019-12-22 04:33:00	X	NO	NO	NO		NO	NO
456	70	M	1.89	2	2019-12-24 12:58:00	NO	2019-12-22 04:21:00	X	NO	NO	NO	NO		NO
457	71	M	53.02	53	2019-10-30 11:54:00	YES	2019-12-21 23:49:00	X	NO	NO	YES	NO		NO
458	20	F	0.11	0	2019-12-22 12:38:00	NO	2019-12-21 22:33:00	X	NO	NO	NO		NO	NO
459	82	M	0.42	0	2019-12-22 03:46:00	YES	2019-12-21 22:20:00	X	NO	NO	NO	NO		NO
460	73	F	82.02	82	2019-10-01 11:31:00	YES	2019-12-21 20:24:00	X	NO	NO	NO		NO	NO
461	65	M	58.06	58	2019-10-25 11:39:00	NO	2019-12-21 19:23:00	X	YES	NO	NO	NO		NO	YES	NO	NO	NO		NO
462	86	F	0	0	2019-12-21 21:03:00	YES	2019-12-21 19:22:00	X	NO	NO	NO		NO	NO
463	76	F	78.41	78	2019-10-04 13:33:00	YES	2019-12-21 18:24:00	X	NO	NO	NO		NO	NO
464	72	M	0.76	1	2019-12-23 08:14:00	YES	2019-12-21 16:59:00	X	NO	NO	NO	NO		NO
465	53	F	0.05	0	2019-12-21 17:02:00	YES	2019-12-21 16:17:00	X	NO	NO	NO		NO	NO
466	77	M	2.55	3	2019-12-24 07:42:00	YES	2019-12-21 15:58:00	X	YES	YES	YES	YES		YES
467	43	M	1.65	2	2019-12-23 09:53:00	NO	2019-12-21 12:56:00	X	NO	NO	NO	NO		NO
468	91	F	51.96	52	2019-10-30 17:26:00	NO	2019-12-21 10:50:00	X	NO	NO	NO		NO	NO
469	58	M	1.28	1	2019-12-20 08:42:00	YES	2019-12-21 09:57:00	X	NO	NO	NO	NO		NO
470	75	F	0.16	0	2019-12-21 11:47:00	NO	2019-12-21 09:55:00	X	NO	NO	NO		NO	NO
471	49	M	10.05	10	2019-12-11 10:35:00	YES	2019-12-21 08:21:00	X	NO	NO	NO	NO		NO
472	74	F	0.79	1	2019-12-22 08:22:00	YES	2019-12-21 05:25:00	X	NO	NO	NO		NO	NO
473	44	M	0.07	0	2019-12-21 01:21:00	NO	2019-12-20 23:35:00	X	NO	NO	NO	NO		NO
474	56	F	0.37	0	2019-12-21 04:48:00	NO	2019-12-20 23:32:00	X	NO	NO	NO		NO	NO
475	84	M	0.04	0	2019-12-20 23:32:00	NO	2019-12-20 23:03:00	X	NO	NO	NO	NO		NO
476	44	F	0.42	0	2019-12-21 05:55:00	NO	2019-12-20 22:53:00	X	NO	NO	NO		NO	NO
477	29	F	5.57	6	2019-12-15 13:58:00	NO	2019-12-20 22:13:00	X	NO	NO	NO		NO	NO
478	62	M	0.07	0	2019-12-20 20:51:00	NO	2019-12-20 17:51:00	X	NO	NO	NO	NO		NO
479	53	F	22.95	23	2020-01-13 14:22:00	YES	2019-12-20 16:47:00	X	NO	NO	NO		NO	NO	NO	NO	NO		NO	NO
480	66	M	0.97	1	2019-12-20 20:22:00	NO	2019-12-20 16:31:00	X	NO	NO	NO	NO		NO
481	68	M	6.69	7	2019-12-28 09:20:00	YES	2019-12-20 15:43:00	X	NO	NO	NO	NO		NO
482	67	F	1.62	2	2019-12-22 07:40:00	NO	2019-12-20 15:09:00	X	NO	NO	NO		NO	NO
483	51	F	18.59	19	2019-12-02 08:09:00	NO	2019-12-20 14:53:00	X	NO	NO	NO		NO	NO
484	72	M	86.21	86	2019-09-25 12:03:00	NO	2019-12-20 14:21:00	X	NO	NO	NO	NO		NO
485	32	M	0.32	0	2019-12-21 11:02:00	NO	2019-12-20 12:41:00	X	NO	NO	NO	NO		NO
486	72	F	11.23	11	2019-12-31 20:20:00	YES	2019-12-20 11:33:00	X	NO	NO	NO		NO	NO
487	59	F	86.52	87	2019-09-25 03:26:00	YES	2019-12-20 11:19:00	X	NO	NO	NO		NO	NO
488	70	M	31.74	32	2019-11-19 09:22:00	NO	2019-12-20 11:00:00	X	YES	NO	NO	YES		YES
489	45	F	0.11	0	2019-12-20 16:52:00	YES	2019-12-20 10:25:00	X	YES	NO	NO		NO	NO
490	36	F	7.35	7	2019-12-29 11:55:00	NO	2019-12-20 07:39:00	X	NO	NO	NO		NO	NO
491	74	M	0.05	0	2019-12-20 08:58:00	NO	2019-12-20 06:32:00	X	NO	NO	NO	NO		NO
492	70	F	61.53	62	2019-10-19 23:25:00	YES	2019-12-19 21:45:00	X	NO	NO	NO		NO	NO
493	69	F	85.05	85	2019-09-26 09:03:00	YES	2019-12-19 21:36:00	X	NO	NO	NO		NO	NO
494	73	F	0.65	1	2019-12-19 23:54:00	NO	2019-12-19 20:58:00	X	NO	NO	YES		YES	YES
495	96	F	0.31	0	2019-12-21 21:56:00	NO	2019-12-19 20:21:00	X	NO	NO	NO		NO	NO
496	72	M	2.68	3	2019-12-22 12:25:00	NO	2019-12-19 18:30:00	X	NO	NO	NO	NO		NO
497	64	M	1.72	2	2019-12-19 23:01:00	YES	2019-12-19 17:26:00	X	NO	NO	NO	NO		NO
498	68	M	0.06	0	2019-12-20 05:50:00	NO	2019-12-19 17:01:00	X	NO	NO	NO	NO		NO
499	19	F	14.17	14	2019-12-06 10:26:00	NO	2019-12-19 16:56:00	X	NO	NO	NO		NO	NO
500	63	M	0.11	0	2019-12-20 22:15:00	NO	2019-12-19 16:18:00	X	NO	NO	NO	NO		NO
501	89	M	0.45	0	2019-12-20 10:19:00	NO	2019-12-19 14:59:00	X	NO	NO	NO	NO		NO
502	30	F	0.04	0	2019-12-19 17:30:00	NO	2019-12-19 14:10:00	X	NO	NO	NO		NO	NO
503	70	F	0.83	1	2019-12-19 15:39:00	YES	2019-12-19 14:10:00	X	NO	NO	NO		NO	NO
504	42	F	0.01	0	2019-12-19 20:25:00	NO	2019-12-19 14:07:00	X	NO	NO	NO		NO	NO	NO	NO	NO		NO	NO
505	65	M	15.01	15	2019-12-04 12:46:00	YES	2019-12-19 07:18:00	X	NO	NO	NO	NO		NO
506	59	M	1.49	1	2019-12-19 08:08:00	YES	2019-12-19 05:23:00	X	NO	NO	NO	NO		NO
507	67	F	49.35	49	2019-10-31 03:53:00	YES	2019-12-18 21:34:00	X	NO	NO	NO		NO	NO
508	53	F	3.44	3	2019-12-22 07:40:00	NO	2019-12-18 20:11:00	X	NO	NO	NO		NO	NO
509	62	F	0.47	0	2019-12-18 12:19:00	NO	2019-12-18 20:05:00	X	NO	NO	YES		YES	YES
510	64	F	60.14	60	2019-10-21 16:33:00	YES	2019-12-18 18:09:00	X	NO	NO	NO		NO	NO
511	67	M	1.56	2	2019-12-19 00:34:00	NO	2019-12-18 17:05:00	X	NO	NO	NO	NO		NO
512	90	F	0.07	0	2019-12-18 17:40:00	YES	2019-12-18 16:55:00	X	NO	NO	NO		NO	NO
513	39	M	2.46	2	2019-12-16 07:46:00	NO	2019-12-18 16:40:00	X	NO	NO	NO	NO		NO
514	81	F	57.49	57	2019-10-22 12:46:00	YES	2019-12-18 16:10:00	X	NO	NO	NO		NO	NO
515	52	M	48.96	49	2019-10-31 10:49:00	NO	2019-12-18 14:43:00	X	NO	NO	NO	NO		NO
516	88	M	14.05	14	2019-12-05 13:09:00	NO	2019-12-18 14:10:00	X	NO	NO	NO	NO		NO
517	80	M	0.43	0	2019-12-19 01:47:00	NO	2019-12-18 14:07:00	X	NO	NO	NO	NO		NO
518	47	F	0.53	1	2019-12-19 10:02:00	NO	2019-12-18 13:40:00	X	NO	NO	NO		NO	NO
519	58	M	80.24	80	2019-09-30 07:08:00	NO	2019-12-18 13:24:00	X	NO	NO	NO	NO		NO
520	61	M	25.72	26	2020-01-13 11:05:00	NO	2019-12-18 11:24:00	X	NO	NO	NO	NO		NO	NO	NO	NO	NO		NO
521	62	F	0.28	0	2019-12-19 15:00:00	YES	2019-12-18 11:02:00	X	NO	NO	NO		NO	NO
522	55	M	0.01	0	2019-12-18 19:00:00	YES	2019-12-18 10:33:00	X	NO	NO	NO	NO		NO
523	60	F	15.92	16	2019-12-04 07:42:00	NO	2019-12-18 10:28:00	X	NO	NO	NO		NO	NO
524	49	M	15.27	15	2019-12-03 08:53:00	YES	2019-12-18 10:25:00	X	NO	YES	NO	NO		NO
525	60	F	19.67	20	2020-01-09 06:45:00	NO	2019-12-18 09:55:00	X	NO	NO	YES		YES	YES
526	62	F	0.12	0	2019-12-18 17:54:00	NO	2019-12-18 09:18:00	X	NO	NO	NO		NO	NO
527	21	F	0.03	0	2019-12-18 11:42:00	NO	2019-12-18 05:31:00	X	NO	NO	NO		NO	NO
528	80	F	7.97	8	2019-12-26 14:38:00	NO	2019-12-18 03:54:00	X	NO	NO	NO		NO	NO	NO	NO	NO		NO	NO
529	79	F	21.91	22	2019-11-27 14:57:00	NO	2019-12-18 03:09:00	X	NO	NO	NO		NO	NO
530	55	M	18.57	19	2019-11-30 05:51:00	NO	2019-12-18 02:10:00	X	NO	NO	NO	NO		NO
531	81	F	0.38	0	2019-12-18 10:11:00	NO	2019-12-17 23:31:00	X	NO	NO	NO		NO	NO
532	53	M	60.03	60	2019-10-21 14:42:00	NO	2019-12-17 21:28:00	X	NO	NO	NO	NO		NO
533	86	M	0.03	0	2019-12-18 00:04:00	YES	2019-12-17 20:37:00	X	NO	NO	NO	NO		NO
534	61	F	41.26	41	2019-11-07 07:22:00	NO	2019-12-17 20:36:00	X	NO	NO	NO		NO	NO
535	79	F	0.02	0	2019-12-18 10:28:00	NO	2019-12-17 19:15:00	X	NO	NO	NO		NO	NO
536	30	M	0.01	0	2019-12-20 13:24:00	NO	2019-12-17 18:48:00	X	NO	NO	NO	NO		NO
537	59	M	22.42	22	2019-11-25 10:54:00	NO	2019-12-17 18:06:00	X	NO	NO	NO	NO		NO
538	74	F	25.98	26	2019-11-22 12:37:00	NO	2019-12-17 17:37:00	X	NO	NO	NO		NO	NO
539	55	M	13.64	14	2019-12-31 12:01:00	NO	2019-12-17 17:21:00	X	NO	NO	NO	NO		NO
540	59	M	0.06	0	2019-12-18 01:52:00	YES	2019-12-17 16:22:00	X	NO	NO	NO	NO		NO
541	67	M	68.12	68	2019-10-12 14:21:00	NO	2019-12-17 15:20:00	X	NO	NO	NO	NO		NO	NO	NO	NO	NO		NO
542	77	F	11.37	11	2019-12-06 10:19:00	NO	2019-12-17 13:02:00	X	NO	NO	YES		YES	YES
543	70	M	0.75	1	2019-12-18 11:04:00	NO	2019-12-17 12:38:00	X	NO	NO	NO	NO		NO
544	59	F	0.88	1	2019-12-18 10:17:00	YES	2019-12-17 11:52:00	X	NO	NO	NO		NO	NO
545	62	M	0.13	0	2019-12-17 14:25:00	NO	2019-12-17 11:28:00	X	NO	NO	NO	NO		NO
546	37	F	0.16	0	2019-12-17 17:26:00	NO	2019-12-17 11:07:00	X	NO	NO	NO		NO	NO
547	73	M	1.21	1	2019-12-17 10:59:00	NO	2019-12-17 10:26:00	X	NO	NO	NO	NO		NO
548	54	F	42	42	2019-11-06 17:31:00	YES	2019-12-17 09:26:00	X	YES	NO	NO		NO	NO
549	57	M	0.03	0	2019-12-17 17:58:00	YES	2019-12-17 07:15:00	X	YES	YES	YES	YES		YES	YES	YES	YES	YES		YES
550	54	M	1.48	1	2019-12-18 15:38:00	YES	2019-12-17 02:39:00	X	NO	NO	NO	NO		NO
551	59	F	0.18	0	2019-12-17 09:34:00	YES	2019-12-17 00:57:00	X	NO	NO	NO		NO	NO
552	33	F	11.72	12	2019-12-05 08:48:00	YES	2019-12-17 00:48:00	X	NO	NO	NO		NO	NO
553	66	F	1.04	1	2019-12-18 16:45:00	YES	2019-12-17 00:25:00	X	NO	NO	NO		NO	NO
554	59	M	0.4	0	2019-12-17 11:10:00	NO	2019-12-16 20:58:00	X	YES	NO	NO	NO		NO	YES	YES	NO	NO		NO
555	79	M	0.07	0	2019-12-16 21:22:00	NO	2019-12-16 20:09:00	X	NO	NO	NO	NO		NO
556	59	M	1.58	2	2019-12-16 23:06:00	YES	2019-12-16 19:09:00	X	NO	NO	NO	NO		NO
557	71	M	27.28	27	2019-11-21 13:57:00	YES	2019-12-16 17:51:00	X	NO	NO	NO	NO		NO
558	67	M	29.2	29	2019-11-18 10:06:00	YES	2019-12-16 17:07:00	X	NO	NO	NO	NO		NO
559	39	F	0.43	0	2019-12-17 09:16:00	NO	2019-12-16 16:48:00	X	NO	NO	NO		NO	NO
560	22	M	0.61	1	2019-12-16 20:17:00	NO	2019-12-16 16:39:00	X	NO	NO	NO	NO		NO
561	60	M	8.57	9	2019-12-08 09:09:00	NO	2019-12-16 15:43:00	X	NO	NO	NO	NO		NO
562	67	M	1.28	1	2019-12-16 20:19:00	NO	2019-12-16 15:31:00	X	NO	NO	NO	NO		NO
563	63	M	25.85	26	2019-11-23 16:11:00	NO	2019-12-16 15:02:00	X	NO	NO	NO	NO		NO
564	68	F	0.03	0	2019-12-17 13:49:00	YES	2019-12-16 14:49:00	X	NO	NO	NO		NO	NO
565	55	F	76.84	77	2019-10-01 13:44:00	NO	2019-12-16 14:37:00	X	NO	NO	NO		NO	NO
566	65	F	1.28	1	2019-12-17 16:00:00	YES	2019-12-16 14:22:00	X	NO	NO	NO		NO	NO
567	59	F	20.34	20	2020-01-07 02:09:00	NO	2019-12-16 11:56:00	X	NO	NO	NO		NO	NO
568	69	M	83.1	83	2019-09-24 13:46:00	YES	2019-12-16 11:40:00	X	NO	NO	NO	NO		NO	NO	NO	NO	NO		NO
569	32	M	44.23	44	2019-11-02 10:07:00	NO	2019-12-16 11:16:00	X	NO	NO	NO	NO		NO
570	40	M	0.05	0	2019-12-16 15:26:00	YES	2019-12-16 10:11:00	X	NO	NO	NO	NO		NO	NO	NO	NO	NO		NO
571	29	M	39.18	39	2019-11-07 12:08:00	NO	2019-12-16 09:49:00	X	NO	NO	NO	NO		NO
572	53	M	1.62	2	2019-12-18 07:48:00	NO	2019-12-16 08:12:00	X	NO	NO	NO	NO		NO
573	54	F	2.43	2	2019-12-19 07:29:00	NO	2019-12-16 07:14:00	X	NO	NO	NO		NO	NO	NO	NO	NO		NO	NO
574	54	M	0.28	0	2019-12-16 18:03:00	YES	2019-12-16 02:43:00	X	NO	NO	NO	NO		NO	NO	NO	NO	NO		NO
575	70	F	0.61	1	2019-12-16 02:10:00	YES	2019-12-15 22:42:00	X	NO	NO	NO		NO	NO
576	47	M	28.56	29	2019-11-17 12:10:00	YES	2019-12-15 20:21:00	X	NO	NO	NO	NO		NO
577	35	M	0.48	0	2019-12-16 15:55:00	YES	2019-12-15 20:14:00	X	YES	NO	NO	YES		YES
578	62	M	0.03	0	2019-12-15 22:49:00	NO	2019-12-15 19:54:00	X	NO	NO	NO	NO		NO
579	55	F	21.57	22	2019-11-24 10:11:00	NO	2019-12-15 18:07:00	X	NO	NO	YES		NO	NO
580	73	F	1.4	1	2019-12-17 08:03:00	NO	2019-12-15 17:29:00	X	NO	NO	NO		NO	NO
581	74	F	0.02	0	2019-12-16 00:16:00	NO	2019-12-15 16:34:00	X	YES	NO	NO		YES	YES
582	71	F	10.56	11	2019-12-05 09:21:00	NO	2019-12-15 15:37:00	X	NO	NO	NO		NO	NO
583	84	M	0.54	1	2019-12-16 11:19:00	NO	2019-12-15 14:54:00	X	NO	NO	NO	NO		NO
584	41	F	0.1	0	2019-12-15 15:33:00	NO	2019-12-15 14:20:00	X	NO	NO	NO		NO	NO
585	67	M	0.21	0	2019-12-15 17:35:00	NO	2019-12-15 13:38:00	X	NO	NO	NO	NO		NO
586	35	M	2.49	2	2019-12-18 11:54:00	NO	2019-12-15 13:03:00	X	NO	NO	NO	NO		NO
587	98	F	15.09	15	2019-11-30 16:46:00	YES	2019-12-15 12:53:00	X	NO	NO	NO		NO	NO
588	49	M	0.02	0	2019-12-15 18:26:00	NO	2019-12-15 11:12:00	X	NO	NO	NO	NO		NO	NO	NO	NO	NO		NO
589	76	M	11.1	11	2019-12-04 12:58:00	NO	2019-12-15 11:09:00	X	NO	NO	NO	NO		NO
590	38	M	0.03	0	2019-12-15 10:43:00	NO	2019-12-15 10:43:00	X	NO	NO	NO	NO		NO
591	93	F	0.26	0	2019-12-15 09:39:00	NO	2019-12-15 03:52:00	X	NO	NO	NO		NO	NO
592	75	F	0.46	0	2019-12-15 13:42:00	NO	2019-12-15 00:36:00	X	YES	NO	NO		YES	YES
593	21	M	0.08	0	2019-12-15 09:34:00	NO	2019-12-15	X	NO	NO	NO	NO		NO
594	77	M	0.35	0	2019-12-15 03:07:00	YES	2019-12-14 23:55:00	X	NO	NO	NO	NO		NO
595	55	F	23.17	23	2019-11-22 05:26:00	NO	2019-12-14 17:51:00	X	NO	NO	NO		NO	NO
596	60	F	0.36	0	2019-12-15 09:46:00	YES	2019-12-14 17:49:00	X	NO	NO	NO		NO	NO
597	74	F	0.65	1	2019-12-15 13:52:00	NO	2019-12-14 17:24:00	X	NO	NO	NO		YES	YES	NO	NO	NO		YES	YES
598	61	M	0.06	0	2019-12-14 16:05:00	NO	2019-12-14 15:21:00	X	NO	NO	NO	NO		NO
599	71	M	0.02	0	2019-12-14 19:21:00	NO	2019-12-14 15:03:00	X	NO	NO	NO	NO		NO
600	80	F	1.52	2	2019-12-16 06:07:00	YES	2019-12-14 14:43:00	X	NO	NO	NO		NO	NO
601	65	F	27.06	27	2019-11-17 20:01:00	NO	2019-12-14 14:16:00	X	NO	NO	NO		NO	NO	NO	NO	NO		NO	NO
602	80	F	0.01	0	2019-12-14 17:18:00	NO	2019-12-14 13:00:00	X	NO	NO	NO		NO	NO
603	73	F	1.48	1	2019-12-14 17:30:00	NO	2019-12-14 12:19:00	X	NO	NO	NO		NO	NO
604	73	F	0.11	0	2019-12-14 15:15:00	NO	2019-12-14 11:27:00	X	NO	NO	NO		NO	NO
605	64	M	0.16	0	2019-12-14 12:32:00	YES	2019-12-14 09:37:00	X	NO	NO	NO	NO		NO
606	29	F	58.35	58	2019-10-17 08:06:00	NO	2019-12-14 08:04:00	X	NO	NO	NO		NO	NO
607	84	F	0.09	0	2019-12-14 13:17:00	NO	2019-12-14 06:48:00	X	NO	NO	NO		NO	NO
608	63	M	88.3	88	2019-09-17 06:50:00	NO	2019-12-14 06:29:00	X	NO	NO	NO	NO		NO
609	36	F	0.01	0	2019-12-14 17:56:00	NO	2019-12-14 05:58:00	X	NO	NO	NO		NO	NO	NO	YES	NO		NO	NO
610	25	F	0.18	0	2019-12-14 08:57:00	NO	2019-12-14 02:45:00	X	NO	NO	NO		NO	NO
611	59	F	1.96	2	2019-12-12 11:32:00	YES	2019-12-14 01:56:00	X	NO	NO	NO		NO	NO
612	75	M	0.2	0	2019-12-14 10:06:00	NO	2019-12-13 23:18:00	X	NO	NO	NO	NO		NO
613	54	F	0.21	0	2019-12-14 17:50:00	NO	2019-12-13 23:17:00	X	NO	NO	NO		NO	NO
614	61	F	12.87	13	2019-12-27 07:25:00	NO	2019-12-13 20:34:00	X	NO	NO	NO		NO	NO
615	63	M	4.71	5	2019-12-18 14:27:00	NO	2019-12-13 18:00:00	X	NO	NO	NO	NO		NO
616	66	M	0.39	0	2019-12-15 06:55:00	YES	2019-12-13 17:37:00	X	NO	NO	NO	NO		NO
617	77	F	1.71	2	2019-12-15 12:56:00	NO	2019-12-13 16:28:00	X	NO	NO	NO		NO	NO
618	40	F	28.43	28	2019-11-15 13:48:00	NO	2019-12-13 15:54:00	X	NO	NO	NO		NO	NO
619	86	M	0.84	1	2019-12-15 11:10:00	NO	2019-12-13 14:44:00	X	NO	NO	NO	NO		NO	NO	NO	NO	NO		NO
620	72	M	56.31	56	2019-10-18 13:01:00	YES	2019-12-13 14:29:00	X	NO	NO	NO	NO		NO
621	71	F	69.19	69	2019-10-06 09:41:00	YES	2019-12-13 13:54:00	X	NO	NO	NO		NO	NO
622	61	F	0.74	1	2019-12-14 07:29:00	YES	2019-12-13 13:33:00	X	NO	NO	NO		NO	NO
623	64	M	5.16	5	2019-12-19 23:01:00	YES	2019-12-13 13:10:00	X	NO	NO	NO	NO		NO
624	73	F	0.3	0	2019-12-13 15:56:00	YES	2019-12-13 13:09:00	X	NO	NO	NO		NO	NO
625	68	M	1.91	2	2019-12-16 10:45:00	NO	2019-12-13 12:30:00	X	NO	NO	NO	NO		NO
626	64	F	0.04	0	2019-12-13 21:12:00	YES	2019-12-13 10:57:00	X	YES	NO	NO		YES	YES
627	68	F	46	46	2019-10-28 14:21:00	NO	2019-12-13 08:39:00	X	NO	NO	NO		NO	NO	NO	NO	NO		NO	NO
628	52	F	3.17	3	2019-12-16 21:11:00	NO	2019-12-13 08:07:00	X	NO	NO	NO		NO	NO
629	75	F	23.08	23	2019-11-20 11:00:00	YES	2019-12-13 07:41:00	X	NO	NO	NO		NO	NO
630	71	M	0.11	0	2019-12-13 07:21:00	YES	2019-12-13 05:31:00	X	YES	YES	NO	YES		YES
631	75	F	0.29	0	2019-12-13 06:05:00	NO	2019-12-13 01:46:00	X	NO	NO	NO		NO	NO
632	87	F	0.63	1	2019-12-13 06:09:00	NO	2019-12-12 23:54:00	X	NO	NO	NO		NO	NO
633	79	F	0.96	1	2019-12-14 08:31:00	NO	2019-12-12 23:15:00	X	NO	NO	NO		NO	NO
634	80	F	0.44	0	2019-12-13 00:41:00	NO	2019-12-12 22:43:00	X	NO	NO	NO		NO	NO
635	62	M	46.15	46	2019-10-28 08:05:00	NO	2019-12-12 22:29:00	X	NO	NO	NO	NO		NO
636	32	F	13.59	14	2019-11-30 02:16:00	NO	2019-12-12 22:16:00	X	NO	NO	NO		NO	NO
637	65	M	31.36	31	2020-01-13 09:18:00	YES	2019-12-12 19:48:00	X	NO	NO	NO	NO		NO
638	69	F	0.55	1	2019-12-13 11:10:00	NO	2019-12-12 19:42:00	X	NO	NO	YES		NO	NO
639	26	F	23.29	23	2020-01-05 06:22:00	NO	2019-12-12 17:25:00	X	NO	NO	NO		NO	NO
640	70	M	35.54	36	2019-11-07 08:44:00	NO	2019-12-12 16:52:00	X	NO	NO	NO	NO		NO
641	63	F	85.63	86	2019-09-18 10:13:00	YES	2019-12-12 15:05:00	X	NO	NO	NO		NO	NO
642	40	F	10.79	11	2019-12-23 13:58:00	NO	2019-12-12 14:22:00	X	NO	NO	NO		NO	NO
643	58	F	58.16	58	2019-10-17	NO	2019-12-12 13:07:00	X	NO	NO	NO		NO	NO
644	93	F	39.38	39	2019-11-04 13:19:00	YES	2019-12-12 12:55:00	X	NO	NO	NO		NO	NO
645	79	F	0.06	0	2019-12-12 17:14:00	NO	2019-12-12 12:46:00	X	NO	NO	NO		NO	NO
646	69	F	0.05	0	2019-12-12 17:20:00	YES	2019-12-12 12:22:00	X	NO	NO	NO		NO	NO
647	75	F	30.43	30	2019-11-12 10:13:00	NO	2019-12-12 10:51:00	X	NO	NO	NO		NO	NO
648	48	F	0.89	1	2019-12-13 09:36:00	NO	2019-12-12 10:37:00	X	NO	NO	NO		NO	NO
649	48	M	0.39	0	2019-12-13 08:23:00	YES	2019-12-12 10:36:00	X	NO	NO	NO	NO		NO
650	89	F	0.74	1	2019-12-13 11:52:00	YES	2019-12-12 10:34:00	X	NO	NO	NO		NO	NO
651	64	M	26.96	27	2020-01-08 12:53:00	YES	2019-12-12 05:47:00	X	NO	NO	NO	NO		NO	NO	NO	NO	NO		NO
652	69	F	0.5	1	2019-12-12 04:06:00	NO	2019-12-11 22:27:00	X	NO	NO	NO		NO	NO
653	88	F	0.03	0	2019-12-11 22:09:00	NO	2019-12-11 22:09:00	X	NO	NO	YES		YES	YES
654	53	M	0.03	0	2019-12-14 09:34:00	NO	2019-12-11 20:26:00	X	NO	NO	NO	YES		YES	NO	NO	NO	YES		YES
655	50	M	85.88	86	2019-09-19 13:16:00	NO	2019-12-11 19:52:00	X	NO	NO	NO	NO		NO
656	77	F	2.06	2	2019-12-09 19:25:00	NO	2019-12-11 18:03:00	X	NO	NO	NO		NO	NO
657	37	M	7.29	7	2019-12-19 12:09:00	NO	2019-12-11 16:51:00	X	NO	NO	NO	NO		NO
658	64	M	30.37	30	2019-11-11 14:46:00	YES	2019-12-11 16:35:00	X	NO	NO	NO	NO		NO
659	33	M	0.61	1	2019-12-12 12:34:00	YES	2019-12-11 15:09:00	X	NO	NO	NO	NO		NO
660	79	M	0.41	0	2019-12-12 10:37:00	YES	2019-12-11 15:01:00	X	NO	NO	NO	NO		NO
661	68	F	68.55	69	2019-10-04 07:14:00	NO	2019-12-11 14:55:00	X	NO	NO	NO		NO	NO
662	51	F	0.6	1	2019-12-13 13:02:00	NO	2019-12-11 14:31:00	X	NO	NO	NO		NO	NO
663	67	F	12.29	12	2019-11-30 09:30:00	YES	2019-12-11 13:24:00	X	YES	NO	NO		YES	YES
664	32	F	0.25	0	2019-12-11 13:49:00	NO	2019-12-11 13:11:00	X	NO	NO	NO		NO	NO
665	95	F	0.18	0	2019-12-11 13:38:00	NO	2019-12-11 12:53:00	X	NO	NO	NO		NO	NO
666	72	M	7.09	7	2019-12-06 13:42:00	YES	2019-12-11 12:45:00	X	NO	NO	NO	NO		NO
667	65	M	18.9	19	2019-12-30 17:07:00	YES	2019-12-11 11:20:00	X	YES	NO	NO	NO		NO
668	68	M	1.74	2	2019-12-13 08:16:00	NO	2019-12-11 09:36:00	X	NO	NO	NO	NO		NO
669	43	M	11.59	12	2019-12-23 09:53:00	NO	2019-12-11 09:12:00	X	YES	NO	NO	NO		NO
670	27	F	2.17	2	2019-12-11 10:53:00	NO	2019-12-11 06:06:00	X	NO	NO	NO		NO	NO
671	59	F	1.13	1	2019-12-12 11:32:00	YES	2019-12-11 05:42:00	X	NO	NO	NO		NO	NO
672	66	F	6.93	7	2019-12-18 16:44:00	YES	2019-12-11 01:56:00	X	NO	NO	NO		NO	NO
673	66	M	33.12	33	2019-11-08 09:20:00	NO	2019-12-10 22:34:00	X	NO	NO	NO	NO		NO
674	58	F	71.88	72	2019-10-03 00:53:00	NO	2019-12-10 22:01:00	X	NO	NO	NO		NO	NO
675	89	F	0.53	1	2019-12-10 22:56:00	NO	2019-12-10 18:22:00	X	NO	NO	NO		NO	NO
676	59	M	6.62	7	2019-12-19 08:08:00	YES	2019-12-10 17:54:00	X	NO	NO	YES	NO		NO
677	96	F	0.14	0	2019-12-10 18:59:00	YES	2019-12-10 17:44:00	X	NO	YES	NO		NO	NO
678	36	F	1.58	2	2019-12-12 13:19:00	NO	2019-12-10 17:30:00	X	NO	NO	NO		NO	NO	NO	NO	NO		NO	NO
679	39	M	0.04	0	2019-12-10 20:49:00	NO	2019-12-10 15:19:00	X	NO	NO	NO	NO		NO
680	62	F	56.68	57	2019-10-14 23:49:00	NO	2019-12-10 13:56:00	X	YES	NO	NO		NO	NO
681	48	F	19.67	20	2019-12-30 11:37:00	NO	2019-12-10 13:38:00	X	NO	NO	NO		NO	NO
682	46	F	1.05	1	2019-12-12 16:53:00	YES	2019-12-10 11:52:00	X	NO	NO	YES		YES	YES
683	58	M	1.55	2	2019-12-12 14:06:00	NO	2019-12-10 11:18:00	X	NO	NO	NO	NO		NO
684	25	F	0.1	0	2019-12-10 18:29:00	NO	2019-12-10 10:24:00	X	NO	NO	NO		NO	NO
685	55	F	21.08	21	2019-12-31 14:22:00	NO	2019-12-10 08:33:00	X	NO	NO	NO		NO	NO
686	56	F	0.05	0	2019-12-12 06:04:00	NO	2019-12-10 08:24:00	X	NO	NO	NO		NO	NO
687	51	M	0.19	0	2019-12-10 13:01:00	NO	2019-12-10 05:19:00	X	YES	NO	NO	NO		NO
688	51	M	1.42	1	2019-12-10 00:48:00	NO	2019-12-10 01:56:00	X	NO	NO	NO	NO		NO
689	48	F	46.76	47	2019-10-24 10:34:00	NO	2019-12-09 23:32:00	X	NO	NO	NO		NO	NO	NO	NO	NO		NO	NO
690	78	F	0.08	0	2019-12-10 06:30:00	NO	2019-12-09 21:46:00	X	NO	NO	NO		NO	NO
691	76	F	1.45	1	2019-12-12 07:25:00	NO	2019-12-09 19:52:00	X	NO	NO	NO		NO	NO
692	66	M	33.65	34	2019-11-06 17:40:00	NO	2019-12-09 19:01:00	X	NO	NO	NO	NO		NO
693	61	M	1.44	1	2019-12-10 13:15:00	NO	2019-12-09 17:20:00	X	NO	NO	NO	NO		NO
694	83	F	1.73	2	2019-12-09 21:58:00	NO	2019-12-09 16:13:00	X	NO	NO	NO		NO	NO
695	61	M	24.02	24	2020-01-03 13:54:00	YES	2019-12-09 16:05:00	X	NO	NO	NO	NO		NO
696	31	F	30.45	30	2019-11-09 09:17:00	NO	2019-12-09 15:25:00	X	NO	NO	NO		NO	NO
697	80	F	0.27	0	2019-12-09 15:46:00	NO	2019-12-09 14:35:00	X	NO	NO	NO		NO	NO
698	72	F	0.86	1	2019-12-10 23:45:00	YES	2019-12-09 14:16:00	X	NO	NO	NO		NO	NO	NO	NO	NO		NO	NO
699	76	M	0.15	0	2019-12-10 02:00:00	NO	2019-12-09 14:16:00	X	NO	NO	NO	NO		NO	NO	NO	NO	NO		NO
700	49	M	6.46	6	2019-12-03 08:53:00	YES	2019-12-09 14:09:00	X	NO	YES	NO	NO		NO
701	69	F	0.01	0	2019-12-09 17:12:00	NO	2019-12-09 11:28:00	X	NO	NO	NO		YES	YES
702	77	F	0.05	0	2019-12-09 19:25:00	NO	2019-12-09 11:05:00	X	NO	NO	NO		NO	NO
703	78	F	0.87	1	2019-12-10 09:57:00	NO	2019-12-09 10:19:00	X	NO	NO	NO		NO	NO
704	31	M	0.15	0	2019-12-09 13:26:00	YES	2019-12-09 10:04:00	X	NO	NO	YES	NO		NO
705	64	M	18.31	18	2019-11-21 09:58:00	NO	2019-12-09 09:48:00	X	NO	NO	NO	NO		NO
706	50	F	0	0	2019-12-09 15:15:00	NO	2019-12-09 09:10:00	X	NO	NO	NO		NO	NO
707	79	F	21.04	21	2019-11-18 13:29:00	NO	2019-12-09 08:51:00	X	NO	NO	NO		NO	NO
708	28	M	1.19	1	2019-12-09 05:29:00	NO	2019-12-09 05:30:00	X	NO	NO	NO	NO		NO	NO	NO	NO	NO		NO
709	93	F	45.44	45	2019-10-25 12:47:00	NO	2019-12-09 04:15:00	X	YES	YES	NO		YES	YES
710	29	F	65.06	65	2019-10-05 21:38:00	NO	2019-12-09 03:54:00	X	NO	NO	NO		NO	NO
711	55	M	1.28	1	2019-12-09 04:11:00	YES	2019-12-09 03:13:00	X	NO	NO	NO	NO		NO
712	59	M	0.04	0	2019-12-09 06:59:00	NO	2019-12-09 02:55:00	X	YES	NO	NO	NO		NO
713	68	F	0.08	0	2019-12-09 09:26:00	NO	2019-12-09 02:28:00	X	NO	NO	NO		NO	NO	NO	NO	NO		YES	NO
714	56	F	0.03	0	2019-12-09 02:33:00	YES	2019-12-09 00:57:00	X	NO	NO	NO		NO	NO
715	64	F	27.01	27	2020-01-05 01:06:00	YES	2019-12-08 20:58:00	X	NO	NO	NO		NO	NO
716	44	F	0.07	0	2019-12-09 02:02:00	NO	2019-12-08 18:43:00	X	NO	NO	NO		NO	NO
717	94	F	1.19	1	2019-12-10 07:27:00	NO	2019-12-08 17:25:00	X	NO	NO	NO		NO	NO
718	46	M	6.82	7	2019-12-02 10:33:00	YES	2019-12-08 16:29:00	X	NO	NO	NO	NO		NO	NO	NO	NO	NO		NO
719	63	M	4.53	5	2019-12-13 09:15:00	NO	2019-12-08 15:11:00	X	NO	NO	NO	NO		NO
720	84	F	0.05	0	2019-12-08 13:51:00	NO	2019-12-08 14:09:00	X	NO	NO	NO		NO	NO
721	82	F	1.09	1	2019-12-10 08:32:00	YES	2019-12-08 13:59:00	X	NO	NO	NO		NO	NO
722	61	F	33.26	33	2019-11-05 09:50:00	NO	2019-12-08 12:29:00	X	NO	NO	NO		NO	NO	NO	NO	NO		NO	NO
723	65	M	89.13	89	2019-09-10 11:10:00	YES	2019-12-08 11:38:00	X	NO	NO	NO	NO		NO
724	68	M	19.73	20	2019-12-28 09:20:00	YES	2019-12-08 10:26:00	X	NO	NO	NO	NO		NO
725	73	M	1.85	2	2019-12-10 11:01:00	YES	2019-12-08 09:40:00	X	NO	NO	NO	NO		NO
726	60	M	0.15	0	2019-12-08 09:09:00	NO	2019-12-08 02:43:00	X	NO	NO	NO	NO		NO
727	82	F	0.45	0	2019-12-08 09:51:00	NO	2019-12-07 21:09:00	X	NO	NO	NO		NO	NO
728	51	F	32.79	33	2019-11-05 09:30:00	NO	2019-12-07 20:36:00	X	NO	NO	NO		NO	NO
729	35	F	28.49	28	2019-11-09 11:17:00	NO	2019-12-07 20:23:00	X	NO	NO	NO		NO	NO
730	42	M	1.35	1	2019-12-09 10:31:00	NO	2019-12-07 20:20:00	X	NO	NO	NO	NO		NO
731	88	F	0.37	0	2019-12-08 11:06:00	NO	2019-12-07 19:34:00	X	NO	NO	NO		NO	NO
732	39	M	0.24	0	2019-12-07 22:11:00	NO	2019-12-07 19:33:00	X	NO	NO	NO	NO		NO
733	63	F	0.01	0	2019-12-07 23:44:00	NO	2019-12-07 17:07:00	X	NO	NO	NO		YES	YES
734	39	F	2.34	2	2019-12-10 10:55:00	NO	2019-12-07 16:07:00	X	NO	NO	NO		NO	NO	NO	NO	NO		NO	NO
735	70	F	60.82	61	2019-10-08 19:24:00	NO	2019-12-07 15:53:00	X	NO	NO	NO		NO	NO
736	85	F	0.06	0	2019-12-08 21:38:00	YES	2019-12-07 15:14:00	X	NO	NO	NO		NO	NO
737	36	F	0.06	0	2019-12-07 18:35:00	NO	2019-12-07 14:37:00	X	NO	NO	NO		NO	NO
738	62	F	0.03	0	2019-12-07 19:48:00	YES	2019-12-07 14:00:00	X	NO	NO	NO		NO	NO
739	44	F	0.42	0	2019-12-08 06:55:00	NO	2019-12-07 12:17:00	X	NO	NO	NO		NO	NO
740	76	M	0.3	0	2019-12-07 12:48:00	YES	2019-12-07 11:38:00	X	NO	NO	NO	NO		NO
741	64	F	2.44	2	2019-12-09 21:37:00	NO	2019-12-07 07:22:00	X	NO	NO	NO		NO	NO
742	75	M	0.14	0	2019-12-07 02:51:00	YES	2019-12-07 02:51:00	X	NO	NO	NO	NO		NO
743	64	F	0.05	0	2019-12-07 05:25:00	NO	2019-12-07 01:45:00	X	NO	NO	NO		NO	NO
744	44	F	0.3	0	2019-12-07 13:02:00	NO	2019-12-07 00:43:00	X	NO	NO	NO		NO	NO
745	70	F	48.52	49	2019-10-19 23:25:00	YES	2019-12-07 00:37:00	X	NO	NO	NO		NO	NO
746	63	F	3.58	4	2019-12-10 15:44:00	NO	2019-12-06 23:54:00	X	NO	NO	NO		NO	NO
747	40	F	22.92	23	2019-12-30 17:27:00	NO	2019-12-06 21:26:00	X	NO	NO	NO		NO	NO	NO	NO	NO		NO	NO
748	69	M	63.9	64	2019-10-04 18:19:00	YES	2019-12-06 20:55:00	X	NO	NO	NO	NO		NO
749	65	M	25	25	2019-11-12 01:29:00	YES	2019-12-06 20:18:00	X	NO	NO	NO	NO		NO
750	41	M	7.36	7	2019-12-14 08:01:00	YES	2019-12-06 19:14:00	X	NO	NO	NO	NO		NO
751	84	F	0.19	0	2019-12-06 19:46:00	NO	2019-12-06 18:25:00	X	NO	NO	NO		NO	NO
752	55	F	12.59	13	2019-11-24 10:11:00	NO	2019-12-06 17:39:00	X	NO	NO	NO		NO	NO
753	43	F	0.05	0	2019-12-06 19:20:00	NO	2019-12-06 15:05:00	X	NO	NO	NO		NO	NO
754	51	M	0.44	0	2019-12-06 11:10:00	YES	2019-12-06 14:17:00	X	NO	NO	NO	NO		NO
755	69	F	53.04	53	2019-10-16 12:35:00	NO	2019-12-06 14:16:00	X	NO	NO	NO		NO	NO
756	76	M	11.65	12	2019-12-18 10:26:00	YES	2019-12-06 13:31:00	X	NO	NO	NO	NO		NO
757	48	F	23.64	24	2019-12-30 11:37:00	NO	2019-12-06 13:25:00	X	NO	NO	NO		NO	NO
758	53	F	20.4	20	2019-12-27 07:36:00	NO	2019-12-06 12:57:00	X	NO	NO	NO		NO	NO
759	73	M	0.11	0	2019-12-06 20:13:00	NO	2019-12-06 12:33:00	X	NO	NO	NO	NO		NO
760	29	F	0.24	0	2019-12-07 00:12:00	NO	2019-12-06 12:33:00	X	NO	NO	NO		NO	NO
761	54	M	85.4	85	2019-09-12 10:37:00	NO	2019-12-06 11:50:00	X	NO	NO	NO	NO		NO
762	57	M	25.84	26	2020-01-01 10:49:00	NO	2019-12-06 10:35:00	X	NO	NO	NO	NO		NO
763	52	F	0.02	0	2019-12-06 16:33:00	YES	2019-12-06 09:26:00	X	NO	NO	NO		NO	NO
764	47	F	0.11	0	2019-12-06 03:38:00	YES	2019-12-06 02:15:00	X	NO	NO	NO		YES	YES
765	45	M	0.3	0	2019-12-07 15:09:00	YES	2019-12-06 00:30:00	X	NO	NO	NO	NO		NO
766	66	M	0.31	0	2019-12-06 02:44:00	YES	2019-12-06 00:06:00	X	NO	NO	NO	NO		NO
767	29	F	69.85	70	2019-09-27 17:27:00	YES	2019-12-06 00:01:00	X	NO	NO	YES		YES	YES
768	61	M	0.39	0	2019-12-06 18:54:00	NO	2019-12-05 23:52:00	X	NO	NO	NO	NO		NO
769	59	F	9.17	9	2019-12-17 09:33:00	YES	2019-12-05 23:37:00	X	NO	NO	NO		NO	NO
770	49	F	57.92	58	2019-10-09 12:52:00	YES	2019-12-05 22:59:00	X	NO	NO	NO		NO	NO
771	50	M	0.23	0	2019-12-06 03:57:00	YES	2019-12-05 22:24:00	X	NO	NO	NO	NO		NO
772	58	M	0.84	1	2019-12-05 22:28:00	NO	2019-12-05 21:36:00	X	NO	NO	NO	NO		NO
773	40	M	1.64	2	2019-12-04 08:16:00	NO	2019-12-05 20:37:00	X	NO	NO	NO	NO		NO
774	65	F	0.07	0	2019-12-06 10:04:00	NO	2019-12-05 19:54:00	X	NO	NO	NO		NO	NO
775	64	M	44.23	44	2019-10-23 08:42:00	NO	2019-12-05 18:28:00	X	NO	NO	NO	NO		NO
776	46	F	43.09	43	2019-10-24 12:36:00	NO	2019-12-05 18:19:00	X	NO	NO	YES		YES	YES
777	68	F	0.31	0	2019-12-06 06:20:00	NO	2019-12-05 17:40:00	X	NO	NO	NO		NO	NO
778	42	M	0.24	0	2019-12-05 21:21:00	NO	2019-12-05 16:56:00	X	NO	NO	NO	NO		NO
779	59	M	0.31	0	2019-12-06 08:22:00	YES	2019-12-05 16:39:00	X	NO	NO	YES	NO		NO
780	62	F	0.2	0	2019-12-06 08:59:00	YES	2019-12-05 16:34:00	X	NO	NO	NO		NO	NO
781	54	M	55.41	55	2019-10-11 10:50:00	NO	2019-12-05 16:18:00	X	NO	NO	NO	NO		NO
782	79	F	2.56	3	2019-12-08 08:27:00	NO	2019-12-05 16:17:00	X	NO	NO	NO		NO	NO
783	67	M	0.26	0	2019-12-06 06:36:00	NO	2019-12-05 16:00:00	X	NO	NO	NO	NO		NO
784	71	M	0.44	0	2019-12-05 23:42:00	NO	2019-12-05 15:38:00	X	NO	NO	NO	NO		NO
785	49	M	5.61	6	2019-12-11 10:35:00	YES	2019-12-05 14:30:00	X	NO	NO	NO	NO		NO
786	31	M	0.07	0	2019-12-05 15:12:00	NO	2019-12-05 14:26:00	X	NO	NO	NO	NO		NO
787	74	M	45.24	45	2019-10-22 12:24:00	NO	2019-12-05 14:15:00	X	NO	NO	NO	NO		NO
788	19	F	0.09	0	2019-12-05 19:26:00	NO	2019-12-05 12:47:00	X	YES	NO	NO		NO	NO
789	60	F	3.47	3	2019-12-09 08:16:00	YES	2019-12-05 12:36:00	X	NO	NO	NO		NO	NO
790	30	M	2	2	2019-12-08 21:42:00	NO	2019-12-05 11:21:00	X	YES	YES	NO	NO		NO
791	25	F	2.05	2	2019-12-05 01:52:00	NO	2019-12-05 04:22:00	X	NO	NO	NO		NO	NO
792	47	F	26.1	26	2019-12-31 07:40:00	NO	2019-12-05 02:01:00	X	NO	NO	NO		NO	NO
793	37	M	0.27	0	2019-12-05 09:20:00	NO	2019-12-05 01:05:00	X	NO	NO	NO	NO		NO
794	78	M	0.83	1	2019-12-05 23:34:00	NO	2019-12-04 22:37:00	X	NO	NO	NO	NO		NO
795	32	F	4.51	5	2019-12-09 11:30:00	NO	2019-12-04 19:43:00	X	YES	NO	NO		NO	NO
796	76	M	0.28	0	2019-12-05 05:40:00	YES	2019-12-04 18:06:00	X	NO	NO	NO	NO		NO
797	69	F	10.41	10	2019-12-15 06:27:00	NO	2019-12-04 17:28:00	X	NO	NO	NO		NO	NO
798	55	M	2.71	3	2019-12-07 13:07:00	NO	2019-12-04 16:37:00	X	NO	NO	NO	NO		NO
799	54	M	69.83	70	2019-09-26 09:33:00	YES	2019-12-04 15:04:00	X	NO	NO	YES	NO		NO
800	55	M	86.59	87	2019-09-09 08:40:00	YES	2019-12-04 14:34:00	X	NO	NO	NO	NO		NO
801	50	F	38.71	39	2020-01-13 11:17:00	NO	2019-12-04 14:02:00	X	NO	NO	NO		NO	NO
802	25	F	0.18	0	2019-12-06 10:56:00	NO	2019-12-04 13:42:00	X	NO	NO	NO		NO	NO
803	63	M	81.4	81	2019-09-16 10:41:00	NO	2019-12-04 13:22:00	X	NO	NO	NO	NO		NO
804	88	M	0.93	1	2019-12-05 13:09:00	NO	2019-12-04 10:47:00	X	NO	NO	NO	NO		NO
805	53	F	0.17	0	2019-12-04 11:42:00	NO	2019-12-04 09:25:00	X	NO	NO	NO		NO	NO	NO	NO	NO		NO	NO
806	66	M	0.07	0	2019-12-04 15:18:00	NO	2019-12-04 08:52:00	X	NO	NO	NO	NO		NO
807	35	M	0.89	1	2019-12-04 16:29:00	NO	2019-12-04 08:40:00	X	NO	NO	NO	YES		YES
808	62	M	19.05	19	2019-11-15 10:45:00	NO	2019-12-04 08:32:00	X	NO	NO	NO	NO		NO
809	85	M	0.01	0	2019-12-04 11:33:00	YES	2019-12-04 07:13:00	X	NO	NO	NO	YES		YES
810	25	M	9.1	9	2019-11-26 08:10:00	NO	2019-12-04 05:18:00	X	YES	NO	NO	NO		NO
811	59	F	7.81	8	2019-11-26 07:01:00	YES	2019-12-03 22:34:00	X	NO	NO	NO		NO	NO
812	51	M	24.49	24	2019-11-09 14:34:00	NO	2019-12-03 22:25:00	X	YES	NO	NO	NO		NO
813	45	M	23.16	23	2019-12-27 09:40:00	YES	2019-12-03 21:12:00	X	NO	NO	NO	NO		NO
814	51	M	54	54	2019-10-11 09:38:00	NO	2019-12-03 20:46:00	X	NO	NO	NO	NO		NO
815	47	F	30.26	30	2020-01-03 11:14:00	YES	2019-12-03 19:18:00	X	NO	NO	NO		NO	NO	NO	NO	NO		NO	NO
816	84	M	8.98	9	2019-11-26 15:23:00	NO	2019-12-03 17:21:00	X	NO	NO	NO	NO		NO	NO	NO	NO	NO		NO
817	88	M	6.54	7	2019-12-10 12:58:00	YES	2019-12-03 17:06:00	X	NO	NO	NO	NO		NO
818	65	M	0.24	0	2019-12-03 17:36:00	NO	2019-12-03 16:54:00	X	NO	NO	NO	NO		NO
819	93	F	30.06	30	2019-11-04 13:19:00	YES	2019-12-03 16:25:00	X	NO	NO	NO		NO	NO
820	76	M	25.79	26	2020-01-01 10:57:00	YES	2019-12-03 15:28:00	X	YES	NO	NO	NO		NO	YES	NO	NO	NO		NO
821	50	F	22.5	23	2019-11-14 09:11:00	NO	2019-12-03 15:24:00	X	NO	NO	NO		NO	NO
822	54	M	22.89	23	2019-12-29 11:20:00	NO	2019-12-03 15:18:00	X	NO	NO	NO	NO		NO
823	31	M	31.03	31	2020-01-04 11:30:00	NO	2019-12-03 14:38:00	X	NO	YES	NO	NO		NO
824	67	M	55.14	55	2019-10-09 17:58:00	YES	2019-12-03 14:07:00	X	NO	NO	NO	NO		NO
825	54	M	68.26	68	2019-09-26 09:33:00	YES	2019-12-03 13:00:00	X	NO	NO	NO	NO		NO
826	60	M	14.3	14	2019-11-19 14:58:00	YES	2019-12-03 12:47:00	X	NO	NO	NO	NO		NO
827	65	F	0.68	1	2019-12-04 11:47:00	YES	2019-12-03 11:02:00	X	NO	NO	NO		NO	NO
828	79	M	0.69	1	2019-12-04 11:59:00	YES	2019-12-03 10:53:00	X	NO	NO	NO	NO		NO	NO	NO	NO	NO		NO
829	51	M	84.02	84	2019-09-11 09:15:00	YES	2019-12-03 10:53:00	X	NO	NO	NO	NO		NO
830	41	M	0.73	1	2019-12-04 11:29:00	NO	2019-12-03 08:54:00	X	NO	NO	NO	NO		NO
831	44	M	69.76	70	2019-09-24 19:41:00	YES	2019-12-03 08:03:00	X	NO	NO	NO	NO		NO
832	87	F	38.88	39	2020-01-11 15:17:00	YES	2019-12-03 06:11:00	X	NO	NO	NO		NO	NO
833	63	F	0.26	0	2019-12-03 12:55:00	YES	2019-12-03 05:44:00	X	NO	NO	NO		NO	NO
834	60	M	0.55	1	2019-12-03 04:10:00	YES	2019-12-02 22:40:00	X	NO	NO	NO	NO		NO
835	67	M	4.7	5	2019-12-08 13:18:00	YES	2019-12-02 22:13:00	X	NO	NO	NO	NO		NO
836	77	F	74.73	75	2019-09-19 21:39:00	YES	2019-12-02 21:34:00	X	NO	NO	YES		YES	YES	NO	NO	YES		YES	YES
837	72	M	0.63	1	2019-12-03 14:57:00	YES	2019-12-02 21:22:00	X	NO	NO	NO	NO		NO
838	36	M	0.15	0	2019-12-03 11:20:00	NO	2019-12-02 21:11:00	X	NO	NO	NO	NO		NO
839	64	M	41.52	42	2019-10-22 10:54:00	NO	2019-12-02 20:43:00	X	YES	NO	NO	NO		NO
840	42	M	17.87	18	2019-12-20 22:11:00	NO	2019-12-02 20:32:00	X	NO	NO	NO	YES		YES
841	80	F	0.07	0	2019-12-03 01:53:00	NO	2019-12-02 20:24:00	X	NO	NO	YES		YES	YES
842	41	F	0.32	0	2019-12-03 07:13:00	NO	2019-12-02 20:15:00	X	NO	NO	NO		NO	NO
843	40	M	35.2	35	2019-10-29 10:01:00	NO	2019-12-02 18:15:00	X	NO	NO	NO	NO		NO
844	65	F	20.23	20	2019-12-24 00:27:00	NO	2019-12-02 15:47:00	X	NO	NO	NO		NO	NO
845	72	F	0.64	1	2019-12-03 01:07:00	NO	2019-12-02 15:39:00	X	NO	NO	NO		NO	NO
846	61	M	0.65	1	2019-12-03 03:49:00	NO	2019-12-02 13:28:00	X	NO	NO	NO	NO		NO
847	61	F	27.84	28	2019-11-05 18:45:00	NO	2019-12-02 13:15:00	X	NO	NO	NO		NO	NO
848	63	M	0.88	1	2019-12-02 17:11:00	NO	2019-12-02 11:49:00	X	NO	NO	NO	NO		NO
849	82	F	1.15	1	2019-12-02 13:30:00	NO	2019-12-02 11:05:00	X	NO	NO	NO		NO	NO
850	82	M	0.02	0	2019-12-02 11:51:00	NO	2019-12-02 10:00:00	X	NO	NO	NO	NO		NO
851	85	M	1.55	2	2019-12-04 12:09:00	YES	2019-12-02 08:42:00	X	NO	YES	NO	NO		NO
852	57	F	15.74	16	2019-12-18 08:36:00	NO	2019-12-02 07:29:00	X	NO	NO	NO		NO	NO
853	59	F	0.36	0	2019-12-02 10:34:00	YES	2019-12-02 01:31:00	X	NO	NO	NO		NO	NO
854	77	F	2.84	3	2019-12-05 09:39:00	NO	2019-12-02 00:06:00	X	NO	NO	NO		NO	NO
855	58	M	0.38	0	2019-12-02 10:37:00	NO	2019-12-01 23:03:00	X	NO	NO	NO	NO		NO	NO	NO	NO	NO		NO
856	95	F	1.52	2	2019-12-03 16:58:00	NO	2019-12-01 23:02:00	X	NO	NO	NO		NO	NO
857	64	M	2.53	3	2019-12-05 09:15:00	NO	2019-12-01 22:59:00	X	NO	NO	NO	NO		NO
858	49	M	0.67	1	2019-12-03 08:53:00	YES	2019-12-01 22:54:00	X	YES	YES	NO	YES		YES
859	61	M	0.04	0	2019-12-02 00:01:00	YES	2019-12-01 22:21:00	X	YES	NO	NO	NO		NO
860	61	M	0.72	1	2019-12-02 04:32:00	NO	2019-12-01 22:17:00	X	NO	NO	NO	NO		NO
861	60	M	1.25	1	2019-12-02 08:19:00	YES	2019-12-01 22:03:00	X	NO	NO	NO	NO		NO
862	39	M	0.39	0	2019-12-02 02:33:00	NO	2019-12-01 19:58:00	X	NO	NO	NO	NO		NO
863	71	M	0.57	1	2019-12-02 08:07:00	NO	2019-12-01 18:39:00	X	NO	NO	NO	NO		NO
864	72	F	44.25	44	2019-10-18 17:30:00	YES	2019-12-01 18:28:00	X	NO	NO	NO		NO	NO	NO	NO	NO		NO	NO
865	59	F	0.43	0	2019-12-02 09:09:00	NO	2019-12-01 18:08:00	X	NO	NO	NO		NO	NO
866	71	F	3.52	4	2019-12-05 09:21:00	NO	2019-12-01 17:26:00	X	NO	NO	NO		NO	NO
867	47	F	0.16	0	2019-12-01 19:24:00	YES	2019-12-01 17:22:00	X	NO	NO	NO		NO	NO
868	39	F	21.97	22	2019-11-10 10:30:00	NO	2019-12-01 16:29:00	X	NO	NO	NO		NO	NO
869	54	M	35.74	36	2019-10-27 10:55:00	NO	2019-12-01 16:29:00	X	NO	NO	NO	NO		NO
870	21	M	5.17	5	2019-12-06 21:52:00	YES	2019-12-01 15:26:00	X	NO	NO	NO	NO		NO
871	72	F	2.87	3	2019-12-04 19:42:00	NO	2019-12-01 14:41:00	X	NO	NO	YES		NO	NO
872	69	F	43.62	44	2020-01-14 15:12:00	NO	2019-12-01 14:34:00	X	NO	NO	NO		NO	NO
873	69	F	37.57	38	2020-01-08 08:42:00	NO	2019-12-01 13:25:00	X	NO	NO	NO		NO	NO
874	65	F	24.58	25	2019-11-07 04:27:00	NO	2019-12-01 12:55:00	X	NO	NO	NO		NO	NO
875	29	F	16.93	17	2019-12-18 14:24:00	NO	2019-12-01 12:12:00	X	NO	NO	NO		NO	NO
876	75	M	0.02	0	2019-12-01 11:12:00	NO	2019-12-01 10:01:00	X	NO	NO	NO	NO		NO
877	77	M	38.21	38	2019-10-24 12:23:00	YES	2019-12-01 09:24:00	X	NO	NO	NO	NO		NO
878	69	M	0.27	0	2019-12-01 18:25:00	NO	2019-12-01 06:20:00	X	NO	NO	NO	NO		NO
879	52	F	1.76	2	2019-12-03 06:00:00	YES	2019-12-01 05:03:00	X	YES	NO	NO		NO	NO
880	36	M	80.87	81	2019-09-11 12:21:00	YES	2019-12-01 04:45:00	X	NO	NO	NO	NO		NO
881	91	M	0.25	0	2019-12-01 13:59:00	YES	2019-12-01 00:27:00	X	NO	NO	NO	NO		NO	NO	NO	NO	NO		NO
882	36	F	73.8	74	2019-09-18 07:48:00	NO	2019-11-30 23:39:00	X	NO	NO	NO		NO	NO
883	79	M	0.1	0	2019-12-01 03:55:00	NO	2019-11-30 22:42:00	X	NO	NO	NO	NO		NO
884	52	M	0.24	0	2019-12-01 11:11:00	YES	2019-11-30 22:28:00	X	NO	NO	NO	NO		NO
885	63	M	74.8	75	2019-09-17 06:50:00	NO	2019-11-30 21:23:00	X	NO	NO	YES	YES		YES
886	43	F	0.04	0	2019-11-30 20:37:00	NO	2019-11-30 20:17:00	X	NO	NO	NO		NO	NO
887	48	M	0.11	0	2019-12-01 04:06:00	NO	2019-11-30 17:36:00	X	NO	NO	NO	NO		NO
888	37	M	2.97	3	2019-12-03 20:12:00	NO	2019-11-30 15:25:00	X	NO	NO	NO	NO		NO
889	83	F	0.06	0	2019-11-30 21:49:00	NO	2019-11-30 13:48:00	X	NO	NO	NO		NO	NO
890	55	M	0.82	1	2019-12-01 15:38:00	YES	2019-11-30 12:55:00	X	YES	NO	NO	NO		NO
891	98	F	0.03	0	2019-11-30 16:46:00	YES	2019-11-30 12:42:00	X	NO	NO	NO		NO	NO
892	77	F	0.05	0	2019-11-30 20:40:00	NO	2019-11-30 12:40:00	X	NO	NO	NO		NO	NO
893	53	F	0.1	0	2019-11-30 16:15:00	YES	2019-11-30 12:02:00	X	NO	NO	YES		NO	NO
894	51	M	0.11	0	2019-11-30 16:22:00	NO	2019-11-30 11:55:00	X	NO	NO	NO	NO		NO
895	49	M	0.22	0	2019-12-01 13:04:00	NO	2019-11-30 11:38:00	X	NO	NO	NO	NO		NO	NO	NO	NO	NO		NO
896	75	M	0.32	0	2019-12-01 01:53:00	NO	2019-11-30 10:03:00	X	NO	NO	YES	NO		NO	NO	YES	YES	NO		NO
897	46	F	44.06	44	2019-10-17 16:38:00	YES	2019-11-30 09:37:00	X	NO	NO	NO		NO	NO
898	55	F	0.02	0	2019-11-30 14:34:00	NO	2019-11-30 08:36:00	X	NO	NO	NO		NO	NO
899	36	F	73.24	73	2019-09-18 07:48:00	NO	2019-11-30 07:49:00	X	NO	NO	NO		NO	NO
900	72	F	0.07	0	2019-11-30 16:18:00	NO	2019-11-30 06:38:00	X	NO	NO	NO		NO	NO	NO	NO	NO		NO	NO
901	55	M	0.27	0	2019-11-30 05:51:00	NO	2019-11-30 05:51:00	X	NO	NO	NO	NO		NO	NO	NO	NO	NO		NO
902	65	F	1.01	1	2019-12-01 09:57:00	YES	2019-11-30 01:26:00	X	NO	NO	NO		NO	NO
903	67	F	0.13	0	2019-11-30 09:30:00	YES	2019-11-29 23:13:00	X	YES	NO	NO		NO	NO
904	32	F	0.05	0	2019-11-30 02:16:00	NO	2019-11-29 19:51:00	X	NO	NO	NO		NO	NO
905	78	F	0.06	0	2019-11-30 06:41:00	NO	2019-11-29 17:19:00	X	NO	NO	NO		NO	NO
906	84	F	0.48	0	2019-11-30 08:16:00	YES	2019-11-29 15:31:00	X	NO	NO	NO		NO	NO
907	79	M	23.62	24	2019-12-23 08:51:00	YES	2019-11-29 15:30:00	X	NO	NO	NO	NO		NO
908	43	F	31.49	31	2019-10-29 08:27:00	YES	2019-11-29 14:40:00	X	NO	NO	NO		NO	NO
909	44	M	0	0	2019-11-29 18:51:00	YES	2019-11-29 14:03:00	X	NO	NO	NO	NO		NO
910	75	M	27.78	28	2019-11-02 08:57:00	YES	2019-11-29 13:23:00	X	NO	NO	NO	NO		NO
911	25	F	0.01	0	2019-11-29 19:25:00	NO	2019-11-29 12:59:00	X	NO	NO	NO		NO	NO
912	57	M	56.47	56	2019-10-04 07:38:00	NO	2019-11-29 12:46:00	X	NO	NO	NO	NO		NO
913	52	F	10.07	10	2019-11-19 15:42:00	NO	2019-11-29 12:32:00	X	NO	NO	NO		NO	NO	NO	NO	NO		NO	NO
914	69	F	0.74	1	2019-11-30 15:17:00	YES	2019-11-29 11:11:00	X	YES	NO	NO		NO	NO
915	49	M	3.79	4	2019-12-03 08:53:00	YES	2019-11-29 11:09:00	X	YES	NO	NO	NO		NO
916	52	F	0.17	0	2019-11-29 12:14:00	NO	2019-11-29 09:16:00	X	NO	NO	NO		NO	NO
917	33	F	0.15	0	2019-11-29 09:40:00	YES	2019-11-29 04:58:00	X	NO	NO	NO		NO	NO
918	65	M	0.28	0	2019-11-29 11:58:00	NO	2019-11-29 02:57:00	X	NO	NO	NO	NO		NO
919	67	M	56.12	56	2019-10-04 02:30:00	NO	2019-11-29 02:09:00	X	NO	NO	NO	NO		NO
920	65	M	0.34	0	2019-11-29 00:31:00	NO	2019-11-28 21:16:00	X	YES	NO	NO	NO		NO
921	72	F	13.67	14	2019-11-15 07:22:00	NO	2019-11-28 19:27:00	X	NO	NO	NO		NO	NO
922	80	M	0.13	0	2019-11-28 19:01:00	YES	2019-11-28 18:01:00	X	NO	NO	NO	NO		NO
923	31	F	72.34	72	2019-09-17 18:20:00	NO	2019-11-28 17:28:00	X	NO	NO	NO		NO	NO
924	55	F	4.44	4	2019-11-24 10:11:00	NO	2019-11-28 17:00:00	X	NO	NO	NO		NO	NO
925	63	M	0.76	1	2019-11-29 14:58:00	YES	2019-11-28 16:56:00	X	NO	NO	NO	NO		NO
926	76	F	0.04	0	2019-11-28 20:22:00	NO	2019-11-28 15:19:00	X	NO	NO	NO		NO	NO
927	85	M	4.69	5	2019-12-03 10:35:00	YES	2019-11-28 15:15:00	X	NO	NO	NO	NO		NO
928	74	M	0.35	0	2019-11-29 12:39:00	NO	2019-11-28 14:42:00	X	NO	NO	NO	NO		NO
929	30	M	0.01	0	2019-11-28 15:11:00	NO	2019-11-28 14:05:00	X	NO	NO	NO	NO		NO
930	47	F	0.52	1	2019-11-29 09:35:00	NO	2019-11-28 13:47:00	X	NO	NO	NO		NO	NO
931	82	F	3.88	4	2019-12-02 13:30:00	NO	2019-11-28 13:33:00	X	NO	NO	NO		NO	NO
932	74	M	0.61	1	2019-11-29 14:39:00	YES	2019-11-28 13:14:00	X	NO	NO	NO	NO		NO	NO	NO	NO	NO		NO
933	38	M	13.76	14	2019-12-12 10:02:00	NO	2019-11-28 11:49:00	X	NO	NO	NO	NO		NO
934	70	M	2.93	3	2019-12-01 14:32:00	NO	2019-11-28 11:47:00	X	YES	NO	NO	NO		NO	YES	YES	NO	YES		YES
935	88	F	18.38	18	2019-11-10 08:40:00	NO	2019-11-28 11:37:00	X	NO	NO	NO		NO	NO
936	72	M	2.18	2	2019-11-26 11:16:00	NO	2019-11-28 10:18:00	X	NO	NO	NO	NO		NO
937	73	M	31.14	31	2019-10-28 11:00:00	NO	2019-11-28 09:44:00	X	NO	NO	NO	NO		NO	NO	NO	NO	NO		NO
938	68	M	29.85	30	2019-12-28 09:20:00	YES	2019-11-28 06:23:00	X	NO	NO	NO	NO		NO
939	65	F	1.4	1	2019-11-29 15:53:00	NO	2019-11-28 03:14:00	X	NO	NO	NO		NO	NO
940	85	M	17.43	17	2019-11-10 19:58:00	NO	2019-11-28 02:38:00	X	NO	NO	NO	NO		NO	NO	NO	NO	NO		NO
941	49	F	0.41	0	2019-11-28 05:25:00	YES	2019-11-28 01:00:00	X	NO	NO	NO		NO	NO
942	68	M	0.38	0	2019-11-27 23:34:00	YES	2019-11-27 23:34:00	X	NO	NO	NO	NO		NO
943	71	M	6.44	6	2019-11-21 13:57:00	YES	2019-11-27 22:43:00	X	NO	NO	NO	NO		NO
944	85	F	0.11	0	2019-11-28 03:36:00	YES	2019-11-27 19:24:00	X	NO	NO	NO		NO	NO
945	68	M	0.1	0	2019-11-28 00:08:00	YES	2019-11-27 17:22:00	X	NO	NO	NO	YES		YES	NO	NO	NO	YES		YES
946	87	M	20.77	21	2019-12-18 15:19:00	NO	2019-11-27 17:04:00	X	NO	NO	NO	NO		NO
947	57	F	1.36	1	2019-11-26 12:42:00	NO	2019-11-27 17:04:00	X	NO	NO	NO		NO	NO
948	89	F	38.78	39	2019-10-20 01:41:00	NO	2019-11-27 14:36:00	X	YES	NO	NO		NO	NO	YES	NO	NO		NO	NO
949	43	F	29.4	29	2019-10-29 08:27:00	YES	2019-11-27 14:21:00	X	NO	NO	NO		YES	YES
950	64	M	0.09	0	2019-11-27 17:38:00	YES	2019-11-27 13:32:00	X	NO	NO	NO	NO		NO
951	48	M	15.46	15	2019-12-13 08:23:00	YES	2019-11-27 13:19:00	X	NO	NO	NO	NO		NO
952	50	F	12.92	13	2019-12-10 15:30:00	NO	2019-11-27 13:07:00	X	NO	NO	NO		YES	YES	NO	NO	NO		YES	YES
953	57	M	0.01	0	2019-11-27 16:38:00	YES	2019-11-27 12:51:00	X	NO	NO	NO	NO		NO
954	67	F	0.01	0	2019-11-27 18:31:00	NO	2019-11-27 12:42:00	X	NO	NO	NO		NO	NO
955	85	M	0.08	0	2019-11-27 12:54:00	NO	2019-11-27 12:15:00	X	NO	NO	NO	NO		NO
956	87	M	46.41	46	2019-10-12 12:58:00	NO	2019-11-27 11:41:00	X	NO	NO	NO	NO		NO
957	55	F	0.08	0	2019-11-28 07:18:00	NO	2019-11-27 11:25:00	X	NO	NO	NO		NO	NO
958	31	M	21.63	22	2019-12-19 09:32:00	NO	2019-11-27 10:45:00	X	YES	NO	NO	NO		NO
959	83	M	0.06	0	2019-11-27 20:43:00	YES	2019-11-27 10:07:00	X	NO	NO	NO	NO		NO
960	56	M	67.96	68	2019-09-20 15:08:00	YES	2019-11-27 07:12:00	X	NO	NO	NO	YES		YES
961	19	M	19.39	19	2019-11-08 10:21:00	NO	2019-11-27 02:06:00	X	NO	NO	NO	NO		NO
962	79	F	0.11	0	2019-11-27 09:20:00	YES	2019-11-27 00:20:00	X	NO	NO	NO		NO	NO
963	67	M	26.06	26	2019-12-23 10:57:00	NO	2019-11-27 00:07:00	X	NO	NO	NO	NO		NO
964	66	F	0.29	0	2019-11-27 09:12:00	NO	2019-11-26 22:57:00	X	NO	NO	NO		NO	NO
965	48	F	34.21	34	2019-10-24 10:34:00	NO	2019-11-26 21:56:00	X	NO	NO	NO		NO	NO	NO	NO	NO		NO	NO
966	84	F	0.05	0	2019-11-26 22:44:00	NO	2019-11-26 21:29:00	X	NO	NO	NO		NO	NO
967	60	M	42.94	43	2020-01-09 14:18:00	NO	2019-11-26 21:13:00	X	NO	NO	YES	NO		NO
968	25	M	0.4	0	2019-11-27 06:15:00	NO	2019-11-26 20:41:00	X	NO	NO	NO	NO		NO
969	86	M	0.82	1	2019-11-28 13:36:00	YES	2019-11-26 20:02:00	X	NO	NO	NO	NO		NO
970	67	F	1.04	1	2019-11-28 13:22:00	NO	2019-11-26 19:00:00	X	NO	NO	NO		NO	NO
971	65	M	78.41	78	2019-09-10 11:10:00	YES	2019-11-26 18:24:00	X	NO	NO	NO	NO		NO
972	65	M	47.14	47	2020-01-13 09:18:00	YES	2019-11-26 18:14:00	X	NO	NO	NO	NO		NO
973	64	M	47.38	47	2020-01-13 11:23:00	YES	2019-11-26 17:27:00	X	NO	NO	NO	NO		NO
974	85	M	55.59	56	2019-10-02 11:08:00	NO	2019-11-26 16:37:00	X	NO	NO	YES	NO		NO	NO	NO	YES	NO		NO
975	76	F	0.37	0	2019-11-27 10:11:00	NO	2019-11-26 15:43:00	X	NO	NO	NO		NO	NO
976	69	M	5.98	6	2019-12-03 16:43:00	NO	2019-11-26 15:09:00	X	NO	NO	NO	NO		NO
977	55	F	6.15	6	2019-12-03 21:45:00	NO	2019-11-26 14:07:00	X	NO	NO	NO		NO	NO
978	49	M	0.62	1	2019-11-27 12:44:00	YES	2019-11-26 13:56:00	X	NO	NO	NO	NO		NO	NO	NO	NO	NO		NO
979	38	M	41.65	42	2020-01-07 13:44:00	NO	2019-11-26 13:26:00	X	NO	NO	NO	NO		NO
980	66	M	0.15	0	2019-11-26 17:40:00	NO	2019-11-26 12:27:00	X	NO	NO	NO	NO		NO	NO	NO	NO	NO		NO
981	82	F	0	0	2019-11-26 14:23:00	NO	2019-11-26 11:27:00	X	NO	NO	NO		NO	NO	NO	NO	NO		NO	NO
982	37	M	5.91	6	2019-12-03 15:46:00	NO	2019-11-26 11:18:00	X	NO	NO	NO	NO		NO
983	39	F	0.37	0	2019-11-27 10:07:00	NO	2019-11-26 09:36:00	X	NO	NO	NO		NO	NO
984	64	M	8.8	9	2019-12-05 09:15:00	NO	2019-11-26 07:51:00	X	NO	NO	NO	NO		NO	NO	NO	NO	NO		NO
985	62	M	0.06	0	2019-11-26 13:41:00	YES	2019-11-26 06:21:00	X	YES	NO	NO	NO		NO
986	27	M	16.41	16	2019-11-10 03:27:00	NO	2019-11-26 01:57:00	X	NO	NO	NO	NO		NO
987	50	M	0.21	0	2019-11-26 04:06:00	YES	2019-11-26 01:00:00	X	NO	NO	NO	NO		NO
988	60	M	0.1	0	2019-11-26 12:25:00	NO	2019-11-26 00:50:00	X	NO	NO	NO	NO		NO
989	71	M	0.91	1	2019-11-26 18:43:00	YES	2019-11-25 23:43:00	X	NO	NO	NO	NO		NO
990	46	F	9.98	10	2019-12-06 09:14:00	NO	2019-11-25 23:06:00	X	NO	NO	NO		NO	NO	NO	NO	NO		NO	NO
991	68	F	0.26	0	2019-11-26 14:06:00	NO	2019-11-25 22:45:00	X	NO	NO	NO		NO	NO
992	64	F	37.07	37	2019-10-21 16:33:00	YES	2019-11-25 22:09:00	X	YES	NO	NO		NO	NO
993	64	F	0.02	0	2019-11-26 11:09:00	NO	2019-11-25 22:04:00	X	NO	NO	NO		YES	YES
994	52	F	0.39	0	2019-11-26 02:54:00	NO	2019-11-25 21:27:00	X	NO	NO	NO		NO	NO
995	60	M	1.64	2	2019-11-26 00:59:00	NO	2019-11-25 18:49:00	X	NO	NO	NO	NO		NO
996	81	F	53.69	54	2019-10-03 13:06:00	YES	2019-11-25 18:08:00	X	YES	NO	NO		YES	YES
997	83	M	0.03	0	2019-11-25 18:36:00	YES	2019-11-25 18:03:00	X	NO	NO	NO	NO		NO
998	68	M	0.73	1	2019-11-25 21:45:00	NO	2019-11-25 17:30:00	X	NO	NO	NO	NO		NO
999	78	M	0.2	0	2019-11-26 06:54:00	YES	2019-11-25 15:24:00	X	NO	NO	YES	NO		NO
1000	73	F	1	1	2019-11-25 19:26:00	YES	2019-11-25 15:06:00	X	NO	NO	NO		NO	NO	NO	NO	NO		YES	YES
1001	83	M	8.44	8	2019-12-04 08:03:00	NO	2019-11-25 14:43:00	X	NO	NO	NO	NO		NO	NO	NO	NO	NO		NO
1002	54	F	0.09	0	2019-11-25 17:13:00	NO	2019-11-25 14:17:00	X	NO	NO	NO		NO	NO
1003	71	F	0.52	1	2019-11-26 12:11:00	YES	2019-11-25 14:13:00	X	NO	NO	NO		NO	NO
1004	39	M	13.59	14	2019-12-09 14:54:00	YES	2019-11-25 13:37:00	X	NO	NO	NO	NO		NO
1005	71	F	0.02	0	2019-11-25 15:46:00	NO	2019-11-25 13:34:00	X	NO	NO	NO		NO	NO
1006	57	M	0.98	1	2019-11-25 15:30:00	NO	2019-11-25 13:31:00	X	NO	NO	NO	NO		NO
1007	52	M	0.03	0	2019-11-26 18:23:00	YES	2019-11-25 13:26:00	X	NO	NO	NO	NO		NO
1008	88	F	0.59	1	2019-11-26 10:11:00	NO	2019-11-25 13:11:00	X	NO	NO	NO		NO	NO
1009	56	M	0	0	2019-11-25 18:31:00	NO	2019-11-25 13:08:00	X	NO	NO	NO	NO		NO
1010	56	M	1.16	1	2019-11-25 17:38:00	YES	2019-11-25 12:57:00	X	NO	NO	NO	NO		NO
1011	66	M	0.17	0	2019-11-25 19:05:00	YES	2019-11-25 12:36:00	X	YES	YES	NO	NO		NO
1012	61	M	1.46	1	2019-11-25 15:06:00	NO	2019-11-25 11:55:00	X	NO	NO	NO	NO		NO
1013	62	M	0.24	0	2019-11-25 14:47:00	NO	2019-11-25 11:38:00	X	NO	NO	NO	NO		NO
1014	48	M	87.19	87	2019-08-31 16:51:00	YES	2019-11-25 11:33:00	X	NO	NO	NO	NO		NO
1015	60	F	1.07	1	2019-11-25 16:09:00	NO	2019-11-25 11:24:00	X	NO	NO	NO		NO	NO
1016	20	F	0.68	1	2019-11-25 18:03:00	NO	2019-11-25 09:19:00	X	NO	NO	NO		NO	NO	NO	NO	NO		NO	NO
1017	63	M	69.47	69	2019-09-17 06:50:00	NO	2019-11-25 04:11:00	X	NO	NO	NO	NO		NO
1018	77	M	0.06	0	2019-11-25 07:24:00	YES	2019-11-25 02:46:00	X	NO	NO	NO	NO		NO	NO	NO	NO	NO		NO
1019	83	F	1.4	1	2019-11-25 06:33:00	NO	2019-11-24 23:28:00	X	NO	NO	NO		NO	NO
1020	73	M	0.29	0	2019-11-25 03:57:00	YES	2019-11-24 21:01:00	X	NO	NO	NO	NO		NO
1021	43	F	23.55	24	2019-11-01 11:34:00	NO	2019-11-24 18:54:00	X	NO	NO	NO		NO	NO	NO	NO	NO		NO	NO
1022	64	M	1.55	2	2019-11-26 11:12:00	NO	2019-11-24 18:44:00	X	NO	NO	NO	NO		NO
1023	57	F	38.82	39	2020-01-02 15:12:00	YES	2019-11-24 15:33:00	X	NO	NO	NO		NO	NO
1024	91	F	5.75	6	2019-11-30 11:59:00	NO	2019-11-24 15:09:00	X	NO	NO	NO		NO	NO
1025	69	M	1.16	1	2019-11-25 20:09:00	NO	2019-11-24 14:15:00	X	NO	NO	NO	NO		NO
1026	34	M	0.58	1	2019-11-25 07:42:00	NO	2019-11-24 14:02:00	X	NO	NO	NO	NO		NO
1027	70	F	0.06	0	2019-11-24 15:16:00	NO	2019-11-24 13:25:00	X	NO	NO	NO		NO	NO
1028	74	F	1.37	1	2019-11-26 06:13:00	NO	2019-11-24 13:16:00	X	NO	NO	NO		NO	NO
1029	41	M	0.01	0	2019-11-24 19:00:00	NO	2019-11-24 12:52:00	X	NO	NO	NO	NO		NO
1030	60	M	44.28	44	2019-10-11 13:14:00	NO	2019-11-24 12:09:00	X	NO	NO	NO	NO		NO
1031	61	F	0.01	0	2019-11-24 14:51:00	NO	2019-11-24 10:12:00	X	YES	YES	NO		YES	YES
1032	68	M	0	0	2019-11-24 16:25:00	YES	2019-11-24 09:58:00	X	NO	NO	NO	NO		NO
1033	80	M	0.02	0	2019-11-24 18:28:00	NO	2019-11-24 09:35:00	X	NO	NO	NO	NO		NO
1034	62	M	0.04	0	2019-11-24 09:24:00	YES	2019-11-24 07:40:00	X	NO	NO	NO	NO		NO	NO	NO	NO	NO		NO
1035	73	M	0.03	0	2019-11-24 15:24:00	YES	2019-11-24 07:12:00	X	NO	NO	NO	NO		NO
1036	32	F	0.01	0	2019-11-24 09:19:00	NO	2019-11-24 04:49:00	X	NO	NO	NO		NO	NO
1037	55	M	30.62	31	2019-12-26 11:34:00	YES	2019-11-23 22:56:00	X	NO	NO	NO	NO		NO
1038	65	M	50.35	50	2020-01-13 09:18:00	YES	2019-11-23 21:18:00	X	NO	NO	NO	NO		NO
1039	85	F	0.23	0	2019-11-24 07:25:00	NO	2019-11-23 20:37:00	X	NO	NO	NO		YES	YES
1040	55	F	0.26	0	2019-11-24 10:11:00	NO	2019-11-23 18:39:00	X	NO	NO	NO		NO	NO	NO	NO	YES		NO	NO
1041	78	F	0.32	0	2019-11-23 10:30:00	YES	2019-11-23 16:48:00	X	NO	NO	NO		NO	NO
1042	84	M	2.37	2	2019-11-26 07:25:00	NO	2019-11-23 16:20:00	X	NO	NO	NO	NO		NO
1043	63	M	0.14	0	2019-11-23 16:11:00	NO	2019-11-23 15:48:00	X	NO	NO	NO	NO		NO
1044	59	M	1.79	2	2019-11-25 14:55:00	NO	2019-11-23 13:52:00	X	NO	NO	NO	NO		NO
1045	68	F	50.75	51	2019-10-04 07:14:00	NO	2019-11-23 13:03:00	X	NO	NO	NO		NO	NO
1046	66	F	0.9	1	2019-11-24 13:56:00	NO	2019-11-23 12:13:00	X	NO	NO	NO		NO	NO
1047	59	M	1.7	2	2019-11-25 10:54:00	NO	2019-11-23 09:51:00	X	NO	NO	YES	NO		NO
1048	95	F	32.74	33	2019-12-26 11:02:00	NO	2019-11-23 09:37:00	X	NO	NO	NO		NO	NO
1049	73	F	40.76	41	2020-01-03 11:05:00	NO	2019-11-23 08:30:00	X	NO	NO	NO		NO	NO
1050	32	M	1.07	1	2019-11-24 13:23:00	NO	2019-11-23 08:20:00	X	NO	NO	NO	NO		NO
1051	31	M	59.17	59	2019-09-25 12:52:00	NO	2019-11-23 07:58:00	X	YES	YES	NO	NO		NO
1052	66	F	0.02	0	2019-11-23 12:17:00	NO	2019-11-23 06:46:00	X	NO	NO	NO		NO	NO
1053	72	F	0.33	0	2019-11-24 06:03:00	YES	2019-11-23 05:25:00	X	NO	NO	NO		NO	NO
1054	37	M	34.24	34	2019-12-27 09:26:00	NO	2019-11-23 02:57:00	X	NO	NO	NO	NO		NO
1055	69	M	2.86	3	2019-11-26 16:32:00	NO	2019-11-23 01:13:00	X	YES	NO	NO	NO		NO
1056	74	F	0.06	0	2019-11-23 08:37:00	YES	2019-11-23 01:04:00	X	NO	NO	NO		NO	NO
1057	61	F	42.35	42	2019-10-12 11:01:00	NO	2019-11-23 00:14:00	X	YES	NO	NO		YES	YES
1058	25	F	0.48	0	2019-11-23 05:25:00	NO	2019-11-22 21:59:00	X	NO	NO	NO		NO	NO	NO	NO	NO		NO	NO
1059	49	F	58.06	58	2019-09-26 13:34:00	NO	2019-11-22 21:14:00	X	NO	NO	NO		NO	NO	NO	NO	NO		NO	NO
1060	49	M	71.05	71	2019-09-13 13:35:00	NO	2019-11-22 20:17:00	X	NO	NO	NO	NO		NO
1061	62	F	48.55	49	2020-01-10 13:16:00	NO	2019-11-22 18:07:00	X	NO	NO	NO		NO	NO
1062	65	F	2.66	3	2019-11-25 15:00:00	NO	2019-11-22 17:52:00	X	NO	NO	NO		NO	NO
1063	77	F	72.51	73	2019-09-11 11:00:00	NO	2019-11-22 17:44:00	X	NO	NO	NO		NO	NO	NO	NO	NO		NO	NO
1064	74	M	0.73	1	2019-11-22 23:38:00	NO	2019-11-22 17:43:00	X	NO	NO	NO	NO		NO
1065	64	F	49.8	50	2019-10-05 00:26:00	NO	2019-11-22 16:50:00	X	NO	NO	YES		NO	NO	NO	NO	YES		NO	NO
1066	81	F	5.73	6	2019-11-17 04:21:00	YES	2019-11-22 16:19:00	X	NO	NO	NO		NO	NO
1067	87	F	4.49	4	2019-11-27 07:50:00	NO	2019-11-22 16:19:00	X	NO	NO	NO		NO	NO
1068	39	F	13.09	13	2019-11-10 10:30:00	NO	2019-11-22 14:59:00	X	NO	NO	NO		NO	NO
1069	75	F	0.07	0	2019-11-22 19:54:00	YES	2019-11-22 14:32:00	X	NO	NO	NO		NO	NO
1070	31	F	22.86	23	2019-12-16 07:50:00	NO	2019-11-22 13:32:00	X	NO	NO	NO		NO	NO
1071	65	M	22.3	22	2019-10-31 10:24:00	NO	2019-11-22 12:32:00	X	NO	NO	NO	NO		NO
1072	36	F	1.8	2	2019-11-24 11:58:00	NO	2019-11-22 12:01:00	X	NO	NO	NO		NO	NO
1073	67	M	50.33	50	2019-10-04 02:30:00	NO	2019-11-22 11:36:00	X	NO	NO	NO	NO		NO
1074	74	M	1.06	1	2019-11-22 14:58:00	YES	2019-11-22 10:09:00	X	NO	NO	NO	NO		NO	NO	NO	NO	NO		NO
1075	61	M	18.73	19	2019-12-11 10:32:00	NO	2019-11-22 09:11:00	X	NO	NO	NO	NO		NO
1076	72	F	6.9	7	2019-11-15 07:22:00	NO	2019-11-22 03:30:00	X	NO	NO	NO		NO	NO
1077	55	F	0.63	1	2019-11-22 05:26:00	NO	2019-11-21 21:18:00	X	NO	NO	NO		NO	NO
1078	59	M	0.28	0	2019-11-22 04:26:00	NO	2019-11-21 20:45:00	X	NO	NO	NO	NO		NO
1079	70	F	0.78	1	2019-11-21 22:31:00	YES	2019-11-21 17:40:00	X	NO	NO	NO		NO	NO
1080	55	M	0.76	1	2019-11-22 01:08:00	YES	2019-11-21 16:39:00	X	NO	NO	NO	NO		NO
1081	79	F	4.03	4	2019-11-27 14:57:00	NO	2019-11-21 16:38:00	X	NO	NO	NO		NO	NO	NO	NO	NO		NO	NO
1082	69	M	0.48	0	2019-11-22 08:05:00	YES	2019-11-21 16:36:00	X	NO	NO	NO	NO		NO
1083	73	M	3.61	4	2019-11-26 10:23:00	YES	2019-11-21 15:49:00	X	NO	NO	NO	NO		NO
1084	59	F	0.41	0	2019-11-22 09:21:00	YES	2019-11-21 15:46:00	X	NO	NO	NO		NO	NO	NO	NO	NO		NO	NO
1085	45	M	11.94	12	2019-11-10 01:14:00	NO	2019-11-21 15:44:00	X	NO	NO	NO	NO		NO
1086	49	M	3.8	4	2019-11-26 09:59:00	NO	2019-11-21 14:40:00	X	NO	NO	NO	NO		NO
1087	59	M	1.02	1	2019-11-22 20:37:00	NO	2019-11-21 12:11:00	X	NO	NO	NO	NO		NO
1088	95	M	0.13	0	2019-11-21 22:48:00	NO	2019-11-21 11:35:00	X	NO	NO	NO	NO		NO	NO	NO	NO	NO		NO
1089	69	F	59.97	60	2019-09-23 14:30:00	NO	2019-11-21 10:06:00	X	NO	NO	YES		YES	YES	NO	NO	YES		YES	YES
1090	59	F	45.41	45	2020-01-07 02:09:00	NO	2019-11-21 08:54:00	X	NO	NO	NO		NO	NO
1091	61	F	0.3	0	2019-11-21 10:32:00	NO	2019-11-21 04:51:00	X	NO	NO	NO		NO	NO
1092	19	F	28.88	29	2019-12-20 08:41:00	NO	2019-11-21 02:26:00	X	NO	NO	NO		NO	NO
1093	62	F	0.1	0	2019-11-21 12:39:00	NO	2019-11-21 02:07:00	X	NO	NO	NO		NO	NO
1094	62	F	0.01	0	2019-11-21 03:57:00	NO	2019-11-21 01:05:00	X	NO	NO	NO		NO	NO
1095	37	M	14.22	14	2019-12-05 09:20:00	NO	2019-11-21 01:02:00	X	NO	NO	NO	NO		NO	NO	NO	NO	NO		NO
1096	55	F	75.36	75	2019-09-06 18:01:00	NO	2019-11-21 00:15:00	X	NO	NO	NO		NO	NO
1097	79	M	36.67	37	2019-10-15 13:08:00	YES	2019-11-20 22:58:00	X	YES	NO	NO	NO		NO
1098	65	M	9.28	9	2019-11-12 10:58:00	YES	2019-11-20 21:50:00	X	NO	NO	NO	NO		NO
1099	68	F	1.46	1	2019-11-21 00:53:00	YES	2019-11-20 21:15:00	X	NO	NO	NO		NO	NO
1100	52	M	46.33	46	2020-01-06 08:20:00	NO	2019-11-20 19:34:00	X	NO	NO	NO	NO		NO	NO	NO	NO	NO		NO
1101	89	M	0.46	0	2019-11-21 07:04:00	YES	2019-11-20 17:49:00	X	NO	NO	NO	NO		NO
1102	68	F	1.75	2	2019-11-20 21:13:00	NO	2019-11-20 17:37:00	X	NO	NO	YES		YES	YES
1103	66	F	0.67	1	2019-11-21 00:45:00	NO	2019-11-20 16:39:00	X	NO	NO	NO		NO	NO
1104	30	F	0.58	1	2019-11-21 00:53:00	NO	2019-11-20 16:28:00	X	NO	NO	NO		NO	NO
1105	55	F	0.12	0	2019-11-20 13:56:00	YES	2019-11-20 13:56:00	X	NO	NO	NO		NO	NO
1106	58	M	0.02	0	2019-11-20 23:26:00	YES	2019-11-20 13:06:00	X	YES	NO	NO	NO		NO
1107	51	F	4.09	4	2019-11-25 01:31:00	NO	2019-11-20 12:27:00	X	YES	YES	YES		YES	YES
1108	61	M	35.34	35	2019-10-16 12:27:00	YES	2019-11-20 12:25:00	X	NO	NO	NO	NO		NO
1109	60	M	0	0	2019-11-20 17:45:00	YES	2019-11-20 12:00:00	X	NO	NO	NO	NO		NO
1110	50	F	9.29	9	2019-11-30 04:05:00	NO	2019-11-20 11:55:00	X	NO	NO	NO		NO	NO
1111	59	M	40.36	40	2019-10-11 07:55:00	YES	2019-11-20 11:28:00	X	NO	NO	NO	NO		NO
1112	51	F	0.15	0	2019-11-21 17:04:00	YES	2019-11-20 11:14:00	X	NO	NO	NO		NO	NO
1113	55	M	40.17	40	2019-10-12 09:40:00	YES	2019-11-20 09:30:00	X	NO	NO	NO	NO		NO
1114	56	M	0.01	0	2019-11-20 16:42:00	YES	2019-11-20 08:06:00	X	NO	NO	NO	NO		NO
1115	42	M	23.15	23	2019-10-28 12:58:00	NO	2019-11-20 01:52:00	X	NO	NO	NO	YES		YES
1116	60	M	55.79	56	2019-09-25 17:15:00	NO	2019-11-20 00:42:00	X	YES	NO	NO	NO		NO	YES	NO	NO	NO		NO
1117	43	F	15.6	16	2019-11-05 20:14:00	NO	2019-11-19 23:31:00	X	NO	NO	NO		NO	NO
1118	66	F	0.15	0	2019-11-20 12:33:00	NO	2019-11-19 23:00:00	X	NO	NO	NO		NO	NO
1119	63	M	0.78	1	2019-11-20 00:34:00	NO	2019-11-19 21:08:00	X	YES	YES	YES	NO		NO
1120	83	F	0.55	1	2019-11-20 04:00:00	NO	2019-11-19 21:05:00	X	NO	NO	NO		NO	NO
1121	64	M	27.6	28	2019-10-23 11:24:00	YES	2019-11-19 20:45:00	X	NO	NO	NO	NO		NO
1122	61	F	40.12	40	2019-10-12 11:01:00	NO	2019-11-19 19:41:00	X	YES	NO	NO		YES	YES
1123	56	M	0.22	0	2019-11-20 06:46:00	YES	2019-11-19 19:25:00	X	NO	NO	NO	NO		NO
1124	62	M	2.21	2	2019-11-17 16:22:00	NO	2019-11-19 18:20:00	X	NO	NO	NO	NO		NO
1125	80	M	0.92	1	2019-11-19 20:32:00	NO	2019-11-19 17:03:00	X	NO	NO	YES	NO		NO
1126	72	F	23.11	23	2019-10-28 09:41:00	YES	2019-11-19 16:22:00	X	NO	NO	NO		YES	YES
1127	80	M	8.22	8	2019-11-12 06:04:00	NO	2019-11-19 16:22:00	X	NO	NO	YES	NO		NO
1128	59	F	12.61	13	2019-12-02 10:34:00	YES	2019-11-19 15:59:00	X	NO	NO	NO		NO	NO	NO	NO	NO		NO	NO
1129	56	F	15.05	15	2019-11-05 15:07:00	NO	2019-11-19 15:54:00	X	NO	NO	NO		NO	NO
1130	82	M	0.13	0	2019-11-19 21:56:00	NO	2019-11-19 15:26:00	X	NO	NO	NO	NO		NO
1131	79	F	0.14	0	2019-11-19 20:09:00	NO	2019-11-19 15:09:00	X	NO	NO	NO		NO	NO
1132	61	M	0.72	1	2019-11-19 21:07:00	NO	2019-11-19 14:34:00	X	YES	NO	NO	NO		NO
1133	63	F	2.11	2	2019-11-21 20:58:00	NO	2019-11-19 13:58:00	X	NO	NO	NO		NO	NO
1134	66	F	66.91	67	2019-09-13 21:05:00	YES	2019-11-19 13:49:00	X	NO	NO	NO		NO	NO
1135	62	M	2	2	2019-11-17 16:22:00	NO	2019-11-19 11:59:00	X	NO	NO	NO	NO		NO
1136	59	M	6.02	6	2019-11-25 14:55:00	NO	2019-11-19 10:51:00	X	NO	NO	NO	NO		NO
1137	76	F	1.11	1	2019-11-20 15:42:00	NO	2019-11-19 10:38:00	X	NO	NO	NO		NO	NO
1138	94	F	0.63	1	2019-11-20 07:12:00	NO	2019-11-19 10:32:00	X	NO	NO	NO		NO	NO
1139	45	M	1	1	2019-11-20 10:53:00	YES	2019-11-19 09:37:00	X	NO	NO	NO	NO		NO
1140	58	M	0.14	0	2019-11-19 14:25:00	NO	2019-11-19 09:03:00	X	NO	NO	NO	NO		NO
1141	63	M	1.96	2	2019-11-19 14:40:00	YES	2019-11-19 08:43:00	X	YES	NO	NO	NO		NO	YES	NO	NO	NO		NO
1142	57	M	0.07	0	2019-11-19 08:28:00	YES	2019-11-19 07:20:00	X	NO	NO	NO	NO		NO	NO	NO	NO	NO		NO
1143	73	M	3.24	3	2019-11-22 11:09:00	NO	2019-11-19 03:42:00	X	NO	NO	YES	NO		NO
1144	22	F	43.56	44	2020-01-02 11:49:00	NO	2019-11-19 03:28:00	X	NO	NO	NO		NO	NO
1145	36	F	0.82	1	2019-11-19 19:29:00	NO	2019-11-19 01:06:00	X	NO	NO	NO		NO	NO
1146	56	M	0.33	0	2019-11-19 04:56:00	NO	2019-11-19 00:34:00	X	NO	NO	NO	NO		NO
1147	70	F	1.07	1	2019-11-20 13:00:00	YES	2019-11-18 23:06:00	X	NO	NO	NO		NO	NO
1148	75	F	1.29	1	2019-11-19 09:50:00	NO	2019-11-18 21:01:00	X	NO	NO	NO		NO	NO
1149	38	F	0.1	0	2019-11-19 16:10:00	NO	2019-11-18 20:43:00	X	NO	NO	NO		NO	NO
1150	47	F	0.82	1	2019-11-19 01:49:00	NO	2019-11-18 18:47:00	X	NO	NO	NO		NO	NO
1151	65	M	60.88	61	2019-09-19 18:07:00	NO	2019-11-18 18:41:00	X	NO	NO	NO	NO		NO
1152	55	M	2.92	3	2019-11-22 01:08:00	YES	2019-11-18 18:32:00	X	NO	NO	NO	NO		NO
1153	62	M	0.93	1	2019-11-19 13:41:00	YES	2019-11-18 17:28:00	X	NO	NO	NO	NO		NO
1154	37	F	0.47	0	2019-11-18 13:52:00	NO	2019-11-18 17:15:00	X	NO	NO	NO		NO	NO
1155	71	M	1.96	2	2019-11-19 07:41:00	NO	2019-11-18 16:41:00	X	NO	NO	NO	NO		NO	NO	NO	NO	NO		NO
1156	53	M	84.72	85	2019-08-26 03:27:00	YES	2019-11-18 16:38:00	X	YES	YES	YES	YES		YES
1157	79	M	0.58	1	2019-11-19 01:36:00	NO	2019-11-18 15:48:00	X	NO	NO	NO	NO		NO
1158	71	F	0.16	0	2019-11-18 16:39:00	YES	2019-11-18 15:31:00	X	NO	NO	NO		NO	NO
1159	42	M	1.08	1	2019-11-18 18:21:00	YES	2019-11-18 15:22:00	X	NO	NO	YES	YES		YES	NO	YES	YES	YES		YES
1160	35	M	0.71	1	2019-11-19 00:03:00	NO	2019-11-18 15:22:00	X	YES	NO	NO	NO		NO
1161	77	F	1.67	2	2019-11-20 11:30:00	YES	2019-11-18 15:02:00	X	NO	NO	NO		NO	NO
1162	73	F	0.9	1	2019-11-19 08:48:00	YES	2019-11-18 15:02:00	X	NO	NO	NO		NO	NO
1163	67	M	2.62	3	2019-11-22 05:50:00	NO	2019-11-18 14:23:00	X	NO	NO	NO	NO		NO
1164	69	M	11.79	12	2019-12-03 16:43:00	NO	2019-11-18 14:22:00	X	NO	NO	NO	NO		NO
1165	69	M	0.45	0	2019-11-19 10:53:00	NO	2019-11-18 14:16:00	X	YES	NO	NO	NO		NO
1166	43	F	0.03	0	2019-11-19 10:59:00	YES	2019-11-18 13:48:00	X	NO	NO	NO		NO	NO
1167	88	F	28.83	29	2019-12-18 15:34:00	NO	2019-11-18 13:13:00	X	NO	NO	YES		YES	YES
1168	79	M	10.63	11	2019-11-29 12:19:00	NO	2019-11-18 12:56:00	X	NO	NO	NO	NO		NO
1169	80	F	32.66	33	2019-12-23 08:09:00	NO	2019-11-18 12:43:00	X	NO	NO	NO		NO	NO
1170	83	F	0.71	1	2019-11-19 06:59:00	NO	2019-11-18 12:35:00	X	YES	NO	NO		NO	NO
1171	48	M	0.21	0	2019-11-18 19:37:00	NO	2019-11-18 11:49:00	X	NO	NO	NO	NO		NO
1172	67	F	35.33	35	2019-10-14 08:58:00	YES	2019-11-18 10:30:00	X	NO	NO	NO		NO	NO
1173	89	F	0.99	1	2019-11-19 20:51:00	NO	2019-11-18 10:12:00	X	NO	NO	NO		NO	NO
1174	57	F	29.67	30	2019-12-18 07:37:00	YES	2019-11-18 10:00:00	X	NO	NO	NO		NO	NO
1175	48	F	0.74	1	2019-11-18 04:37:00	NO	2019-11-18 04:37:00	X	NO	NO	NO		NO	NO
1176	80	F	2.15	2	2019-11-20 22:00:00	YES	2019-11-18 00:49:00	X	NO	NO	NO		NO	NO
1177	72	M	1.17	1	2019-11-19 08:38:00	NO	2019-11-17 22:46:00	X	NO	NO	NO	NO		NO
1178	65	F	7.11	7	2019-11-25 08:37:00	NO	2019-11-17 20:45:00	X	NO	NO	YES		YES	YES
1179	81	M	42.34	42	2019-12-30 08:16:00	YES	2019-11-17 19:59:00	X	NO	NO	NO	NO		NO
1180	60	M	1.49	1	2019-11-19 14:58:00	YES	2019-11-17 17:34:00	X	NO	NO	NO	NO		NO
1181	82	F	0.12	0	2019-11-17 20:48:00	YES	2019-11-17 16:38:00	X	NO	NO	NO		NO	NO
1182	66	F	0.02	0	2019-11-17 20:03:00	YES	2019-11-17 16:30:00	X	YES	NO	NO		YES	YES
1183	47	F	0.44	0	2019-11-18 09:33:00	YES	2019-11-17 16:07:00	X	NO	YES	NO		NO	NO
1184	66	M	0.71	1	2019-11-18 12:18:00	NO	2019-11-17 15:14:00	X	NO	NO	NO	NO		NO	NO	NO	NO	NO		NO
1185	94	F	22.46	22	2019-12-10 07:27:00	NO	2019-11-17 15:10:00	X	NO	NO	NO		NO	NO
1186	65	F	0.02	0	2019-11-17 20:01:00	NO	2019-11-17 15:09:00	X	NO	NO	NO		NO	NO
1187	47	M	24.24	24	2019-10-24 14:21:00	YES	2019-11-17 14:42:00	X	NO	NO	NO	NO		NO
1188	81	F	22.91	23	2019-10-25 23:59:00	NO	2019-11-17 13:55:00	X	NO	NO	NO		NO	NO
1189	51	M	39.53	40	2019-10-09 05:05:00	YES	2019-11-17 12:45:00	X	NO	NO	NO	NO		NO
1190	62	M	0.05	0	2019-11-17 16:22:00	NO	2019-11-17 12:39:00	X	NO	NO	NO	NO		NO
1191	55	M	0.12	0	2019-11-17 15:42:00	YES	2019-11-17 12:27:00	X	NO	NO	NO	NO		NO
1192	74	F	29.23	29	2019-10-19 12:11:00	NO	2019-11-17 11:17:00	X	NO	NO	NO		NO	NO
1193	81	F	0.39	0	2019-11-17 04:21:00	YES	2019-11-17 04:21:00	X	NO	NO	NO		NO	NO
1194	47	M	0.05	0	2019-11-17 12:10:00	YES	2019-11-17 03:24:00	X	NO	NO	NO	NO		NO
1195	77	M	0.06	0	2019-11-17 02:56:00	YES	2019-11-16 22:38:00	X	NO	NO	NO	NO		NO
1196	68	F	50.57	51	2020-01-07 06:35:00	YES	2019-11-16 22:35:00	X	YES	NO	NO		YES	YES
1197	73	F	0.06	0	2019-11-16 18:54:00	NO	2019-11-16 15:17:00	X	NO	NO	NO		NO	NO	NO	NO	NO		NO	NO
1198	50	M	0.66	1	2019-11-17 21:47:00	YES	2019-11-16 14:49:00	X	NO	NO	NO	NO		NO
1199	52	F	0.01	0	2019-11-16 20:17:00	NO	2019-11-16 13:57:00	X	NO	NO	NO		NO	NO
1200	72	M	0.01	0	2019-11-16 19:10:00	YES	2019-11-16 09:58:00	X	NO	NO	NO	NO		NO
1201	38	F	89	89	2019-08-19 15:43:00	YES	2019-11-16 09:50:00	X	NO	NO	NO		NO	NO	NO	NO	NO		NO	NO
1202	70	F	76.63	77	2019-08-31 22:17:00	NO	2019-11-16 09:33:00	X	NO	NO	NO		YES	YES
1203	57	M	0.46	0	2019-11-16 18:47:00	YES	2019-11-16 06:21:00	X	NO	NO	NO	NO		NO
1204	75	M	26.77	27	2019-12-13 08:14:00	NO	2019-11-16 05:29:00	X	NO	NO	YES	NO		NO
1205	59	M	0.08	0	2019-11-16 05:06:00	NO	2019-11-16 02:49:00	X	NO	NO	NO	NO		NO
1206	55	F	0.31	0	2019-11-16 11:17:00	NO	2019-11-15 23:26:00	X	NO	NO	NO		NO	NO
1207	50	F	0.04	0	2019-11-16 02:54:00	YES	2019-11-15 23:02:00	X	NO	NO	NO		YES	YES	NO	NO	NO		YES	YES
1208	69	F	23.19	23	2019-12-09 17:12:00	NO	2019-11-15 20:42:00	X	NO	NO	NO		YES	YES
1209	39	M	10.29	10	2019-11-26 07:08:00	YES	2019-11-15 18:38:00	X	NO	NO	NO	YES		YES
1210	57	M	0.41	0	2019-11-16 03:44:00	NO	2019-11-15 17:14:00	X	NO	NO	NO	NO		NO
1211	83	M	22.81	23	2019-10-24 03:15:00	NO	2019-11-15 16:53:00	X	NO	NO	NO	NO		NO
1212	41	M	5.53	6	2019-11-21 09:07:00	NO	2019-11-15 16:50:00	X	NO	NO	NO	NO		NO
1213	74	M	3.49	3	2019-11-19 13:45:00	NO	2019-11-15 16:09:00	X	NO	NO	YES	YES		YES	NO	NO	YES	YES		YES
1214	47	M	3.87	4	2019-11-19 14:26:00	NO	2019-11-15 15:41:00	X	NO	NO	NO	NO		NO
1215	51	M	0.27	0	2019-11-16 01:19:00	NO	2019-11-15 15:19:00	X	NO	NO	NO	NO		NO
1216	61	M	2.9	3	2019-11-19 14:23:00	NO	2019-11-15 14:52:00	X	NO	NO	NO	NO		NO
1217	63	M	15.37	15	2019-10-31 09:27:00	NO	2019-11-15 14:27:00	X	NO	NO	NO	NO		NO
1218	67	M	71.15	71	2019-09-06 12:43:00	NO	2019-11-15 13:47:00	X	NO	NO	NO	NO		NO
1219	53	M	81.59	82	2019-08-26 03:27:00	YES	2019-11-15 12:44:00	X	YES	YES	NO	YES		YES
1220	27	M	9.62	10	2019-11-25 07:59:00	NO	2019-11-15 12:33:00	X	NO	NO	NO	NO		NO
1221	41	M	0.01	0	2019-11-15 16:27:00	NO	2019-11-15 12:04:00	X	NO	NO	NO	NO		NO
1222	76	F	0.2	0	2019-11-15 14:40:00	YES	2019-11-15 09:48:00	X	NO	NO	NO		NO	NO
1223	49	M	34.89	35	2019-12-20 09:52:00	NO	2019-11-15 08:03:00	X	NO	NO	NO	NO		NO
1224	49	F	37.14	37	2019-10-09 12:52:00	YES	2019-11-15 05:13:00	X	YES	NO	NO		NO	NO
1225	64	M	0.32	0	2019-11-15 14:04:00	YES	2019-11-15 04:08:00	X	NO	NO	YES	NO		NO
1226	22	F	48.08	48	2020-01-02 11:49:00	NO	2019-11-15 01:56:00	X	NO	NO	NO		NO	NO
1227	52	F	0.08	0	2019-11-15 00:38:00	NO	2019-11-15 00:26:00	X	NO	NO	NO		NO	NO
1228	60	M	2.76	3	2019-11-18 09:12:00	NO	2019-11-15 00:09:00	X	NO	NO	NO	NO		NO
1229	55	M	1.27	1	2019-11-15 08:24:00	NO	2019-11-14 18:56:00	X	NO	NO	NO	NO		NO
1230	47	F	57.89	58	2020-01-11 19:42:00	YES	2019-11-14 18:05:00	X	NO	NO	NO		NO	NO
1231	67	F	19.63	20	2019-10-26 08:07:00	NO	2019-11-14 17:17:00	X	NO	NO	NO		NO	NO
1232	64	F	1.89	2	2019-11-16 14:22:00	NO	2019-11-14 14:41:00	X	NO	NO	NO		NO	NO
1233	67	F	10.5	11	2019-11-05 11:39:00	NO	2019-11-14 14:13:00	X	NO	NO	NO		NO	NO
1234	42	F	12.84	13	2019-11-27 15:04:00	NO	2019-11-14 13:19:00	X	NO	NO	NO		NO	NO
1235	64	F	46.71	47	2019-09-29 19:36:00	NO	2019-11-14 11:59:00	X	NO	NO	NO		NO	NO
1236	60	M	0.03	0	2019-11-15 12:21:00	NO	2019-11-14 11:55:00	X	NO	NO	NO	NO		NO
1237	64	M	0.2	0	2019-11-15 17:16:00	NO	2019-11-14 11:17:00	X	NO	NO	NO	NO		NO
1238	47	M	0.09	0	2019-11-14 22:53:00	NO	2019-11-14 11:13:00	X	NO	NO	NO	NO		NO
1239	75	M	5.95	6	2019-11-20 15:40:00	YES	2019-11-14 11:06:00	X	NO	NO	NO	NO		NO
1240	66	F	9.18	9	2019-11-05 10:45:00	NO	2019-11-14 10:50:00	X	NO	NO	NO		NO	NO
1241	30	F	0.02	0	2019-11-14 15:47:00	YES	2019-11-14 10:02:00	X	NO	NO	NO		NO	NO
1242	59	F	1.7	2	2019-11-16 10:16:00	YES	2019-11-14 09:56:00	X	NO	NO	YES		NO	NO
1243	76	F	3.92	4	2019-11-18 16:02:00	YES	2019-11-14 09:17:00	X	NO	NO	NO		NO	NO
1244	57	M	0.26	0	2019-11-14 12:29:00	YES	2019-11-14 09:10:00	X	NO	NO	NO	NO		NO
1245	95	F	7.57	8	2019-11-08 08:54:00	YES	2019-11-14 07:33:00	X	NO	NO	NO		NO	NO
1246	57	F	0.16	0	2019-11-14 12:33:00	NO	2019-11-14 07:14:00	X	NO	NO	NO		NO	NO
1247	87	F	79.34	79	2019-08-27 05:59:00	NO	2019-11-14 06:15:00	X	NO	NO	NO		NO	NO
1248	72	F	0.07	0	2019-11-14 22:58:00	NO	2019-11-13 22:42:00	X	NO	NO	NO		NO	NO	NO	NO	NO		NO	NO
1249	57	F	0.16	0	2019-11-13 20:22:00	NO	2019-11-13 19:34:00	X	NO	NO	NO		NO	NO	NO	NO	NO		NO	NO
1250	57	F	2.61	3	2019-11-17 12:13:00	NO	2019-11-13 19:17:00	X	NO	NO	NO		NO	NO
1251	68	M	0.35	0	2019-11-14 19:28:00	NO	2019-11-13 18:53:00	X	YES	YES	NO	YES		YES
1252	74	M	23.19	23	2019-10-22 12:24:00	YES	2019-11-13 18:27:00	X	YES	NO	NO	NO		NO
1253	64	F	6.51	7	2019-11-20 11:20:00	YES	2019-11-13 18:19:00	X	NO	NO	NO		NO	NO
1254	26	F	0.19	0	2019-11-14 08:18:00	NO	2019-11-13 14:45:00	X	NO	NO	NO		NO	NO
1255	71	M	0.68	1	2019-11-13 17:30:00	NO	2019-11-13 14:01:00	X	NO	NO	NO	NO		NO
1256	62	M	0.08	0	2019-11-13 17:55:00	YES	2019-11-13 13:51:00	X	NO	NO	NO	NO		NO
1257	50	M	2.37	2	2019-11-16 07:32:00	YES	2019-11-13 13:45:00	X	NO	NO	NO	NO		NO
1258	65	M	12.31	12	2019-11-26 07:37:00	NO	2019-11-13 10:12:00	X	NO	NO	NO	YES		YES
1259	64	F	1.95	2	2019-11-15 12:53:00	YES	2019-11-13 10:00:00	X	NO	NO	NO		NO	NO
1260	19	M	1.31	1	2019-11-13 07:27:00	NO	2019-11-13 06:29:00	X	YES	NO	NO	YES		YES
1261	81	F	30.04	30	2019-10-14 10:49:00	YES	2019-11-13 01:52:00	X	NO	NO	YES		YES	YES
1262	65	F	11.53	12	2019-11-25 15:00:00	NO	2019-11-13 01:12:00	X	NO	NO	NO		NO	NO
1263	61	F	0.16	0	2019-11-13 05:34:00	YES	2019-11-12 22:21:00	X	NO	NO	NO		NO	NO
1264	62	F	5.42	5	2019-11-21 07:01:00	NO	2019-11-12 21:30:00	X	NO	NO	NO		NO	NO
1265	76	F	1.67	2	2019-11-12 22:06:00	NO	2019-11-12 19:23:00	X	NO	NO	NO		NO	NO
1266	55	M	20.63	21	2019-10-23 19:05:00	YES	2019-11-12 19:16:00	X	NO	NO	NO	NO		NO
1267	31	F	8.04	8	2019-11-20 22:01:00	NO	2019-11-12 18:58:00	X	NO	NO	NO		NO	NO
1268	84	M	0.88	1	2019-11-14 10:38:00	NO	2019-11-12 17:42:00	X	NO	NO	NO	NO		NO
1269	65	F	5.19	5	2019-11-08 17:24:00	YES	2019-11-12 17:31:00	X	NO	NO	NO		NO	NO
1270	67	F	43.11	43	2019-10-01 09:57:00	YES	2019-11-12 16:54:00	X	NO	NO	NO		NO	NO
1271	50	F	0.57	1	2019-11-14 09:11:00	NO	2019-11-12 16:18:00	X	NO	NO	NO		NO	NO
1272	91	F	13.71	14	2019-10-30 17:26:00	NO	2019-11-12 16:16:00	X	NO	NO	NO		NO	NO
1273	65	M	0.06	0	2019-11-12 20:01:00	YES	2019-11-12 15:30:00	X	NO	NO	NO	NO		NO	NO	NO	NO	NO		NO
1274	47	F	6.54	7	2019-11-21 07:12:00	YES	2019-11-12 15:28:00	X	YES	YES	NO		NO	NO
1275	62	M	1.07	1	2019-11-13 17:23:00	NO	2019-11-12 15:12:00	X	YES	NO	NO	NO		NO
1276	69	M	61.68	62	2020-01-13 10:27:00	YES	2019-11-12 14:42:00	X	NO	NO	NO	NO		NO	NO	NO	NO	NO		NO
1277	64	M	0.05	0	2019-11-13 08:56:00	NO	2019-11-12 14:39:00	X	NO	NO	NO	NO		NO
1278	80	M	1.06	1	2019-11-12 16:43:00	NO	2019-11-12 14:31:00	X	NO	NO	NO	NO		NO
1279	76	M	1.83	2	2019-11-14 13:40:00	YES	2019-11-12 13:30:00	X	NO	NO	NO	NO		NO
1280	61	F	47.26	47	2019-09-26 12:45:00	NO	2019-11-12 11:17:00	X	NO	NO	NO		NO	NO
1281	40	F	1.91	2	2019-11-14 14:38:00	NO	2019-11-12 10:33:00	X	NO	NO	NO		NO	NO
1282	67	M	0.03	0	2019-11-12 09:09:00	YES	2019-11-12 08:33:00	X	NO	NO	NO	NO		NO
1283	65	F	32.9	33	2019-10-10 18:53:00	NO	2019-11-12 07:19:00	X	NO	NO	NO		NO	NO
1284	76	M	0.47	0	2019-11-13 07:36:00	YES	2019-11-12 01:42:00	X	YES	NO	NO	NO		NO
1285	65	M	1.22	1	2019-11-12 01:29:00	YES	2019-11-11 23:33:00	X	NO	NO	NO	NO		NO
1286	67	M	2.56	3	2019-11-12 04:16:00	NO	2019-11-11 22:31:00	X	NO	NO	NO	NO		NO
1287	68	F	15.15	15	2019-11-27 08:11:00	YES	2019-11-11 20:07:00	X	NO	NO	NO		YES	YES
1288	54	M	2.51	3	2019-11-15 09:41:00	NO	2019-11-11 19:56:00	X	NO	NO	NO	NO		NO
1289	77	M	0.5	1	2019-11-12 03:14:00	NO	2019-11-11 19:33:00	X	NO	NO	NO	NO		NO
1290	27	F	6.96	7	2019-11-05 18:40:00	NO	2019-11-11 19:15:00	X	NO	NO	NO		NO	NO
1291	62	M	4.8	5	2019-11-17 11:50:00	NO	2019-11-11 18:50:00	X	NO	NO	NO	NO		NO
1292	30	F	0.41	0	2019-11-12 11:34:00	NO	2019-11-11 18:32:00	X	NO	NO	NO		NO	NO
1293	62	F	2.2	2	2019-11-11 18:01:00	YES	2019-11-11 17:47:00	X	NO	NO	NO		NO	NO
1294	55	M	1.7	2	2019-11-11 15:47:00	NO	2019-11-11 15:47:00	X	NO	NO	NO	NO		NO
1295	72	F	64.2	64	2019-09-09 09:47:00	NO	2019-11-11 15:39:00	X	NO	NO	NO		NO	NO
1296	76	F	0.24	0	2019-11-12 10:27:00	YES	2019-11-11 15:38:00	X	YES	NO	NO		YES	YES
1297	39	M	1.65	2	2019-11-12 03:44:00	YES	2019-11-11 15:32:00	X	NO	NO	NO	NO		NO
1298	75	M	0.92	1	2019-11-11 17:59:00	NO	2019-11-11 14:30:00	X	NO	NO	NO	NO		NO
1299	60	M	30.24	30	2019-12-12 16:18:00	NO	2019-11-11 14:12:00	X	NO	NO	NO	NO		NO
1300	39	F	28.57	29	2019-12-10 10:55:00	NO	2019-11-11 13:39:00	X	NO	NO	NO		NO	NO
1301	79	M	0.37	0	2019-11-12 05:20:00	NO	2019-11-11 13:37:00	X	NO	NO	NO	NO		NO
1302	35	F	1.06	1	2019-11-11 16:55:00	NO	2019-11-11 13:06:00	X	NO	NO	NO		NO	NO
1303	66	M	0.13	0	2019-11-11 16:20:00	NO	2019-11-11 12:44:00	X	NO	NO	NO	NO		NO
1304	23	M	6.88	7	2019-11-18 14:52:00	NO	2019-11-11 12:36:00	X	YES	NO	NO	NO		NO
1305	65	F	0.56	1	2019-11-12 08:44:00	YES	2019-11-11 11:51:00	X	NO	NO	NO		NO	NO
1306	50	F	51.11	51	2019-09-22 18:25:00	NO	2019-11-11 11:30:00	X	NO	NO	NO		NO	NO
1307	57	M	10.71	11	2019-11-01 17:42:00	YES	2019-11-11 10:26:00	X	NO	NO	NO	NO		NO
1308	71	M	3.62	4	2019-11-15 06:22:00	NO	2019-11-11 07:47:00	X	NO	NO	NO	NO		NO
1309	63	M	0.33	0	2019-11-11 16:48:00	NO	2019-11-11 06:20:00	X	NO	NO	NO	NO		NO
1310	40	M	0.05	0	2019-11-11 07:50:00	NO	2019-11-11 06:18:00	X	NO	NO	NO	NO		NO
1311	80	M	1.02	1	2019-11-13 20:24:00	NO	2019-11-11 05:13:00	X	NO	NO	NO	NO		NO
1312	62	M	5.8	6	2019-11-17 16:22:00	NO	2019-11-11 03:33:00	X	NO	NO	NO	NO		NO
1313	80	F	0.02	0	2019-11-11 08:56:00	YES	2019-11-11 02:01:00	X	NO	NO	NO		NO	NO
1314	62	F	0.21	0	2019-11-11 10:22:00	YES	2019-11-11 01:14:00	X	NO	NO	NO		NO	NO
1315	56	M	1.08	1	2019-11-12 10:35:00	NO	2019-11-11 00:20:00	X	NO	NO	NO	NO		NO
1316	71	F	46.61	47	2019-09-25 09:14:00	NO	2019-11-10 18:02:00	X	NO	NO	NO		NO	NO
1317	56	M	0.45	0	2019-11-11 07:41:00	NO	2019-11-10 16:43:00	X	NO	NO	YES	NO		NO
1318	56	F	0.08	0	2019-11-10 15:56:00	NO	2019-11-10 15:55:00	X	NO	NO	NO		NO	NO
1319	85	M	0.02	0	2019-11-10 19:58:00	NO	2019-11-10 14:29:00	X	NO	NO	NO	NO		NO
1320	49	M	0.15	0	2019-11-10 15:44:00	NO	2019-11-10 13:52:00	X	NO	NO	NO	NO		NO
1321	54	M	0.82	1	2019-11-11 11:12:00	NO	2019-11-10 12:12:00	X	YES	NO	NO	YES		YES
1322	72	F	2.23	2	2019-11-12 20:09:00	YES	2019-11-10 11:26:00	X	NO	NO	NO		NO	NO
1323	61	F	1.44	1	2019-11-12 01:30:00	NO	2019-11-10 09:32:00	X	NO	NO	NO		NO	NO	NO	NO	NO		NO	NO
1324	44	M	0.07	0	2019-11-10 18:14:00	NO	2019-11-10 09:26:00	X	NO	NO	NO	NO		NO
1325	58	M	60.16	60	2019-09-11 10:16:00	YES	2019-11-10 07:16:00	X	NO	NO	NO	NO		NO	NO	NO	NO	NO		NO
1326	87	F	8.77	9	2019-11-01 16:58:00	YES	2019-11-10 07:08:00	X	NO	NO	NO		NO	NO
1327	56	F	67.62	68	2019-09-03 12:46:00	NO	2019-11-10 00:55:00	X	NO	NO	NO		YES	YES	NO	NO	NO		YES	YES
1328	45	M	0.03	0	2019-11-10 01:14:00	NO	2019-11-10 00:19:00	X	NO	NO	NO	NO		NO
1329	27	M	0.21	0	2019-11-10 03:27:00	NO	2019-11-09 23:55:00	X	NO	NO	NO	NO		NO
1330	87	F	1.85	2	2019-11-13 11:46:00	NO	2019-11-09 23:33:00	X	NO	NO	NO		NO	NO
1331	80	F	9.13	9	2019-11-19 06:13:00	NO	2019-11-09 23:22:00	X	NO	NO	YES		NO	NO
1332	39	M	0.01	0	2019-11-09 23:41:00	NO	2019-11-09 22:19:00	X	YES	YES	NO	NO		NO
1333	51	F	4.35	4	2019-11-15 08:14:00	YES	2019-11-09 20:26:00	X	NO	NO	YES		YES	YES
1334	72	F	0	0	2019-11-09 21:50:00	YES	2019-11-09 20:09:00	X	NO	NO	NO		NO	NO
1335	29	F	0.05	0	2019-11-09 23:16:00	NO	2019-11-09 19:16:00	X	NO	NO	NO		NO	NO
1336	46	F	57.47	57	2020-01-06 11:57:00	NO	2019-11-09 18:24:00	X	NO	NO	NO		NO	NO
1337	52	M	0.02	0	2019-11-10 01:15:00	YES	2019-11-09 17:25:00	X	NO	NO	NO	NO		NO
1338	71	M	16.7	17	2019-10-24 10:52:00	NO	2019-11-09 16:35:00	X	NO	NO	NO	NO		NO
1339	66	F	11.17	11	2019-11-21 00:45:00	NO	2019-11-09 15:54:00	X	NO	NO	NO		NO	NO
1340	68	F	37.22	37	2019-12-17 13:49:00	YES	2019-11-09 15:32:00	X	NO	NO	NO		NO	NO
1341	75	M	0.06	0	2019-11-09 18:52:00	YES	2019-11-09 13:54:00	X	NO	NO	NO	NO		NO
1342	88	F	0.65	1	2019-11-10 08:40:00	NO	2019-11-09 10:41:00	X	NO	NO	NO		NO	NO
1343	66	F	11.25	11	2019-10-29 07:48:00	NO	2019-11-09 10:31:00	X	NO	NO	NO		NO	NO
1344	23	M	0.86	1	2019-11-10 13:49:00	NO	2019-11-09 10:12:00	X	NO	NO	NO	NO		NO
1345	61	M	11.85	12	2019-10-28 20:10:00	NO	2019-11-09 09:26:00	X	NO	NO	NO	NO		NO
1346	51	F	0.05	0	2019-11-09 14:34:00	NO	2019-11-09 08:25:00	X	NO	NO	NO		NO	NO
1347	53	M	22.94	23	2019-12-02 15:49:00	NO	2019-11-09 07:58:00	X	NO	NO	NO	NO		NO
1348	60	F	0.06	0	2019-11-09 13:50:00	NO	2019-11-09 07:38:00	X	NO	NO	NO		NO	NO
1349	60	M	0.28	0	2019-11-10 10:24:00	YES	2019-11-09 06:12:00	X	NO	NO	NO	NO		NO
1350	75	M	0.2	0	2019-11-09 06:29:00	YES	2019-11-08 23:29:00	X	NO	NO	NO	NO		NO
1351	75	F	2.71	3	2019-11-06 10:43:00	YES	2019-11-08 22:50:00	X	NO	NO	NO		NO	NO
1352	35	F	0.07	0	2019-11-09 02:21:00	NO	2019-11-08 18:53:00	X	YES	NO	NO		NO	NO
1353	80	F	21.14	21	2019-10-18 21:00:00	NO	2019-11-08 18:37:00	X	NO	NO	NO		YES	YES
1354	62	M	0.4	0	2019-11-09 11:47:00	NO	2019-11-08 17:47:00	X	YES	NO	NO	YES		YES
1355	61	F	52.43	52	2019-12-31 08:07:00	NO	2019-11-08 16:17:00	X	NO	NO	NO		NO	NO
1356	75	F	3.46	3	2019-11-12 10:12:00	NO	2019-11-08 15:17:00	X	NO	NO	NO		NO	NO
1357	59	M	0.03	0	2019-11-08 21:12:00	YES	2019-11-08 15:13:00	X	NO	NO	NO	NO		NO
1358	40	F	51.93	52	2019-12-30 17:27:00	NO	2019-11-08 14:26:00	X	NO	NO	NO		NO	NO
1359	42	M	0.15	0	2019-11-08 14:38:00	NO	2019-11-08 13:58:00	X	NO	NO	NO	NO		NO
1360	41	M	0	0	2019-11-08 21:16:00	YES	2019-11-08 13:31:00	X	YES	YES	YES	YES		YES
1361	84	M	0.28	0	2019-11-08 15:59:00	NO	2019-11-08 12:32:00	X	NO	NO	NO	NO		NO
1362	35	F	0.81	1	2019-11-09 11:17:00	NO	2019-11-08 12:04:00	X	NO	NO	NO		NO	NO
1363	65	F	0.75	1	2019-11-08 17:24:00	YES	2019-11-08 12:00:00	X	NO	NO	NO		YES	YES
1364	65	M	24.21	24	2019-10-15 09:28:00	YES	2019-11-08 11:44:00	X	NO	NO	NO	NO		NO
1365	68	F	0.43	0	2019-11-08 16:32:00	NO	2019-11-08 11:07:00	X	NO	NO	NO		NO	NO
1366	21	M	0.39	0	2019-11-08 12:27:00	NO	2019-11-08 10:17:00	X	NO	NO	NO	NO		NO
1367	84	M	25.73	26	2019-10-13 19:28:00	NO	2019-11-08 10:17:00	X	NO	NO	NO	NO		NO
1368	64	M	25.82	26	2019-10-13 18:22:00	YES	2019-11-08 09:38:00	X	NO	NO	NO	NO		NO
1369	64	F	2	2	2019-11-10 10:20:00	YES	2019-11-08 07:30:00	X	NO	NO	YES		YES	YES
1370	73	M	26.38	26	2019-10-12 19:34:00	NO	2019-11-08 01:49:00	X	NO	NO	NO	NO		NO
1371	88	M	0.73	1	2019-11-07 22:28:00	NO	2019-11-07 20:27:00	X	NO	NO	NO	NO		NO
1372	65	M	0.8	1	2019-11-07 21:08:00	YES	2019-11-07 19:09:00	X	NO	NO	NO	NO		NO
1373	73	F	0.02	0	2019-11-07 19:00:00	NO	2019-11-07 18:16:00	X	NO	NO	NO		NO	NO
1374	81	F	0.02	0	2019-11-07 17:57:00	NO	2019-11-07 14:06:00	X	YES	YES	NO		YES	YES
1375	77	F	1.18	1	2019-11-07 13:13:00	NO	2019-11-07 13:06:00	X	NO	NO	NO		NO	NO
1376	66	F	0.14	0	2019-11-07 22:06:00	NO	2019-11-07 12:49:00	X	NO	NO	NO		NO	NO
1377	61	F	0.17	0	2019-11-07 13:07:00	YES	2019-11-07 11:53:00	X	NO	NO	NO		NO	NO
1378	88	F	0.12	0	2019-11-07 14:25:00	NO	2019-11-07 11:24:00	X	NO	NO	NO		NO	NO	NO	NO	NO		NO	NO
1379	50	F	1.33	1	2019-11-07 10:53:00	NO	2019-11-07 10:57:00	X	NO	NO	NO		NO	NO
1380	66	F	0.06	0	2019-11-07 14:10:00	NO	2019-11-07 10:04:00	X	NO	NO	NO		NO	NO
1381	67	M	0.03	0	2019-11-07 10:02:00	YES	2019-11-07 09:07:00	X	NO	NO	NO	NO		NO
1382	78	M	0.11	0	2019-11-07 17:16:00	YES	2019-11-07 08:53:00	X	NO	NO	NO	NO		NO	NO	NO	NO	NO		NO
1383	83	F	20.09	20	2019-10-18 11:08:00	NO	2019-11-07 06:04:00	X	NO	NO	YES		YES	YES
1384	43	F	1.02	1	2019-11-07 16:07:00	NO	2019-11-07 05:43:00	X	NO	NO	NO		NO	NO
1385	60	M	0.31	0	2019-11-07 04:39:00	NO	2019-11-07 00:46:00	X	NO	NO	NO	NO		NO
1386	55	M	16.06	16	2019-10-22 10:29:00	YES	2019-11-06 23:32:00	X	NO	NO	NO	NO		NO
1387	77	M	0.03	0	2019-11-06 21:47:00	NO	2019-11-06 21:47:00	X	NO	NO	NO	NO		NO
1388	67	M	0.23	0	2019-11-07 03:43:00	YES	2019-11-06 21:45:00	X	YES	NO	NO	YES		YES	YES	NO	NO	YES		YES
1389	72	F	0.04	0	2019-11-07 02:30:00	NO	2019-11-06 18:36:00	X	NO	NO	NO		NO	NO
1390	54	M	91.98	92	2019-08-07 01:03:00	YES	2019-11-06 18:24:00	X	NO	NO	NO	NO		NO
1391	25	M	14.53	15	2019-11-21 14:59:00	NO	2019-11-06 18:01:00	X	YES	YES	NO	NO		NO
1392	78	F	26.46	26	2019-10-11 23:28:00	YES	2019-11-06 17:57:00	X	NO	NO	NO		NO	NO
1393	69	F	0.15	0	2019-11-07 09:38:00	NO	2019-11-06 16:21:00	X	NO	NO	NO		NO	NO
1394	87	M	0.06	0	2019-11-06 22:19:00	YES	2019-11-06 16:05:00	X	NO	NO	NO	NO		NO
1395	77	M	0.12	0	2019-11-06 20:38:00	NO	2019-11-06 15:31:00	X	YES	NO	NO	NO		NO	YES	NO	NO	NO		NO
1396	91	F	7.16	7	2019-10-30 17:26:00	NO	2019-11-06 15:25:00	X	NO	NO	NO		NO	NO	NO	NO	NO		NO	NO
1397	51	F	0.62	1	2019-11-06 22:22:00	NO	2019-11-06 15:24:00	X	NO	NO	NO		NO	NO
1398	66	M	0.22	0	2019-11-07 11:23:00	NO	2019-11-06 15:20:00	X	NO	NO	NO	NO		NO	NO	NO	NO	NO		NO
1399	28	F	0.1	0	2019-11-06 15:28:00	NO	2019-11-06 15:00:00	X	NO	NO	NO		NO	NO	NO	NO	NO		NO	NO
1400	76	M	0.02	0	2019-11-06 20:11:00	NO	2019-11-06 14:57:00	X	NO	NO	NO	NO		NO
1401	77	M	23.39	23	2019-10-14 12:43:00	YES	2019-11-06 14:33:00	X	NO	NO	YES	YES		YES
1402	54	F	0.06	0	2019-11-06 17:31:00	YES	2019-11-06 14:16:00	X	NO	NO	NO		NO	NO
1403	86	M	0.47	0	2019-11-07 10:35:00	NO	2019-11-06 14:05:00	X	NO	NO	NO	NO		NO
1404	59	F	29.61	30	2019-12-06 09:31:00	NO	2019-11-06 12:44:00	X	NO	NO	NO		NO	NO
1405	73	M	0.08	0	2019-11-06 16:26:00	NO	2019-11-06 10:33:00	X	NO	NO	NO	NO		NO	NO	NO	NO	NO		NO
1406	75	F	0.29	0	2019-11-06 10:43:00	YES	2019-11-06 09:57:00	X	NO	NO	NO		NO	NO	NO	NO	NO		NO	NO
1407	66	M	0.32	0	2019-11-06 17:40:00	NO	2019-11-06 09:38:00	X	NO	NO	NO	NO		NO
1408	55	F	38.16	38	2019-09-30 09:43:00	NO	2019-11-06 09:20:00	X	NO	NO	NO		NO	NO	NO	NO	NO		NO	NO
1409	60	M	42.52	43	2019-09-24 17:59:00	NO	2019-11-06 04:26:00	X	NO	NO	NO	NO		NO
1410	73	F	11.22	11	2019-10-26 10:06:00	NO	2019-11-06 04:14:00	X	NO	NO	NO		NO	NO
1411	48	M	0.34	0	2019-11-06 02:44:00	NO	2019-11-06 02:02:00	X	NO	NO	NO	NO		NO
1412	59	M	34.13	34	2019-10-03 09:25:00	NO	2019-11-06 01:57:00	X	NO	NO	NO	NO		NO
1413	69	M	0.58	1	2019-11-06 05:35:00	YES	2019-11-05 23:26:00	X	NO	NO	NO	NO		NO
1414	47	F	0.79	1	2019-11-06 16:57:00	NO	2019-11-05 17:35:00	X	NO	NO	NO		NO	NO
1415	76	M	0.04	0	2019-11-06 02:39:00	NO	2019-11-05 16:56:00	X	NO	NO	NO	NO		NO
1416	79	M	0.44	0	2019-11-06 13:57:00	NO	2019-11-05 15:33:00	X	YES	NO	NO	YES		YES
1417	43	M	45.68	46	2019-09-22 01:48:00	NO	2019-11-05 15:26:00	X	NO	NO	NO	NO		NO	NO	NO	NO	NO		NO
1418	89	M	70.35	70	2019-08-27 12:12:00	YES	2019-11-05 14:42:00	X	YES	NO	NO	NO		NO
1419	27	F	0.78	1	2019-11-05 18:40:00	NO	2019-11-05 14:00:00	X	NO	NO	NO		NO	NO
1420	21	F	0.06	0	2019-11-05 14:10:00	NO	2019-11-05 13:58:00	X	NO	NO	NO		NO	NO
1421	25	F	25.43	25	2019-10-11 15:44:00	NO	2019-11-05 13:54:00	X	NO	NO	NO		NO	NO
1422	69	M	0.02	0	2019-11-05 16:55:00	YES	2019-11-05 13:05:00	X	NO	NO	NO	NO		NO
1423	53	M	1.18	1	2019-11-05 11:29:00	NO	2019-11-05 11:11:00	X	NO	NO	NO	NO		NO
1424	57	F	0.51	1	2019-11-06 13:20:00	NO	2019-11-05 10:49:00	X	NO	NO	NO		NO	NO	NO	NO	NO		NO	NO
1425	80	M	0.05	0	2019-11-05 17:58:00	YES	2019-11-05 09:46:00	X	NO	NO	YES	NO		NO
1426	78	M	14.12	14	2019-10-23 12:53:00	YES	2019-11-05 08:57:00	X	NO	NO	NO	NO		NO
1427	51	F	1.1	1	2019-11-05 09:30:00	NO	2019-11-05 06:40:00	X	NO	NO	NO		NO	NO
1428	66	F	2.07	2	2019-11-07 21:13:00	YES	2019-11-05 06:28:00	X	NO	NO	NO		NO	NO
1429	32	F	17.55	18	2019-11-24 09:19:00	NO	2019-11-05 04:11:00	X	NO	NO	NO		NO	NO
1430	82	M	0.47	0	2019-11-05 03:03:00	NO	2019-11-05 03:03:00	X	NO	NO	NO	NO		NO
1431	64	M	64.24	64	2020-01-08 12:53:00	YES	2019-11-05 01:51:00	X	NO	NO	NO	NO		NO
1432	69	M	19.33	19	2019-11-25 20:09:00	NO	2019-11-05 01:14:00	X	NO	YES	NO	NO		NO
1433	89	M	0.21	0	2019-11-05 09:48:00	NO	2019-11-05 00:04:00	X	YES	NO	YES	YES		YES
1434	82	F	52.41	52	2019-12-28 01:50:00	YES	2019-11-04 23:00:00	X	NO	NO	NO		NO	NO	NO	NO	NO		NO	NO
1435	77	M	0.37	0	2019-11-05 01:40:00	NO	2019-11-04 22:18:00	X	NO	NO	NO	NO		NO
1436	62	F	15.21	15	2019-11-21 07:01:00	YES	2019-11-04 21:26:00	X	NO	NO	NO		NO	NO
1437	52	M	1.45	1	2019-11-06 12:53:00	NO	2019-11-04 20:42:00	X	NO	NO	NO	NO		NO
1438	79	M	13.88	14	2019-10-23 13:00:00	YES	2019-11-04 20:06:00	X	NO	NO	NO	NO		NO
1439	87	F	58.81	59	2019-09-07 07:27:00	YES	2019-11-04 19:31:00	X	NO	NO	NO		NO	NO
1440	47	M	12.02	12	2019-11-17 12:10:00	YES	2019-11-04 18:51:00	X	NO	NO	NO	NO		NO
1441	73	M	0.08	0	2019-11-04 18:50:00	NO	2019-11-04 18:37:00	X	NO	NO	NO	NO		NO
1442	40	M	8.59	9	2019-10-27 15:50:00	NO	2019-11-04 18:17:00	X	NO	NO	NO	NO		NO
1443	64	M	0.02	0	2019-11-04 18:11:00	NO	2019-11-04 18:11:00	X	NO	NO	NO	NO		NO
1444	72	M	1.6	2	2019-11-04 17:11:00	YES	2019-11-04 16:23:00	X	NO	NO	NO	NO		NO
1445	44	M	1.97	2	2019-11-06 16:27:00	NO	2019-11-04 14:55:00	X	NO	NO	NO	NO		NO
1446	55	M	9.64	10	2019-11-14 07:49:00	YES	2019-11-04 13:52:00	X	NO	YES	NO	NO		NO
1447	58	M	6.15	6	2019-10-29 13:43:00	NO	2019-11-04 13:09:00	X	YES	YES	NO	YES		YES
1448	79	F	0.09	0	2019-11-04 17:26:00	YES	2019-11-04 12:19:00	X	NO	NO	NO		NO	NO
1449	76	M	0.3	0	2019-11-04 23:26:00	NO	2019-11-04 12:08:00	X	NO	NO	YES	NO		NO
1450	56	F	88.5	89	2019-08-08 10:21:00	NO	2019-11-04 11:44:00	X	NO	NO	NO		NO	NO
1451	63	M	0.71	1	2019-11-06 08:39:00	YES	2019-11-04 11:25:00	X	NO	NO	NO	NO		NO
1452	48	F	0.27	0	2019-11-04 16:02:00	NO	2019-11-04 10:57:00	X	NO	NO	NO		NO	NO
1453	79	F	7.88	8	2019-11-12 10:56:00	NO	2019-11-04 10:24:00	X	YES	YES	NO		NO	NO
1454	33	M	0.03	0	2019-11-04 13:40:00	YES	2019-11-04 10:04:00	X	YES	YES	YES	YES		YES
1455	59	M	42.33	42	2019-12-16 23:06:00	YES	2019-11-04 09:40:00	X	NO	NO	NO	NO		NO	NO	NO	NO	NO		NO
1456	52	M	2.02	2	2019-11-06 12:30:00	NO	2019-11-04 06:23:00	X	NO	NO	NO	NO		NO
1457	70	M	0.03	0	2019-11-04 13:00:00	NO	2019-11-04 05:19:00	X	NO	NO	NO	NO		NO
1458	63	M	33.77	34	2019-10-01 12:36:00	YES	2019-11-04 03:24:00	X	NO	NO	NO	YES		YES
1459	67	M	32.39	32	2019-10-04 02:30:00	NO	2019-11-03 23:57:00	X	NO	NO	NO	NO		NO
1460	60	F	0.08	0	2019-11-03 17:40:00	NO	2019-11-03 18:32:00	X	NO	NO	NO		NO	NO
1461	76	F	0.21	0	2019-11-04 05:18:00	YES	2019-11-03 18:28:00	X	NO	NO	NO		NO	NO
1462	79	F	0.43	0	2019-11-04 08:15:00	YES	2019-11-03 17:52:00	X	NO	NO	NO		NO	NO
1463	58	F	10.54	11	2019-10-24 18:59:00	NO	2019-11-03 17:23:00	X	NO	NO	NO		NO	NO
1464	83	F	1.45	1	2019-11-05 10:48:00	NO	2019-11-03 17:18:00	X	NO	NO	NO		NO	NO
1465	33	F	1.23	1	2019-11-04 15:52:00	NO	2019-11-03 16:23:00	X	NO	NO	NO		NO	NO
1466	43	F	1.22	1	2019-11-05 08:58:00	YES	2019-11-03 16:16:00	X	YES	YES	NO		NO	NO
1467	79	M	18.4	18	2019-10-16 10:03:00	YES	2019-11-03 14:04:00	X	NO	NO	NO	NO		NO
1468	44	F	44.49	44	2019-12-18 10:20:00	NO	2019-11-03 13:46:00	X	NO	NO	NO		NO	NO
1469	71	M	0	0	2019-11-03 19:28:00	YES	2019-11-03 12:29:00	X	YES	NO	NO	NO		NO
1470	48	M	8.88	9	2019-10-25 15:44:00	YES	2019-11-03 12:11:00	X	NO	NO	YES	YES		YES
1471	46	F	68.05	68	2019-08-27 14:51:00	NO	2019-11-03 12:09:00	X	NO	NO	NO		NO	NO
1472	67	M	0.69	1	2019-11-04 10:50:00	YES	2019-11-03 12:06:00	X	NO	NO	NO	NO		NO
1473	90	F	0.05	0	2019-11-03 12:08:00	YES	2019-11-03 11:44:00	X	NO	NO	NO		NO	NO
1474	74	M	0.11	0	2019-11-03 11:04:00	NO	2019-11-03 09:56:00	X	NO	NO	NO	NO		NO
1475	63	M	0.01	0	2019-11-03 14:04:00	NO	2019-11-03 08:47:00	X	NO	NO	NO	NO		NO
1476	81	M	0.31	0	2019-11-03 10:41:00	YES	2019-11-03 08:28:00	X	NO	NO	NO	NO		NO
1477	62	M	11.19	11	2019-10-23 09:54:00	YES	2019-11-03 07:32:00	X	NO	NO	NO	NO		NO
1478	64	M	0.14	0	2019-11-03 11:12:00	NO	2019-11-03 07:08:00	X	NO	NO	NO	NO		NO
1479	49	F	34.16	34	2019-09-30 09:32:00	NO	2019-11-03 06:44:00	X	NO	NO	NO		NO	NO
1480	68	M	2.99	3	2019-11-06 06:34:00	NO	2019-11-03 03:05:00	X	NO	NO	NO	NO		NO
1481	76	F	0.1	0	2019-11-03 02:44:00	YES	2019-11-03 02:00:00	X	YES	NO	YES		YES	YES
1482	18	M	32.08	32	2019-12-05 07:53:00	NO	2019-11-03 01:46:00	X	YES	NO	NO	NO		NO
1483	49	F	0.2	0	2019-11-03 04:38:00	YES	2019-11-02 22:01:00	X	NO	NO	NO		NO	NO
1484	49	F	19.34	19	2019-11-22 08:13:00	YES	2019-11-02 19:05:00	X	NO	NO	NO		NO	NO
1485	94	M	0	0	2019-11-02 20:38:00	YES	2019-11-02 17:51:00	X	NO	NO	NO	NO		NO
1486	47	F	61.64	62	2020-01-03 11:14:00	YES	2019-11-02 16:43:00	X	NO	NO	NO		NO	NO
1487	62	M	0.07	0	2019-11-02 15:58:00	NO	2019-11-02 15:29:00	X	NO	NO	NO	NO		NO
1488	44	M	39.56	40	2019-12-12 08:15:00	NO	2019-11-02 13:55:00	X	NO	NO	NO	NO		NO
1489	54	M	87.96	88	2019-08-07 01:03:00	YES	2019-11-02 13:42:00	X	NO	NO	NO	NO		NO
1490	57	M	0.01	0	2019-11-02 16:48:00	YES	2019-11-02 13:12:00	X	NO	NO	NO	NO		NO
1491	87	F	45.75	46	2019-12-18 12:34:00	YES	2019-11-02 13:11:00	X	YES	NO	NO		NO	NO
1492	30	M	18.7	19	2019-11-21 10:13:00	NO	2019-11-02 12:32:00	X	NO	NO	NO	NO		NO
1493	31	F	43.68	44	2019-12-16 07:50:00	NO	2019-11-02 11:44:00	X	NO	NO	NO		NO	NO	NO	NO	NO		NO	NO
1494	77	M	0.01	0	2019-11-02 12:11:00	NO	2019-11-02 11:26:00	X	NO	NO	YES	NO		NO
1495	81	M	0.05	0	2019-11-03 00:23:00	YES	2019-11-02 10:56:00	X	NO	NO	NO	NO		NO
1496	76	M	11.9	12	2019-11-14 13:40:00	YES	2019-11-02 10:12:00	X	NO	NO	NO	NO		NO
1497	54	M	19.37	19	2019-11-21 14:56:00	NO	2019-11-02 04:18:00	X	NO	NO	NO	NO		NO
1498	71	F	0.1	0	2019-11-02 11:52:00	YES	2019-11-02 04:13:00	X	NO	NO	NO		NO	NO
1499	25	F	0.3	0	2019-11-02 06:35:00	NO	2019-11-02 04:11:00	X	NO	NO	NO		NO	NO
1500	32	F	1.71	2	2019-11-04 08:06:00	NO	2019-11-02 01:13:00	X	NO	NO	NO		NO	NO	NO	NO	NO		NO	NO
1501	75	M	0.22	0	2019-11-02 08:57:00	YES	2019-11-01 23:51:00	X	NO	NO	NO	NO		NO
1502	43	M	46.77	47	2019-09-16 08:51:00	YES	2019-11-01 21:25:00	X	NO	NO	NO	NO		NO
1503	64	F	33.61	34	2019-09-29 19:36:00	NO	2019-11-01 21:10:00	X	NO	NO	NO		NO	NO
1504	54	F	31.73	32	2019-10-01 07:11:00	NO	2019-11-01 17:39:00	X	NO	NO	NO		NO	NO
1505	53	F	23.37	23	2019-10-09 14:15:00	YES	2019-11-01 17:03:00	X	NO	NO	YES		YES	YES
1506	62	F	0.66	1	2019-11-01 21:06:00	NO	2019-11-01 16:44:00	X	NO	NO	NO		NO	NO	NO	NO	NO		NO	NO
1507	43	F	2.63	3	2019-11-04 10:05:00	YES	2019-11-01 16:17:00	X	NO	NO	NO		NO	NO
1508	57	M	0.11	0	2019-11-01 17:42:00	YES	2019-11-01 15:41:00	X	NO	NO	NO	NO		NO
1509	62	F	0.11	0	2019-11-02 16:12:00	NO	2019-11-01 15:35:00	X	NO	NO	NO		NO	NO
1510	48	M	2.2	2	2019-11-04 06:23:00	NO	2019-11-01 13:56:00	X	NO	NO	NO	NO		NO
1511	91	M	0.08	0	2019-11-01 18:20:00	YES	2019-11-01 12:48:00	X	NO	NO	NO	NO		NO
1512	42	M	19.65	20	2019-11-21 09:18:00	NO	2019-11-01 12:32:00	X	NO	NO	NO	NO		NO
1513	87	F	0.05	0	2019-11-01 16:58:00	NO	2019-11-01 12:03:00	X	NO	NO	NO		NO	NO
1514	68	M	81.4	81	2019-08-12 08:55:00	YES	2019-11-01 11:42:00	X	NO	NO	NO	NO		NO
1515	69	F	39.14	39	2019-09-23 14:30:00	NO	2019-11-01 11:38:00	X	NO	NO	YES		YES	YES
1516	68	M	0.06	0	2019-11-01 16:23:00	YES	2019-11-01 10:25:00	X	NO	NO	NO	NO		NO
1517	83	F	1.09	1	2019-11-03 15:31:00	YES	2019-11-01 10:25:00	X	NO	NO	YES		YES	YES
1518	66	M	58.56	59	2019-12-30 09:04:00	NO	2019-11-01 10:06:00	X	NO	NO	NO	NO		NO
1519	91	F	0.18	0	2019-11-01 10:57:00	YES	2019-11-01 09:36:00	X	NO	NO	NO		NO	NO
1520	40	F	5.62	6	2019-11-07 10:49:00	NO	2019-11-01 09:10:00	X	NO	NO	NO		NO	NO
1521	55	M	57.37	57	2019-12-29 00:11:00	NO	2019-11-01 08:59:00	X	NO	NO	NO	NO		NO	NO	NO	NO	YES		YES
1522	72	F	72.31	72	2019-08-21 09:18:00	NO	2019-11-01 08:45:00	X	NO	NO	NO		NO	NO
1523	58	M	30.81	31	2019-12-02 10:37:00	NO	2019-10-31 22:38:00	X	NO	NO	NO	NO		NO
1524	71	F	0.22	0	2019-11-01 08:27:00	YES	2019-10-31 17:32:00	X	NO	NO	NO		NO	NO
1525	75	M	73.7	74	2020-01-13 15:05:00	NO	2019-10-31 16:25:00	X	NO	NO	NO	NO		NO
1526	91	F	0.1	0	2019-10-31 15:26:00	YES	2019-10-31 15:26:00	X	NO	NO	NO		NO	NO
1527	47	F	64.61	65	2019-08-28 09:59:00	NO	2019-10-31 14:34:00	X	NO	NO	NO		NO	NO
1528	72	F	0.32	0	2019-10-31 16:51:00	YES	2019-10-31 14:25:00	X	NO	NO	NO		NO	NO
1529	80	F	9.91	10	2019-11-11 10:02:00	NO	2019-10-31 13:05:00	X	NO	NO	NO		NO	NO
1530	81	F	0.02	0	2019-10-31 12:49:00	NO	2019-10-31 13:00:00	X	NO	NO	NO		NO	NO
1531	60	M	0.28	0	2019-10-31 12:25:00	NO	2019-10-31 12:18:00	X	NO	NO	NO	NO		NO
1532	68	M	0.03	0	2019-10-31 16:05:00	NO	2019-10-31 12:11:00	X	NO	NO	NO	NO		NO
1533	18	F	0.96	1	2019-11-01 13:43:00	NO	2019-10-31 11:45:00	X	NO	NO	NO		NO	NO	YES	NO	NO		NO	NO
1534	60	F	38.31	38	2019-12-09 08:16:00	YES	2019-10-31 10:58:00	X	NO	NO	NO		NO	NO
1535	71	M	0.87	1	2019-11-01 11:29:00	NO	2019-10-31 10:52:00	X	NO	NO	NO	NO		NO
1536	40	M	0.27	0	2019-10-31 21:51:00	YES	2019-10-31 10:27:00	X	NO	NO	NO	NO		NO
1537	81	M	1.65	2	2019-11-02 06:01:00	YES	2019-10-31 10:20:00	X	NO	NO	NO	NO		NO
1538	59	F	0.04	0	2019-10-31 10:12:00	NO	2019-10-31 10:01:00	X	NO	NO	NO		NO	NO
1539	29	M	0.67	1	2019-11-01 17:05:00	NO	2019-10-31 04:24:00	X	NO	NO	NO	NO		NO
1540	67	F	0.85	1	2019-10-31 03:53:00	YES	2019-10-31 02:52:00	X	NO	NO	NO		NO	NO
1541	78	M	57.48	57	2019-09-03 17:55:00	NO	2019-10-31 02:02:00	X	YES	YES	YES	NO		NO
1542	44	M	0.03	0	2019-10-31 00:03:00	YES	2019-10-30 23:28:00	X	NO	NO	NO	NO		NO
1543	66	F	0.34	0	2019-10-31 03:23:00	NO	2019-10-30 22:55:00	X	NO	NO	NO		NO	NO
1544	60	M	30.74	31	2019-09-30 16:25:00	NO	2019-10-30 22:19:00	X	NO	NO	NO	NO		NO
1545	77	F	0.9	1	2019-11-01 09:22:00	YES	2019-10-30 22:06:00	X	NO	NO	NO		NO	NO	NO	NO	NO		NO	NO
1546	73	M	0.17	0	2019-10-31 13:53:00	YES	2019-10-30 22:04:00	X	NO	NO	NO	NO		NO
1547	77	M	0.51	1	2019-10-30 13:29:00	NO	2019-10-30 20:59:00	X	NO	NO	NO	NO		NO	NO	NO	NO	NO		NO
1548	65	F	11.4	11	2019-11-11 11:25:00	NO	2019-10-30 20:45:00	X	NO	NO	NO		NO	NO
1549	90	F	0.08	0	2019-10-30 20:20:00	NO	2019-10-30 18:54:00	X	NO	NO	NO		NO	NO
1550	66	M	0.55	1	2019-10-31 10:21:00	NO	2019-10-30 18:13:00	X	NO	NO	YES	NO		NO
1551	88	M	0.1	0	2019-10-30 21:53:00	NO	2019-10-30 18:07:00	X	NO	NO	NO	NO		NO
1552	51	M	0.13	0	2019-10-31 00:48:00	YES	2019-10-30 17:09:00	X	NO	NO	NO	NO		NO
1553	74	F	2.26	2	2019-11-02 06:11:00	NO	2019-10-30 17:07:00	X	NO	NO	NO		NO	NO
1554	92	F	0.56	1	2019-10-30 21:54:00	YES	2019-10-30 16:48:00	X	NO	NO	NO		NO	NO
1555	65	M	0.39	0	2019-10-31 10:24:00	NO	2019-10-30 16:36:00	X	NO	NO	NO	NO		NO
1556	65	F	50.8	51	2019-12-20 15:57:00	NO	2019-10-30 16:07:00	X	NO	NO	NO		NO	NO	NO	NO	NO		NO	NO
1557	65	M	5.76	6	2019-10-25 11:39:00	NO	2019-10-30 16:05:00	X	NO	NO	NO	NO		NO
1558	65	M	0.1	0	2019-10-30 17:00:00	NO	2019-10-30 15:31:00	X	NO	NO	NO	NO		NO
1559	85	F	71.66	72	2020-01-10 11:35:00	YES	2019-10-30 14:29:00	X	NO	NO	NO		NO	NO
1560	34	F	0.02	0	2019-10-30 23:54:00	NO	2019-10-30 13:25:00	X	NO	NO	NO		NO	NO
1561	47	F	1.15	1	2019-10-31 22:41:00	NO	2019-10-30 13:13:00	X	NO	NO	NO		NO	NO
1562	21	M	1.46	1	2019-10-30 14:29:00	NO	2019-10-30 12:41:00	X	YES	NO	NO	NO		NO
1563	21	F	32.56	33	2019-12-02 08:58:00	NO	2019-10-30 12:12:00	X	NO	NO	NO		NO	NO
1564	91	F	0.09	0	2019-10-30 17:26:00	NO	2019-10-30 12:05:00	X	NO	NO	NO		NO	NO
1565	62	M	18.06	18	2019-11-17 16:22:00	NO	2019-10-30 11:31:00	X	NO	NO	NO	NO		NO
1566	66	M	0.09	0	2019-10-30 17:47:00	YES	2019-10-30 11:08:00	X	NO	NO	NO	NO		NO
1567	60	F	18.14	18	2019-10-12 11:17:00	NO	2019-10-30 10:16:00	X	NO	NO	NO		NO	NO
1568	64	M	2.77	3	2019-11-02 12:56:00	YES	2019-10-30 09:36:00	X	NO	NO	NO	NO		NO
1569	75	F	0.02	0	2019-10-30 15:33:00	YES	2019-10-30 08:37:00	X	NO	NO	NO		NO	NO
1570	81	M	0.03	0	2019-10-30 15:47:00	NO	2019-10-30 07:34:00	X	NO	NO	NO	NO		NO
1571	52	M	0.03	0	2019-10-30 05:26:00	NO	2019-10-30 02:40:00	X	NO	NO	NO	NO		NO
1572	87	M	0.03	0	2019-10-30 02:38:00	YES	2019-10-30 01:46:00	X	NO	NO	NO	NO		NO
1573	63	M	0.74	1	2019-10-31 09:27:00	YES	2019-10-30 01:39:00	X	NO	NO	NO	NO		NO
1574	52	F	0.02	0	2019-10-30 10:09:00	NO	2019-10-30 01:14:00	X	NO	NO	NO		NO	NO	NO	NO	NO		NO	NO
1575	39	F	19.01	19	2019-11-18 02:50:00	NO	2019-10-29 23:27:00	X	NO	NO	NO		NO	NO
1576	70	M	0.34	0	2019-10-30 09:08:00	NO	2019-10-29 20:08:00	X	NO	NO	NO	NO		NO
1577	59	F	48.17	48	2019-12-17 09:33:00	YES	2019-10-29 19:43:00	X	NO	NO	NO		NO	NO
1578	24	M	42.09	42	2019-09-17 19:33:00	NO	2019-10-29 18:23:00	X	YES	NO	YES	YES		YES
1579	60	F	0.15	0	2019-10-29 23:54:00	NO	2019-10-29 17:38:00	X	NO	NO	NO		NO	NO
1580	74	F	36.11	36	2019-09-24 13:15:00	NO	2019-10-29 16:11:00	X	NO	NO	NO		NO	NO
1581	41	M	62.21	62	2019-12-31 04:23:00	NO	2019-10-29 15:48:00	X	NO	NO	NO	NO		NO	NO	NO	NO	NO		NO
1582	72	M	11.54	12	2019-10-19 03:15:00	NO	2019-10-29 13:58:00	X	NO	NO	NO	NO		NO
1583	33	M	0.02	0	2019-10-29 16:29:00	NO	2019-10-29 13:19:00	X	NO	NO	NO	NO		NO
1584	51	M	20.9	21	2019-10-09 05:05:00	YES	2019-10-29 11:47:00	X	NO	NO	NO	NO		NO
1585	89	M	26.64	27	2019-11-25 15:04:00	YES	2019-10-29 11:30:00	X	NO	NO	NO	NO		NO
1586	55	M	0.91	1	2019-10-30 12:00:00	NO	2019-10-29 10:54:00	X	NO	NO	NO	NO		NO
1587	58	M	0.08	0	2019-10-29 13:43:00	NO	2019-10-29 09:00:00	X	YES	NO	NO	YES		YES
1588	34	M	0.06	0	2019-10-29 14:59:00	NO	2019-10-29 08:45:00	X	NO	NO	NO	NO		NO
1589	67	M	4.47	4	2019-11-03 06:30:00	NO	2019-10-29 00:56:00	X	NO	NO	NO	NO		NO
1590	53	F	0.25	0	2019-10-29 03:37:00	NO	2019-10-28 22:28:00	X	NO	NO	NO		NO	NO
1591	37	M	44.15	44	2019-09-14 21:38:00	NO	2019-10-28 22:23:00	X	NO	NO	NO	NO		NO
1592	71	F	0.79	1	2019-10-28 22:40:00	YES	2019-10-28 21:17:00	X	NO	NO	YES		NO	NO
1593	49	M	0.02	0	2019-10-29 04:06:00	YES	2019-10-28 20:44:00	X	YES	NO	NO	NO		NO
1594	66	F	0.45	0	2019-10-29 07:48:00	NO	2019-10-28 19:55:00	X	NO	NO	NO		NO	NO	NO	NO	NO		NO	NO
1595	32	M	13.06	13	2019-10-15 21:45:00	NO	2019-10-28 19:47:00	X	NO	NO	NO	NO		NO
1596	79	M	29.63	30	2019-09-29 12:49:00	NO	2019-10-28 19:46:00	X	NO	NO	NO	NO		NO
1597	20	F	1.83	2	2019-10-31 12:17:00	YES	2019-10-28 18:11:00	X	NO	NO	NO		NO	NO
1598	65	M	76.54	77	2020-01-14 08:39:00	NO	2019-10-28 17:05:00	X	NO	NO	NO	NO		NO
1599	46	M	34.57	35	2019-12-02 08:48:00	NO	2019-10-28 15:03:00	X	NO	NO	NO	NO		NO
1600	61	M	0.05	0	2019-10-28 20:10:00	NO	2019-10-28 13:45:00	X	NO	NO	NO	NO		NO
1601	61	M	0.01	0	2019-10-28 16:58:00	NO	2019-10-28 13:14:00	X	YES	YES	YES	YES		YES	YES	YES	YES	YES		YES
1602	83	M	77.88	78	2020-01-14 14:49:00	YES	2019-10-28 13:05:00	X	NO	NO	NO	NO		NO
1603	83	M	0.01	0	2019-10-28 16:58:00	YES	2019-10-28 12:52:00	X	NO	NO	NO	NO		NO
1604	87	F	2.61	3	2019-10-31 09:23:00	YES	2019-10-28 12:31:00	X	NO	NO	NO		NO	NO
1605	69	F	1.77	2	2019-10-30 10:49:00	NO	2019-10-28 12:20:00	X	NO	NO	NO		NO	NO
1606	44	M	0.18	0	2019-10-28 17:20:00	YES	2019-10-28 11:57:00	X	NO	NO	NO	NO		NO	NO	NO	NO	NO		NO
1607	83	F	61.12	61	2019-08-28 10:28:00	NO	2019-10-28 09:27:00	X	NO	NO	NO		NO	NO
1608	30	F	60.95	61	2019-08-28 15:26:00	NO	2019-10-28 06:52:00	X	YES	YES	NO		YES	YES
1609	91	F	0.22	0	2019-10-28 17:21:00	YES	2019-10-28 04:31:00	X	NO	NO	NO		YES	YES
1610	48	M	0.13	0	2019-10-28 15:21:00	NO	2019-10-28 04:15:00	X	NO	NO	NO	NO		NO
1611	71	F	0.06	0	2019-10-28 03:17:00	YES	2019-10-28 03:17:00	X	NO	NO	NO		NO	NO
1612	61	F	0.06	0	2019-10-27 22:07:00	YES	2019-10-27 21:52:00	X	NO	NO	NO		NO	NO
1613	91	F	0.55	1	2019-10-28 08:52:00	YES	2019-10-27 17:45:00	X	NO	NO	NO		YES	YES	NO	NO	NO		YES	YES
1614	64	M	3.02	3	2019-10-30 20:44:00	NO	2019-10-27 17:07:00	X	NO	NO	NO	NO		NO
1615	63	F	1.05	1	2019-10-29 09:11:00	YES	2019-10-27 16:53:00	X	NO	NO	NO		NO	NO
1616	39	F	3.59	4	2019-10-31 12:13:00	NO	2019-10-27 16:44:00	X	NO	NO	NO		NO	NO
1617	28	F	5.33	5	2019-10-22 14:29:00	NO	2019-10-27 12:45:00	X	NO	NO	NO		NO	NO
1618	70	F	0.99	1	2019-10-28 15:44:00	NO	2019-10-27 11:51:00	X	NO	NO	NO		NO	NO
1619	83	M	31.3	31	2019-09-26 09:20:00	NO	2019-10-27 11:06:00	X	NO	NO	NO	NO		NO	NO	NO	NO	NO		NO
1620	64	F	27.9	28	2019-09-29 19:36:00	NO	2019-10-27 09:47:00	X	NO	NO	NO		NO	NO
1621	88	F	6.39	6	2019-10-21 06:12:00	NO	2019-10-27 09:37:00	X	NO	NO	NO		NO	NO
1622	73	F	39.32	39	2019-09-18 08:40:00	YES	2019-10-27 09:05:00	X	NO	NO	NO		NO	NO
1623	82	F	0.07	0	2019-10-27 12:50:00	NO	2019-10-27 06:49:00	X	NO	NO	NO		NO	NO
1624	33	M	0.06	0	2019-10-27 10:08:00	NO	2019-10-27 04:57:00	X	NO	NO	NO	NO		NO
1625	84	F	0.15	0	2019-10-26 22:28:00	NO	2019-10-26 22:40:00	X	NO	NO	NO		NO	NO
1626	66	M	0.74	1	2019-10-27 18:51:00	NO	2019-10-26 22:36:00	X	NO	NO	NO	NO		NO
1627	78	M	6.79	7	2019-10-20 08:20:00	NO	2019-10-26 21:53:00	X	NO	NO	NO	NO		NO
1628	68	F	5.68	6	2019-11-01 15:30:00	NO	2019-10-26 17:00:00	X	NO	NO	NO		NO	NO
1629	80	M	0.08	0	2019-10-26 17:05:00	YES	2019-10-26 16:29:00	X	NO	NO	NO	NO		NO
1630	87	F	0.02	0	2019-10-27 01:02:00	NO	2019-10-26 16:18:00	X	NO	NO	NO		NO	NO
1631	66	F	43.43	43	2019-09-13 13:22:00	NO	2019-10-26 16:09:00	X	NO	NO	NO		NO	NO
1632	75	F	0.18	0	2019-10-27 01:51:00	NO	2019-10-26 15:44:00	X	NO	NO	NO		NO	NO
1633	76	M	41.1	41	2019-09-15 09:58:00	NO	2019-10-26 10:40:00	X	NO	NO	NO	NO		NO
1634	73	M	0.04	0	2019-10-26 12:30:00	NO	2019-10-26 10:21:00	X	NO	NO	NO	NO		NO
1635	84	F	0.04	0	2019-10-26 17:26:00	NO	2019-10-26 09:47:00	X	YES	NO	NO		YES	YES
1636	40	F	3.02	3	2019-10-29 12:50:00	NO	2019-10-26 05:22:00	X	NO	NO	NO		NO	NO
1637	66	F	0.03	0	2019-10-26 05:03:00	NO	2019-10-26 04:27:00	X	NO	NO	NO		NO	NO	NO	NO	NO		NO	NO
1638	64	F	0.31	0	2019-10-26 13:33:00	NO	2019-10-26 01:44:00	X	NO	NO	NO		NO	NO
1639	74	F	0.01	0	2019-10-26 04:12:00	NO	2019-10-25 23:10:00	X	NO	NO	NO		NO	NO	NO	NO	NO		NO	NO
1640	23	M	0.68	1	2019-10-26 14:17:00	NO	2019-10-25 21:58:00	X	YES	NO	NO	NO		NO
1641	66	F	0.35	0	2019-10-26 08:07:00	NO	2019-10-25 20:24:00	X	NO	NO	NO		YES	YES
1642	63	M	38.69	39	2019-09-17 06:50:00	NO	2019-10-25 20:14:00	X	NO	NO	NO	NO		NO
1643	54	F	81.46	81	2019-08-05 14:45:00	NO	2019-10-25 18:43:00	X	NO	NO	NO		NO	NO
1644	53	M	8.73	9	2019-10-17 10:28:00	YES	2019-10-25 16:49:00	X	NO	NO	NO	NO		NO
1645	77	F	28.65	29	2019-11-23 12:30:00	NO	2019-10-25 16:34:00	X	NO	NO	NO		NO	NO
1646	36	F	29.63	30	2019-11-24 11:58:00	NO	2019-10-25 16:24:00	X	NO	NO	NO		NO	NO
1647	67	M	0.04	0	2019-10-25 20:32:00	YES	2019-10-25 15:48:00	X	NO	NO	YES	NO		NO	NO	NO	YES	NO		NO
1648	36	M	1.16	1	2019-10-27 10:15:00	YES	2019-10-25 14:54:00	X	NO	NO	NO	NO		NO
1649	67	M	21.82	22	2019-10-04 02:30:00	NO	2019-10-25 14:54:00	X	NO	NO	NO	NO		NO
1650	60	M	8.18	8	2019-10-18 11:07:00	NO	2019-10-25 13:05:00	X	NO	NO	NO	NO		NO
1651	58	F	1.07	1	2019-10-26 18:15:00	NO	2019-10-25 12:09:00	X	NO	NO	NO		NO	NO
1652	55	M	0.09	0	2019-10-25 18:04:00	NO	2019-10-25 11:54:00	X	NO	NO	NO	NO		NO
1653	53	M	4.54	5	2019-10-21 14:42:00	NO	2019-10-25 11:37:00	X	NO	NO	NO	NO		NO
1654	63	M	0.05	0	2019-10-25 13:12:00	NO	2019-10-25 11:26:00	X	NO	NO	NO	NO		NO
1655	75	F	77.46	77	2019-08-09 08:49:00	NO	2019-10-25 11:01:00	X	NO	NO	NO		NO	NO
1656	65	F	0.1	0	2019-10-25 17:40:00	NO	2019-10-25 10:57:00	X	NO	NO	NO		NO	NO	NO	NO	NO		NO	NO
1657	74	M	0.37	0	2019-10-25 13:33:00	YES	2019-10-25 10:18:00	X	NO	NO	NO	NO		NO
1658	49	M	16	16	2019-10-09 13:49:00	YES	2019-10-25 09:38:00	X	NO	NO	NO	NO		NO
1659	63	M	0.04	0	2019-10-25 12:46:00	NO	2019-10-25 06:01:00	X	NO	NO	NO	NO		NO
1660	21	F	78.88	79	2019-08-07 12:26:00	NO	2019-10-25 05:00:00	X	NO	NO	NO		NO	NO
1661	48	F	0.16	0	2019-10-25 09:34:00	NO	2019-10-25 04:32:00	X	NO	NO	NO		YES	YES
1662	32	M	0.02	0	2019-10-25 11:44:00	NO	2019-10-25 02:13:00	X	NO	NO	NO	NO		NO
1663	54	M	14.1	14	2019-10-11 11:42:00	YES	2019-10-25 00:32:00	X	NO	NO	NO	YES		YES
1664	40	M	2.02	2	2019-10-27 15:50:00	NO	2019-10-24 22:10:00	X	NO	NO	NO	NO		NO
1665	67	M	0.94	1	2019-10-26 13:49:00	YES	2019-10-24 20:33:00	X	NO	NO	NO	NO		NO
1666	58	M	1.84	2	2019-10-27 10:13:00	NO	2019-10-24 19:21:00	X	NO	NO	NO	NO		NO
1667	69	F	8.79	9	2019-10-16 12:35:00	NO	2019-10-24 18:49:00	X	NO	NO	NO		NO	NO
1668	58	F	0.88	1	2019-10-24 18:59:00	NO	2019-10-24 18:30:00	X	NO	NO	NO		NO	NO
1669	48	F	68.63	69	2020-01-01 10:57:00	YES	2019-10-24 18:13:00	X	NO	NO	NO		NO	NO
1670	63	M	0.43	0	2019-10-25 08:00:00	YES	2019-10-24 18:05:00	X	NO	NO	NO	NO		NO
1671	43	F	0.4	0	2019-10-25 11:12:00	NO	2019-10-24 18:01:00	X	NO	NO	NO		NO	NO
1672	61	F	26.23	26	2019-09-28 23:37:00	NO	2019-10-24 17:28:00	X	NO	NO	NO		NO	NO
1673	79	M	0.73	1	2019-10-24 22:18:00	YES	2019-10-24 16:52:00	X	NO	NO	NO	NO		NO
1674	77	F	3.12	3	2019-10-28 15:03:00	YES	2019-10-24 16:38:00	X	NO	NO	NO		NO	NO
1675	75	F	0.78	1	2019-10-24 20:04:00	NO	2019-10-24 16:23:00	X	YES	NO	NO		YES	YES
1676	35	F	0.54	1	2019-10-25 03:42:00	NO	2019-10-24 16:23:00	X	NO	NO	NO		NO	NO	NO	NO	NO		NO	NO
1677	64	M	46.21	46	2019-09-09 13:08:00	NO	2019-10-24 15:50:00	X	NO	NO	NO	NO		NO
1678	57	M	0.13	0	2019-10-24 17:10:00	YES	2019-10-24 15:44:00	X	NO	NO	NO	NO		NO	NO	NO	NO	NO		NO
1679	32	M	41.47	41	2019-12-05 11:00:00	NO	2019-10-24 14:06:00	X	NO	NO	NO	NO		NO
1680	56	M	0.68	1	2019-10-24 19:31:00	YES	2019-10-24 13:02:00	X	NO	NO	NO	NO		NO
1681	89	F	0.01	0	2019-10-24 15:48:00	YES	2019-10-24 12:54:00	X	NO	NO	NO		NO	NO
1682	78	M	0.12	0	2019-10-24 13:05:00	NO	2019-10-24 12:51:00	X	NO	NO	NO	NO		NO
1683	77	M	0.02	0	2019-10-24 12:23:00	YES	2019-10-24 11:46:00	X	NO	NO	NO	NO		NO
1684	70	M	42.23	42	2019-09-12 09:31:00	NO	2019-10-24 11:33:00	X	YES	NO	NO	NO		NO
1685	73	M	40.78	41	2019-12-05 09:23:00	NO	2019-10-24 11:27:00	X	NO	NO	NO	NO		NO
1686	33	M	2.42	2	2019-10-22 23:11:00	NO	2019-10-24 11:27:00	X	NO	NO	YES	NO		NO
1687	86	M	0.53	1	2019-10-25 05:47:00	YES	2019-10-24 11:15:00	X	NO	NO	NO	NO		NO
1688	88	M	0.01	0	2019-10-24 17:35:00	YES	2019-10-24 11:06:00	X	NO	NO	NO	NO		NO
1689	83	M	0.68	1	2019-10-25 08:15:00	NO	2019-10-24 10:10:00	X	NO	NO	NO	NO		NO
1690	74	M	3.92	4	2019-10-28 11:07:00	NO	2019-10-24 09:09:00	X	NO	NO	NO	NO		NO
1691	21	F	77.97	78	2019-08-07 12:26:00	NO	2019-10-24 04:50:00	X	NO	NO	NO		NO	NO
1692	67	F	54.97	55	2019-08-30 07:08:00	NO	2019-10-24 04:32:00	X	NO	NO	NO		NO	NO
1693	58	F	0.05	0	2019-10-24 13:37:00	NO	2019-10-24 00:56:00	X	NO	NO	NO		NO	NO	NO	NO	NO		NO	NO
1694	76	F	2.17	2	2019-10-22 11:30:00	NO	2019-10-24 00:54:00	X	NO	NO	NO		NO	NO
1695	37	M	39.22	39	2019-09-14 21:38:00	NO	2019-10-23 23:58:00	X	NO	NO	NO	NO		NO
1696	24	F	0.34	0	2019-10-24 14:24:00	NO	2019-10-23 23:33:00	X	NO	NO	NO		NO	NO	NO	NO	NO		NO	NO
1697	76	M	0.59	1	2019-10-24 04:08:00	NO	2019-10-23 21:35:00	X	NO	NO	NO	NO		NO	NO	NO	NO	NO		NO
1698	22	M	68.45	68	2019-08-16 11:57:00	NO	2019-10-23 20:55:00	X	YES	YES	NO	NO		NO
1699	76	F	2.13	2	2019-10-22 11:57:00	NO	2019-10-23 20:04:00	X	NO	NO	NO		NO	NO
1700	83	F	0.48	0	2019-10-24 06:02:00	YES	2019-10-23 19:21:00	X	NO	NO	NO		NO	NO
1701	72	M	10.23	10	2019-10-14 10:59:00	NO	2019-10-23 18:33:00	X	NO	NO	NO	NO		NO
1702	74	M	29.53	30	2019-11-22 14:58:00	YES	2019-10-23 18:11:00	X	NO	NO	NO	NO		NO
1703	78	M	0.3	0	2019-10-24 08:15:00	NO	2019-10-23 17:03:00	X	NO	NO	NO	NO		NO
1704	58	M	0.08	0	2019-10-23 23:20:00	NO	2019-10-23 16:26:00	X	NO	NO	NO	NO		NO
1705	34	F	1.18	1	2019-10-24 20:43:00	NO	2019-10-23 16:04:00	X	NO	NO	NO		NO	NO
1706	83	M	0.46	0	2019-10-24 03:15:00	NO	2019-10-23 15:44:00	X	NO	NO	NO	NO		NO
1707	69	M	0.21	0	2019-10-23 17:33:00	NO	2019-10-23 15:44:00	X	YES	NO	NO	NO		NO	YES	NO	NO	NO		NO
1708	36	F	36.11	36	2019-09-18 07:48:00	NO	2019-10-23 15:21:00	X	NO	NO	NO		NO	NO
1709	73	F	26.16	26	2019-09-28 01:52:00	NO	2019-10-23 14:54:00	X	NO	NO	NO		NO	NO
1710	69	F	7.59	8	2019-10-31 12:57:00	NO	2019-10-23 14:14:00	X	NO	NO	NO		NO	NO
1711	79	F	0.15	0	2019-10-23 17:59:00	NO	2019-10-23 13:50:00	X	NO	NO	NO		NO	NO
1712	25	F	24.54	25	2019-09-29 07:12:00	NO	2019-10-23 13:12:00	X	NO	NO	NO		NO	NO
1713	78	F	37.64	38	2019-11-30 06:41:00	NO	2019-10-23 13:06:00	X	NO	NO	NO		NO	NO	NO	NO	NO		NO	NO
1714	80	M	0.31	0	2019-10-24 04:32:00	YES	2019-10-23 13:02:00	X	NO	NO	NO	NO		NO
1715	84	M	11.78	12	2019-10-12 01:25:00	YES	2019-10-23 12:54:00	X	NO	NO	NO	NO		NO
1716	84	M	10.59	11	2019-10-13 19:28:00	NO	2019-10-23 12:54:00	X	NO	NO	NO	NO		NO
1717	57	F	20.81	21	2019-10-03 00:53:00	NO	2019-10-23 12:30:00	X	NO	NO	NO		NO	NO	NO	NO	NO		NO	NO
1718	79	M	0.21	0	2019-10-23 13:00:00	YES	2019-10-23 11:55:00	X	NO	NO	NO	NO		NO
1719	53	F	12.73	13	2019-11-05 10:44:00	NO	2019-10-23 11:32:00	X	NO	NO	NO		NO	NO
1720	51	M	15.88	16	2019-11-08 11:48:00	NO	2019-10-23 11:08:00	X	NO	NO	NO	NO		NO
1721	42	F	0.04	0	2019-10-23 17:42:00	YES	2019-10-23 10:07:00	X	NO	NO	NO		NO	NO	NO	NO	NO		NO	NO
1722	84	M	0.49	0	2019-10-24 08:48:00	NO	2019-10-23 09:53:00	X	NO	NO	NO	NO		NO	NO	NO	NO	NO		NO
1723	55	M	0.02	0	2019-10-23 19:05:00	YES	2019-10-23 09:44:00	X	NO	NO	NO	NO		NO
1724	79	M	0.46	0	2019-10-24 02:44:00	NO	2019-10-23 07:54:00	X	YES	NO	NO	NO		NO
1725	74	F	43.7	44	2019-12-06 09:20:00	NO	2019-10-23 01:15:00	X	NO	NO	NO		NO	NO
1726	77	M	0.02	0	2019-10-23 01:57:00	YES	2019-10-23 01:00:00	X	NO	NO	NO	NO		NO
1727	57	M	1.28	1	2019-10-23 04:33:00	YES	2019-10-23 00:24:00	X	NO	NO	NO	NO		NO
1728	62	M	23.84	24	2019-11-17 09:05:00	YES	2019-10-22 22:55:00	X	NO	NO	NO	NO		NO
1729	21	F	68.73	69	2019-08-15 11:21:00	NO	2019-10-22 22:41:00	X	NO	NO	NO		NO	NO
1730	61	F	0.8	1	2019-10-23 00:11:00	NO	2019-10-22 20:30:00	X	NO	NO	NO		NO	NO
1731	21	F	76.76	77	2019-08-07 12:26:00	NO	2019-10-22 20:14:00	X	NO	NO	NO		NO	NO
1732	57	M	26.03	26	2019-09-27 12:57:00	YES	2019-10-22 19:52:00	X	NO	NO	NO	NO		NO
1733	80	F	18.76	19	2019-11-11 08:56:00	YES	2019-10-22 19:14:00	X	NO	NO	NO		NO	NO
1734	34	M	5.65	6	2019-10-29 14:59:00	NO	2019-10-22 18:13:00	X	NO	NO	NO	NO		NO
1735	63	M	89.06	89	2019-07-26 10:10:00	YES	2019-10-22 17:41:00	X	YES	NO	NO	NO		NO
1736	66	F	35.48	35	2019-11-27 09:12:00	NO	2019-10-22 16:53:00	X	NO	NO	NO		NO	NO
1737	54	M	0.39	0	2019-10-23 09:45:00	NO	2019-10-22 16:43:00	X	NO	NO	NO	NO		NO
1738	18	F	49.6	50	2019-12-11 13:49:00	NO	2019-10-22 15:11:00	X	NO	NO	NO		NO	NO
1739	50	M	0.9	1	2019-10-22 20:15:00	YES	2019-10-22 14:30:00	X	NO	NO	NO	NO		NO
1740	76	M	0.02	0	2019-10-22 20:41:00	YES	2019-10-22 14:08:00	X	NO	NO	NO	NO		NO
1741	65	M	1.91	2	2019-10-25 11:39:00	NO	2019-10-22 13:55:00	X	YES	YES	NO	NO		NO
1742	81	F	19.31	19	2019-10-03 13:06:00	YES	2019-10-22 13:31:00	X	NO	NO	NO		NO	NO
1743	94	M	0.2	0	2019-10-22 15:31:00	YES	2019-10-22 13:16:00	X	NO	NO	NO	NO		NO
1744	64	M	0.6	1	2019-10-23 11:24:00	YES	2019-10-22 12:49:00	X	NO	NO	NO	NO		NO
1745	62	M	25.95	26	2019-11-17 16:22:00	NO	2019-10-22 12:39:00	X	NO	NO	NO	NO		NO
1746	33	M	0.04	0	2019-10-22 23:11:00	NO	2019-10-22 12:36:00	X	NO	NO	YES	NO		NO
1747	60	M	0.12	0	2019-10-22 18:09:00	NO	2019-10-22 12:12:00	X	NO	NO	NO	NO		NO
1748	38	F	27.7	28	2019-11-19 16:10:00	NO	2019-10-22 11:58:00	X	NO	NO	NO		NO	NO
1749	24	M	2.11	2	2019-10-24 17:39:00	NO	2019-10-22 11:44:00	X	YES	NO	NO	NO		NO
1750	68	M	0.04	0	2019-10-22 17:20:00	YES	2019-10-22 10:44:00	X	NO	NO	NO	NO		NO
1751	72	F	3.84	4	2019-10-18 17:30:00	YES	2019-10-22 10:26:00	X	NO	NO	NO		NO	NO
1752	91	M	0.33	0	2019-10-22 10:56:00	YES	2019-10-22 09:53:00	X	NO	NO	NO	NO		NO
1753	29	F	18.3	18	2019-11-09 23:16:00	NO	2019-10-22 09:40:00	X	NO	NO	NO		NO	NO
1754	28	F	35.98	36	2019-11-27 09:34:00	NO	2019-10-22 09:31:00	X	NO	NO	NO		NO	NO
1755	19	M	0.12	0	2019-10-22 11:47:00	NO	2019-10-22 09:22:00	X	NO	NO	NO	NO		NO
1756	66	M	0.04	0	2019-10-22 19:11:00	NO	2019-10-22 09:12:00	X	NO	NO	NO	NO		NO
1757	47	M	1.25	1	2019-10-23 15:00:00	NO	2019-10-22 05:02:00	X	NO	NO	NO	NO		NO
1758	70	M	0.09	0	2019-10-22 13:04:00	YES	2019-10-22 03:08:00	X	NO	NO	NO	NO		NO
1759	69	F	0.74	1	2019-10-21 23:17:00	YES	2019-10-21 23:16:00	X	NO	NO	NO		YES	YES	NO	NO	NO		YES	YES
1760	43	F	0.21	0	2019-10-22 08:46:00	NO	2019-10-21 22:12:00	X	NO	NO	NO		NO	NO
1761	72	M	0.29	0	2019-10-22 10:42:00	NO	2019-10-21 22:06:00	X	NO	NO	NO	NO		NO
1762	70	F	24.59	25	2019-09-27 13:59:00	NO	2019-10-21 21:31:00	X	NO	NO	NO		NO	NO	NO	NO	NO		NO	NO
1763	64	M	24.55	25	2019-11-15 17:16:00	NO	2019-10-21 19:27:00	X	NO	NO	NO	NO		NO
1764	55	F	0.32	0	2019-10-21 20:31:00	NO	2019-10-21 19:02:00	X	NO	NO	NO		NO	NO
1765	75	F	1.44	1	2019-10-23 14:06:00	NO	2019-10-21 18:43:00	X	NO	NO	NO		NO	NO
1766	48	M	1.86	2	2019-10-23 16:28:00	NO	2019-10-21 18:20:00	X	NO	NO	NO	NO		NO
1767	65	F	63.35	63	2019-12-25 07:53:00	NO	2019-10-21 16:57:00	X	NO	NO	NO		NO	NO
1768	39	M	3.06	3	2019-10-26 07:37:00	YES	2019-10-21 16:46:00	X	NO	NO	NO	NO		NO
1769	78	M	48.19	48	2019-09-03 17:55:00	NO	2019-10-21 16:44:00	X	YES	NO	NO	YES		YES
1770	80	M	0.31	0	2019-10-21 14:50:00	NO	2019-10-21 14:50:00	X	NO	NO	NO	NO		NO	NO	NO	NO	NO		NO
1771	54	M	52.47	52	2019-08-30 10:51:00	NO	2019-10-21 14:40:00	X	NO	NO	NO	NO		NO
1772	55	M	0.5	1	2019-10-22 10:29:00	NO	2019-10-21 14:21:00	X	NO	NO	NO	NO		NO
1773	74	M	0.11	0	2019-10-22 12:24:00	NO	2019-10-21 13:49:00	X	NO	NO	NO	NO		NO
1774	53	F	21.17	21	2019-09-30 18:57:00	NO	2019-10-21 13:13:00	X	NO	NO	NO		NO	NO
1775	73	M	4.51	5	2019-10-26 06:37:00	NO	2019-10-21 13:03:00	X	NO	NO	NO	NO		NO	NO	NO	NO	NO		NO
1776	22	F	72.31	72	2020-01-02 11:49:00	NO	2019-10-21 12:42:00	X	NO	NO	NO		NO	NO
1777	65	F	56.9	57	2019-12-17 16:00:00	YES	2019-10-21 12:09:00	X	NO	NO	NO		NO	NO
1778	53	M	0.1	0	2019-10-21 14:42:00	NO	2019-10-21 11:56:00	X	NO	NO	NO	NO		NO	NO	NO	NO	NO		NO
1779	62	F	0.08	0	2019-10-21 19:32:00	NO	2019-10-21 10:54:00	X	NO	NO	NO		NO	NO
1780	62	F	0.51	1	2019-10-22 08:53:00	NO	2019-10-21 10:52:00	X	NO	NO	NO		NO	NO
1781	69	F	7.13	7	2019-10-14 12:23:00	NO	2019-10-21 10:46:00	X	NO	NO	NO		NO	NO
1782	85	M	0.66	1	2019-10-22 06:50:00	NO	2019-10-21 09:42:00	X	NO	NO	NO	NO		NO	NO	NO	NO	NO		NO
1783	55	M	0.04	0	2019-10-21 14:49:00	YES	2019-10-21 08:52:00	X	NO	NO	NO	NO		NO
1784	49	F	13.27	13	2019-10-09 12:52:00	YES	2019-10-21 08:51:00	X	NO	NO	NO		NO	NO
1785	47	F	9.53	10	2019-10-31 08:12:00	YES	2019-10-21 06:48:00	X	YES	YES	YES		YES	YES
1786	88	F	9.96	10	2019-10-11 07:47:00	YES	2019-10-21 04:51:00	X	YES	NO	NO		NO	NO
1787	39	M	1	1	2019-10-22 09:47:00	NO	2019-10-20 22:26:00	X	NO	NO	NO	NO		NO	NO	NO	NO	NO		NO
1788	54	F	18.29	18	2019-10-03 11:16:00	NO	2019-10-20 21:29:00	X	YES	NO	NO		NO	NO
1789	21	F	74.74	75	2019-08-07 12:26:00	NO	2019-10-20 19:46:00	X	NO	NO	NO		NO	NO
1790	70	F	44.38	44	2019-12-04 10:24:00	NO	2019-10-20 19:12:00	X	NO	NO	NO		NO	NO
1791	30	F	88.61	89	2019-07-24 10:29:00	NO	2019-10-20 19:12:00	X	NO	NO	NO		NO	NO
1792	53	F	0.43	0	2019-10-21 10:04:00	NO	2019-10-20 18:05:00	X	NO	NO	NO		NO	NO
1793	77	M	0.7	1	2019-10-22 10:37:00	NO	2019-10-20 18:00:00	X	NO	NO	NO	NO		NO
1794	70	F	50.18	50	2019-08-31 22:17:00	NO	2019-10-20 14:37:00	X	NO	NO	NO		YES	YES
1795	67	M	13.49	13	2019-11-03 06:30:00	NO	2019-10-20 12:09:00	X	NO	NO	NO	NO		NO	NO	NO	NO	NO		NO
1796	67	M	0.76	1	2019-10-21 11:43:00	YES	2019-10-20 11:58:00	X	NO	NO	NO	NO		NO	NO	NO	NO	NO		NO
1797	44	F	0.45	0	2019-10-20 09:56:00	NO	2019-10-20 10:13:00	X	NO	NO	NO		NO	NO
1798	77	M	12.62	13	2019-11-02 12:11:00	NO	2019-10-20 09:54:00	X	NO	NO	YES	NO		NO
1799	67	F	53.3	53	2019-08-28 02:11:00	YES	2019-10-20 06:31:00	X	NO	NO	NO		NO	NO
1800	75	F	24.31	24	2019-09-26 09:24:00	NO	2019-10-20 05:32:00	X	NO	NO	NO		NO	NO
1801	88	F	80.98	81	2019-07-31 07:09:00	NO	2019-10-20 04:27:00	X	NO	NO	NO		NO	NO
1802	88	F	0.5	1	2019-10-20 03:06:00	NO	2019-10-20 03:06:00	X	NO	NO	NO		NO	NO	NO	NO	NO		YES	YES
1803	41	M	71.62	72	2019-12-31 04:23:00	NO	2019-10-19 22:31:00	X	NO	NO	NO	NO		NO
1804	89	F	0.6	1	2019-10-20 01:41:00	NO	2019-10-19 22:06:00	X	YES	NO	NO		NO	NO
1805	62	M	0.6	1	2019-10-20 14:41:00	YES	2019-10-19 21:43:00	X	NO	NO	NO	NO		NO
1806	43	M	12.94	13	2019-11-02 00:55:00	YES	2019-10-19 21:01:00	X	NO	NO	NO	NO		NO
1807	55	M	0.77	1	2019-10-21 07:41:00	YES	2019-10-19 20:56:00	X	NO	NO	NO	NO		NO
1808	54	M	73.96	74	2019-08-07 01:03:00	YES	2019-10-19 20:41:00	X	NO	NO	NO	NO		NO
1809	60	M	25.29	25	2019-09-24 17:59:00	NO	2019-10-19 18:34:00	X	NO	NO	NO	NO		NO
1810	34	M	35.22	35	2019-09-14 15:39:00	YES	2019-10-19 17:31:00	X	NO	NO	NO	NO		NO
1811	69	F	0.58	1	2019-10-20 10:34:00	NO	2019-10-19 16:42:00	X	NO	NO	NO		NO	NO
1812	70	F	0.82	1	2019-10-19 23:25:00	YES	2019-10-19 16:08:00	X	NO	NO	NO		NO	NO
1813	68	F	8.74	9	2019-10-28 14:21:00	NO	2019-10-19 15:46:00	X	NO	NO	NO		NO	NO
1814	67	F	0.05	0	2019-10-19 16:10:00	NO	2019-10-19 15:37:00	X	NO	NO	NO		NO	NO
1815	62	M	9.02	9	2019-10-11 04:23:00	YES	2019-10-19 15:00:00	X	NO	NO	NO	NO		NO
1816	59	M	0	0	2019-10-19 14:32:00	NO	2019-10-19 11:52:00	X	NO	NO	NO	NO		NO
1817	59	M	59.1	59	2019-12-18 01:52:00	YES	2019-10-19 11:51:00	X	NO	NO	NO	NO		NO
1818	88	F	1.29	1	2019-10-21 06:12:00	NO	2019-10-19 09:59:00	X	NO	NO	NO		NO	NO	NO	NO	NO		NO	NO
1819	63	M	32.34	32	2019-09-17 06:50:00	NO	2019-10-19 08:46:00	X	NO	NO	YES	NO		NO	NO	NO	YES	NO		NO
1820	50	F	41.58	42	2019-11-30 04:05:00	NO	2019-10-19 06:49:00	X	NO	NO	NO		NO	NO	NO	NO	NO		NO	NO
1821	72	M	0.41	0	2019-10-19 03:15:00	NO	2019-10-19 03:53:00	X	NO	NO	NO	NO		NO
1822	75	F	0.1	0	2019-10-19 00:08:00	YES	2019-10-18 23:51:00	X	NO	NO	NO		NO	NO
1823	57	F	0.04	0	2019-10-19 08:35:00	NO	2019-10-18 22:52:00	X	NO	NO	NO		NO	NO
1824	78	F	20.48	20	2019-11-08 12:21:00	YES	2019-10-18 22:37:00	X	NO	NO	YES		NO	NO
1825	70	F	0.44	0	2019-10-19 13:31:00	YES	2019-10-18 22:02:00	X	NO	NO	NO		NO	NO
1826	25	F	44.13	44	2019-09-05 08:22:00	NO	2019-10-18 21:01:00	X	NO	NO	NO		NO	NO
1827	69	M	0.01	0	2019-10-18 20:58:00	NO	2019-10-18 20:48:00	X	NO	NO	NO	NO		NO
1828	19	F	0.14	0	2019-10-19 07:27:00	NO	2019-10-18 20:36:00	X	NO	NO	NO		NO	NO
1829	74	F	0.53	1	2019-10-19 12:11:00	NO	2019-10-18 20:18:00	X	NO	NO	NO		NO	NO
1830	80	F	0.66	1	2019-10-18 21:00:00	NO	2019-10-18 19:42:00	X	NO	NO	NO		NO	NO
1831	63	M	0.05	0	2019-10-19 12:27:00	NO	2019-10-18 19:27:00	X	NO	NO	NO	NO		NO	NO	NO	NO	NO		NO
1832	71	M	3.2	3	2019-10-16 12:56:00	YES	2019-10-18 18:27:00	X	NO	NO	NO	NO		NO
1833	75	M	32.53	33	2019-09-16 14:47:00	YES	2019-10-18 17:54:00	X	NO	NO	NO	NO		NO	NO	NO	NO	NO		NO
1834	61	M	0.88	1	2019-10-20 15:24:00	YES	2019-10-18 17:33:00	X	YES	NO	NO	NO		NO
1835	86	F	0.06	0	2019-10-19 05:24:00	YES	2019-10-18 16:40:00	X	NO	NO	NO		NO	NO	NO	NO	NO		NO	NO
1836	99	F	46.79	47	2019-09-02 00:49:00	NO	2019-10-18 15:41:00	X	NO	NO	YES		YES	YES
1837	76	M	0.23	0	2019-10-19 08:49:00	NO	2019-10-18 15:19:00	X	NO	NO	NO	NO		NO	NO	NO	NO	NO		NO
1838	64	M	3.72	4	2019-10-22 10:54:00	NO	2019-10-18 14:40:00	X	YES	NO	NO	YES		YES
1839	64	M	25.24	25	2019-11-13 08:56:00	NO	2019-10-18 13:22:00	X	NO	NO	NO	NO		NO
1840	72	F	0.24	0	2019-10-18 17:30:00	YES	2019-10-18 11:57:00	X	NO	NO	NO		NO	NO
1841	48	F	19.53	20	2019-09-29 10:46:00	YES	2019-10-18 11:39:00	X	NO	NO	NO		NO	NO
1842	72	F	22.37	22	2019-09-26 08:57:00	NO	2019-10-18 11:34:00	X	NO	NO	YES		YES	YES
1843	59	F	58.39	58	2019-08-21 10:26:00	NO	2019-10-18 11:25:00	X	NO	NO	NO		NO	NO
1844	54	M	52.57	53	2019-08-27 00:31:00	NO	2019-10-18 10:35:00	X	NO	NO	NO	NO		NO
1845	64	F	2.86	3	2019-10-21 16:33:00	YES	2019-10-18 10:26:00	X	YES	NO	NO		NO	NO
1846	62	M	0.85	1	2019-10-19 12:11:00	NO	2019-10-18 10:03:00	X	NO	NO	NO	NO		NO
1847	88	F	51.34	51	2019-08-28 11:16:00	NO	2019-10-18 09:56:00	X	NO	NO	NO		NO	NO
1848	68	F	39.77	40	2019-11-27 08:11:00	YES	2019-10-18 09:23:00	X	NO	NO	YES		YES	YES
1849	83	F	0.51	1	2019-10-18 11:08:00	NO	2019-10-18 07:42:00	X	NO	NO	YES		NO	NO
1850	69	M	0.1	0	2019-10-18 13:20:00	NO	2019-10-18 07:13:00	X	NO	NO	NO	NO		NO
1851	47	M	0.01	0	2019-10-18 08:08:00	NO	2019-10-18 03:34:00	X	NO	NO	NO	NO		NO
1852	66	F	0.84	1	2019-10-19 09:52:00	NO	2019-10-17 23:59:00	X	NO	NO	NO		NO	NO
1853	75	M	0.54	1	2019-10-18 13:54:00	NO	2019-10-17 22:24:00	X	NO	NO	NO	NO		NO
1854	38	M	63.73	64	2019-08-15 12:45:00	NO	2019-10-17 20:04:00	X	YES	NO	NO	NO		NO
1855	35	F	0.02	0	2019-10-18 02:41:00	YES	2019-10-17 19:20:00	X	NO	NO	NO		NO	NO
1856	56	F	3.25	3	2019-10-21 10:09:00	YES	2019-10-17 18:03:00	X	NO	NO	NO		NO	NO	NO	NO	NO		NO	NO
1857	55	F	0.51	1	2019-10-18 14:08:00	YES	2019-10-17 17:54:00	X	NO	NO	NO		NO	NO
1858	67	F	1.87	2	2019-10-19 15:46:00	YES	2019-10-17 16:58:00	X	NO	NO	NO		NO	NO
1859	56	M	18.65	19	2019-09-29 01:29:00	NO	2019-10-17 15:59:00	X	NO	NO	NO	NO		NO
1860	63	F	6.32	6	2019-10-11 23:11:00	NO	2019-10-17 15:45:00	X	NO	NO	NO		NO	NO
1861	80	M	0.45	0	2019-10-18 09:30:00	YES	2019-10-17 15:42:00	X	NO	NO	NO	NO		NO
1862	66	M	0.03	0	2019-10-17 19:59:00	YES	2019-10-17 14:59:00	X	NO	NO	NO	NO		NO
1863	39	M	1.48	1	2019-10-19 15:11:00	NO	2019-10-17 14:31:00	X	YES	NO	NO	NO		NO
1864	50	M	71.38	71	2019-08-07 12:13:00	NO	2019-10-17 14:23:00	X	NO	NO	NO	NO		NO
1865	77	M	0.29	0	2019-10-17 15:50:00	NO	2019-10-17 14:13:00	X	NO	NO	NO	NO		NO	NO	NO	NO	NO		NO
1866	35	F	0.46	0	2019-10-18 10:07:00	NO	2019-10-17 13:58:00	X	NO	NO	NO		NO	NO
1867	85	F	0.01	0	2019-10-17 17:21:00	YES	2019-10-17 11:01:00	X	NO	NO	NO		NO	NO
1868	86	M	15.05	15	2019-11-01 13:08:00	NO	2019-10-17 09:07:00	X	NO	NO	NO	NO		NO
1869	57	F	0.35	0	2019-10-17 08:15:00	YES	2019-10-17 03:02:00	X	NO	NO	NO		NO	NO
1870	25	M	36.61	37	2019-11-23 08:49:00	NO	2019-10-16 23:23:00	X	YES	NO	NO	NO		NO
1871	21	F	71.38	71	2019-08-07 12:26:00	NO	2019-10-16 22:47:00	X	NO	NO	NO		NO	NO
1872	78	M	0.35	0	2019-10-17 04:52:00	YES	2019-10-16 22:32:00	X	NO	NO	NO	NO		NO
1873	55	M	0.73	1	2019-10-16 23:00:00	NO	2019-10-16 21:35:00	X	NO	NO	NO	NO		NO
1874	50	F	23.34	23	2019-09-24 05:45:00	NO	2019-10-16 21:10:00	X	NO	NO	NO		YES	YES
1875	68	F	27.19	27	2019-09-19 17:25:00	NO	2019-10-16 19:55:00	X	NO	NO	NO		NO	NO
1876	69	F	0.52	1	2019-10-17 13:21:00	YES	2019-10-16 19:43:00	X	NO	NO	NO		NO	NO
1877	41	M	0.1	0	2019-10-16 19:45:00	YES	2019-10-16 19:20:00	X	NO	NO	NO	NO		NO
1878	63	M	0.45	0	2019-10-17 08:46:00	NO	2019-10-16 19:12:00	X	YES	NO	NO	YES		YES
1879	66	F	13.5	14	2019-10-03 13:16:00	YES	2019-10-16 17:59:00	X	NO	NO	NO		NO	NO	NO	NO	NO		NO	NO
1880	68	F	41.52	42	2019-09-05 14:09:00	YES	2019-10-16 17:54:00	X	NO	NO	NO		YES	YES
1881	75	M	25.36	25	2019-11-11 10:13:00	YES	2019-10-16 17:26:00	X	NO	NO	NO	NO		NO
1882	63	M	70.37	70	2019-08-08 03:30:00	YES	2019-10-16 16:52:00	X	NO	NO	NO	YES		YES	NO	NO	NO	YES		YES
1883	73	M	12.28	12	2019-10-04 17:54:00	YES	2019-10-16 16:50:00	X	NO	NO	NO	NO		NO
1884	60	F	1.88	2	2019-10-18 17:13:00	YES	2019-10-16 15:22:00	X	NO	NO	NO		NO	NO	NO	NO	NO		NO	NO
1885	81	M	67.63	68	2019-08-10 09:46:00	NO	2019-10-16 15:03:00	X	NO	NO	YES	NO		NO
1886	51	M	67.14	67	2019-12-23 08:09:00	NO	2019-10-16 14:12:00	X	NO	NO	NO	NO		NO	NO	NO	NO	NO		NO
1887	82	F	0.62	1	2019-10-17 00:48:00	NO	2019-10-16 13:14:00	X	NO	NO	NO		NO	NO
1888	49	M	0.13	0	2019-10-16 19:32:00	NO	2019-10-16 13:01:00	X	YES	YES	YES	YES		YES
1889	70	M	0.31	0	2019-10-16 20:46:00	NO	2019-10-16 12:40:00	X	NO	NO	NO	NO		NO
1890	58	F	0.06	0	2019-10-17	NO	2019-10-16 12:13:00	X	NO	NO	NO		NO	NO	NO	NO	NO		NO	NO
1891	44	F	62.34	62	2019-08-15 06:44:00	NO	2019-10-16 11:16:00	X	NO	NO	NO		NO	NO
1892	27	M	0.07	0	2019-10-16 16:38:00	YES	2019-10-16 10:57:00	X	NO	NO	NO	NO		NO
1893	51	F	0.16	0	2019-10-16 20:38:00	NO	2019-10-16 10:54:00	X	NO	NO	NO		NO	NO
1894	43	M	0.08	0	2019-10-16 13:42:00	NO	2019-10-16 10:50:00	X	NO	NO	NO	NO		NO
1895	48	M	31.84	32	2019-09-14 20:53:00	NO	2019-10-16 10:23:00	X	NO	NO	YES	NO		NO
1896	77	F	2.6	3	2019-10-20 02:50:00	NO	2019-10-16 09:23:00	X	NO	NO	NO		NO	NO
1897	21	F	54.52	55	2019-12-10 11:15:00	NO	2019-10-16 08:47:00	X	NO	NO	NO		NO	NO	NO	NO	NO		NO	NO
1898	41	M	0.19	0	2019-10-16 10:42:00	NO	2019-10-16 05:19:00	X	NO	NO	NO	NO		NO
1899	40	M	0.12	0	2019-10-16 13:09:00	NO	2019-10-16 03:29:00	X	NO	NO	NO	NO		NO
1900	37	M	1.12	1	2019-10-17 14:50:00	NO	2019-10-16 03:25:00	X	NO	YES	NO	NO		NO
1901	47	M	0.24	0	2019-10-16 15:49:00	YES	2019-10-16 00:47:00	X	NO	NO	YES	NO		NO
1902	82	F	0.02	0	2019-10-16 05:42:00	NO	2019-10-16 00:30:00	X	NO	NO	NO		NO	NO
1903	50	M	15.16	15	2019-10-01 15:10:00	YES	2019-10-15 23:03:00	X	YES	YES	NO	NO		NO
1904	54	M	5.22	5	2019-10-11 11:42:00	YES	2019-10-15 21:13:00	X	NO	NO	NO	NO		NO
1905	33	M	77.38	77	2020-01-02 19:29:00	NO	2019-10-15 19:11:00	X	NO	NO	NO	NO		NO
1906	76	M	2.93	3	2019-10-19 08:49:00	NO	2019-10-15 19:10:00	X	NO	NO	NO	NO		NO
1907	66	M	1.77	2	2019-10-15 22:21:00	NO	2019-10-15 19:08:00	X	NO	NO	NO	NO		NO
1908	64	F	11.85	12	2019-10-05 00:26:00	NO	2019-10-15 18:55:00	X	NO	NO	YES		NO	NO
1909	60	F	0.45	0	2019-10-16 09:07:00	YES	2019-10-15 17:55:00	X	NO	NO	NO		YES	YES
1910	53	M	4.53	5	2019-10-21 13:43:00	NO	2019-10-15 16:48:00	X	NO	NO	NO	NO		NO
1911	70	M	0.89	1	2019-10-16 00:05:00	NO	2019-10-15 16:27:00	X	NO	NO	NO	NO		NO
1912	55	F	42.29	42	2019-09-03 12:46:00	YES	2019-10-15 16:09:00	X	NO	NO	NO		YES	YES
1913	77	F	0.69	1	2019-10-16 15:50:00	NO	2019-10-15 15:26:00	X	NO	NO	YES		YES	YES
1914	29	F	24.23	24	2019-11-09 23:16:00	NO	2019-10-15 15:24:00	X	NO	NO	NO		NO	NO
1915	70	F	48.85	49	2019-12-04 10:24:00	NO	2019-10-15 14:26:00	X	NO	NO	NO		NO	NO
1916	86	F	0.35	0	2019-10-16 00:27:00	NO	2019-10-15 13:39:00	X	NO	NO	NO		NO	NO
1917	65	M	0.41	0	2019-10-16 09:06:00	YES	2019-10-15 13:32:00	X	NO	NO	NO	NO		NO	NO	NO	NO	NO		NO
1918	80	M	2.39	2	2019-10-18 08:50:00	NO	2019-10-15 13:08:00	X	NO	NO	NO	NO		NO
1919	71	F	0.02	0	2019-10-15 16:34:00	NO	2019-10-15 12:40:00	X	NO	NO	NO		NO	NO
1920	58	F	0.62	1	2019-10-15 18:52:00	NO	2019-10-15 11:13:00	X	NO	NO	NO		NO	NO
1921	61	M	0.15	0	2019-10-15 11:02:00	YES	2019-10-15 11:02:00	X	NO	NO	NO	NO		NO
1922	32	M	0.58	1	2019-10-15 21:45:00	NO	2019-10-15 10:20:00	X	NO	NO	NO	NO		NO
1923	53	M	0.16	0	2019-10-15 16:08:00	NO	2019-10-15 10:01:00	X	NO	NO	NO	NO		NO
1924	69	F	0.92	1	2019-10-16 12:35:00	NO	2019-10-15 07:51:00	X	NO	NO	NO		NO	NO
1925	24	M	10.09	10	2019-10-25 12:52:00	NO	2019-10-15 06:58:00	X	YES	YES	NO	YES		YES
1926	62	M	1.92	2	2019-10-17 17:02:00	NO	2019-10-15 06:45:00	X	NO	NO	NO	NO		NO
1927	74	M	1.46	1	2019-10-17 12:27:00	NO	2019-10-15 04:59:00	X	NO	NO	NO	NO		NO
1928	68	M	75.1	75	2019-08-02 08:12:00	NO	2019-10-14 22:45:00	X	YES	NO	NO	NO		NO
1929	82	F	2.8	3	2019-10-18 09:44:00	YES	2019-10-14 22:36:00	X	YES	YES	NO		NO	NO	YES	YES	NO		NO	NO
1930	64	M	47.91	48	2019-08-28 12:32:00	YES	2019-10-14 21:02:00	X	NO	NO	NO	NO		NO	NO	NO	NO	NO		NO
1931	96	M	0.03	0	2019-10-15 01:02:00	NO	2019-10-14 20:46:00	X	YES	YES	NO	YES		YES
1932	56	F	0.11	0	2019-10-15 10:42:00	NO	2019-10-14 19:57:00	X	NO	NO	NO		NO	NO
1933	38	F	76.49	76	2019-07-30 13:05:00	NO	2019-10-14 19:23:00	X	NO	NO	NO		NO	NO
1934	77	F	1.87	2	2019-10-15 00:21:00	NO	2019-10-14 17:37:00	X	NO	NO	NO		NO	NO
1935	84	F	0.04	0	2019-10-14 19:35:00	NO	2019-10-14 15:32:00	X	NO	NO	NO		NO	NO
1936	71	M	80.51	81	2019-07-26 10:29:00	NO	2019-10-14 14:35:00	X	NO	NO	NO	NO		NO
1937	58	M	11.77	12	2019-10-03 15:43:00	YES	2019-10-14 14:03:00	X	YES	NO	NO	NO		NO
1938	62	M	12.89	13	2019-10-28 08:05:00	NO	2019-10-14 13:51:00	X	NO	NO	NO	NO		NO
1939	73	M	0.77	1	2019-10-14 23:35:00	NO	2019-10-14 13:39:00	X	NO	NO	NO	NO		NO
1940	55	M	8.91	9	2019-10-23 13:16:00	NO	2019-10-14 12:34:00	X	NO	NO	NO	NO		NO
1941	58	F	0.2	0	2019-10-14 17:26:00	NO	2019-10-14 12:28:00	X	NO	NO	YES		NO	NO
1942	70	M	17.38	17	2019-09-27 12:48:00	YES	2019-10-14 11:41:00	X	NO	NO	NO	NO		NO
1943	63	M	33.11	33	2019-09-11 13:50:00	NO	2019-10-14 10:24:00	X	NO	NO	NO	NO		NO
1944	80	F	2.13	2	2019-10-14 15:18:00	YES	2019-10-14 10:09:00	X	YES	YES	YES		YES	YES
1945	59	F	1.95	2	2019-10-14 17:15:00	NO	2019-10-14 09:53:00	X	NO	NO	NO		NO	NO
1946	47	M	0.01	0	2019-10-14 21:04:00	NO	2019-10-14 09:48:00	X	NO	NO	NO	NO		NO
1947	56	M	2.12	2	2019-10-14 12:31:00	YES	2019-10-14 08:57:00	X	NO	NO	NO	NO		NO
1948	61	F	28.14	28	2019-11-11 09:30:00	YES	2019-10-14 05:18:00	X	NO	NO	YES		YES	YES
1949	52	M	1.44	1	2019-10-15 19:45:00	NO	2019-10-14 03:22:00	X	NO	NO	NO	NO		NO
1950	30	F	0.23	0	2019-10-14 10:40:00	NO	2019-10-14 00:31:00	X	NO	NO	NO		NO	NO
1951	64	M	0.42	0	2019-10-14 08:49:00	NO	2019-10-14 00:02:00	X	NO	NO	NO	NO		NO
1952	39	F	23.61	24	2019-09-20 14:20:00	NO	2019-10-13 22:25:00	X	NO	NO	NO		NO	NO
1953	47	M	0.16	0	2019-10-14 02:11:00	NO	2019-10-13 21:16:00	X	NO	NO	NO	NO		NO
1954	49	M	0.18	0	2019-10-13 22:14:00	NO	2019-10-13 19:51:00	X	NO	NO	NO	NO		NO	NO	NO	NO	NO		NO
1955	72	M	0.06	0	2019-10-14 00:49:00	YES	2019-10-13 19:47:00	X	NO	NO	NO	YES		YES
1956	37	M	52.39	52	2019-12-05 09:20:00	NO	2019-10-13 18:45:00	X	NO	NO	NO	NO		NO
1957	33	M	0.37	0	2019-10-14 08:56:00	NO	2019-10-13 18:42:00	X	NO	NO	NO	NO		NO
1958	67	F	19.75	20	2019-09-26 04:20:00	YES	2019-10-13 18:12:00	X	NO	NO	NO		NO	NO	NO	NO	NO		NO	NO
1959	45	M	57.91	58	2019-08-17 03:23:00	NO	2019-10-13 17:52:00	X	NO	NO	NO	NO		NO
1960	63	F	0.07	0	2019-10-13 23:21:00	NO	2019-10-13 17:20:00	X	YES	YES	NO		YES	YES
1961	25	F	2.47	2	2019-10-16 09:19:00	NO	2019-10-13 17:11:00	X	NO	NO	NO		NO	NO
1962	54	M	74.55	75	2019-08-02 14:01:00	YES	2019-10-13 15:17:00	X	NO	NO	NO	NO		NO
1963	77	M	0.11	0	2019-10-14 12:43:00	YES	2019-10-13 13:24:00	X	NO	NO	YES	YES		YES
1964	57	F	34.91	35	2019-11-17 12:13:00	NO	2019-10-13 13:11:00	X	NO	NO	NO		NO	NO
1965	84	M	0.01	0	2019-10-13 19:28:00	NO	2019-10-13 12:40:00	X	NO	NO	NO	NO		NO
1966	62	M	2.78	3	2019-10-16 10:04:00	NO	2019-10-13 12:30:00	X	NO	NO	NO	NO		NO
1967	19	M	0.49	0	2019-10-14 06:41:00	NO	2019-10-13 08:45:00	X	YES	YES	NO	NO		NO	YES	YES	NO	NO		NO
1968	84	M	2.97	3	2019-10-16 11:26:00	YES	2019-10-13 08:33:00	X	NO	NO	YES	NO		NO	NO	NO	YES	NO		NO
1969	76	F	0.3	0	2019-10-13 19:42:00	YES	2019-10-13 07:34:00	X	NO	NO	NO		NO	NO
1970	87	F	0.96	1	2019-10-14 09:58:00	YES	2019-10-13 06:22:00	X	NO	NO	NO		NO	NO
1971	87	F	0.11	0	2019-10-13 08:26:00	NO	2019-10-13 00:11:00	X	NO	NO	NO		NO	NO
1972	53	F	0.12	0	2019-10-13 10:02:00	NO	2019-10-12 23:29:00	X	NO	NO	NO		NO	NO	NO	NO	NO		NO	NO
1973	32	F	76.97	77	2019-07-28 09:18:00	NO	2019-10-12 22:37:00	X	NO	NO	NO		NO	NO
1974	31	M	15.4	15	2019-09-27 14:20:00	NO	2019-10-12 19:48:00	X	YES	YES	NO	YES		YES
1975	39	F	18.19	18	2019-10-31 12:13:00	NO	2019-10-12 19:11:00	X	NO	NO	NO		NO	NO
1976	58	F	0.04	0	2019-10-13 04:12:00	NO	2019-10-12 18:01:00	X	NO	NO	NO		YES	YES
1977	69	M	65.63	66	2019-12-17 11:48:00	YES	2019-10-12 15:55:00	X	NO	NO	NO	NO		NO	NO	NO	NO	NO		NO
1978	73	M	0.07	0	2019-10-12 19:34:00	NO	2019-10-12 11:30:00	X	NO	NO	NO	NO		NO	NO	NO	NO	NO		NO
1979	83	M	20.11	20	2019-09-22 10:16:00	NO	2019-10-12 07:00:00	X	NO	NO	NO	NO		NO	NO	NO	NO	NO		NO
1980	69	M	0.17	0	2019-10-12 11:05:00	YES	2019-10-12 05:50:00	X	NO	NO	YES	NO		NO
1981	55	M	0.04	0	2019-10-12 09:40:00	YES	2019-10-12 03:37:00	X	NO	NO	NO	NO		NO
1982	48	F	66.55	67	2019-08-06 12:23:00	NO	2019-10-11 21:59:00	X	NO	NO	NO		NO	NO
1983	65	F	2.2	2	2019-10-14 10:26:00	NO	2019-10-11 21:48:00	X	NO	NO	YES		NO	NO
1984	48	M	39.58	40	2019-11-20 18:54:00	YES	2019-10-11 21:36:00	X	NO	NO	NO	NO		NO
1985	73	F	2.25	2	2019-10-14 07:13:00	YES	2019-10-11 19:36:00	X	NO	NO	YES		NO	NO
1986	64	F	0.47	0	2019-10-12 13:06:00	NO	2019-10-11 19:15:00	X	NO	NO	NO		NO	NO
1987	35	F	0.53	1	2019-10-12 11:54:00	NO	2019-10-11 18:50:00	X	NO	NO	NO		NO	NO
1988	63	F	0.65	1	2019-10-11 23:11:00	NO	2019-10-11 18:25:00	X	NO	NO	NO		NO	NO
1989	78	M	1.78	2	2019-10-14 14:50:00	YES	2019-10-11 18:16:00	X	NO	NO	YES	NO		NO
1990	73	M	50.29	50	2019-08-22 16:07:00	YES	2019-10-11 17:46:00	X	YES	NO	NO	NO		NO
1991	74	F	69.65	70	2019-12-20 14:23:00	YES	2019-10-11 17:28:00	X	NO	NO	NO		NO	NO
1992	63	M	72.65	73	2019-12-23 12:21:00	NO	2019-10-11 17:05:00	X	NO	NO	NO	NO		NO
1993	60	F	0.61	1	2019-10-12 11:17:00	NO	2019-10-11 16:41:00	X	NO	NO	NO		NO	NO
1994	73	M	9.63	10	2019-10-03 01:54:00	NO	2019-10-11 16:19:00	X	YES	NO	NO	NO		NO	YES	NO	NO	NO		NO
1995	51	F	17.5	18	2019-09-24 10:21:00	YES	2019-10-11 16:02:00	X	NO	NO	NO		NO	NO
1996	84	M	0.05	0	2019-10-12 01:25:00	YES	2019-10-11 15:36:00	X	NO	NO	YES	YES		YES
1997	66	M	0.01	0	2019-10-11 20:03:00	YES	2019-10-11 15:27:00	X	YES	YES	YES	NO		NO
1998	52	F	0.04	0	2019-10-12 16:51:00	YES	2019-10-11 14:48:00	X	NO	NO	NO		NO	NO
1999	74	M	2.03	2	2019-10-13 20:31:00	NO	2019-10-11 14:29:00	X	NO	NO	NO	NO		NO
[truncated: 185 more rows]

## Sheet: QUALITATIVE
AGE				SEX			EKG to ECHO Difference (DAYS)				LVH Criteria Met				LVH by Sex
Age	Number	Percent		Male	Female		Difference	Number	Percent		Criteria	Count	Percent			Male	Female
18	3	0.00137363		1135	1049		0	790	0.361722		Seamens' Sign	190	0.0869963		LVH (+) Count	437	319
19	8	0.003663		% Male	% Female		1	350	0.160256		S-L1	71	0.0325092		LVH (+) %	0.385022	0.304099
20	6	0.00274725		0.519689	0.480311		2	119	0.0544872		S-L2	147	0.0673077		LVH (-) Count	698	730
21	15	0.00686813					3	56	0.025641		Cornell	213	0.0975275		LVH (-) %	0.614978	0.695901
22	9	0.00412088					4	27	0.0123626
23	3	0.00137363					5	21	0.00961538
24	5	0.00228938		LVH			6	23	0.0105311
25	18	0.00824176		YES	NO		7	27	0.0123626
26	3	0.00137363		756	1428		8	18	0.00824176
27	10	0.00457875		% YES	% NO		9	23	0.0105311
28	7	0.00320513		0.346154	0.653846		10	21	0.00961538
29	16	0.00732601					11	17	0.00778388
30	19	0.00869963					12	23	0.0105311
31	14	0.00641026					13	18	0.00824176
32	18	0.00824176					14	20	0.00915751
33	13	0.00595238					15	18	0.00824176
34	11	0.00503663					16	9	0.00412088
35	25	0.0114469					17	7	0.00320513
36	16	0.00732601					18	11	0.00503663
37	18	0.00824176					19	17	0.00778388
38	13	0.00595238					20	16	0.00732601
39	26	0.0119048					21	14	0.00641026
40	16	0.00732601					22	11	0.00503663
41	20	0.00915751					23	21	0.00961538
42	19	0.00869963					24	14	0.00641026
43	25	0.0114469					25	10	0.00457875
44	20	0.00915751					26	21	0.00961538
45	12	0.00549451					27	8	0.003663
46	15	0.00686813					28	12	0.00549451
47	34	0.0155678					29	15	0.00686813
48	30	0.0137363					30	14	0.00641026
49	36	0.0164835					31	12	0.00549451
50	31	0.0141941					32	8	0.003663
51	35	0.0160256					33	16	0.00732601
52	22	0.0100733					34	10	0.00457875
53	30	0.0137363					35	10	0.00457875
54	48	0.021978					36	8	0.003663
55	63	0.0288462					37	6	0.00274725
56	32	0.014652					38	5	0.00228938
57	34	0.0155678					39	12	0.00549451
58	33	0.0151099					40	7	0.00320513
59	57	0.0260989					41	8	0.003663
60	53	0.0242674					42	13	0.00595238
61	43	0.0196886					43	10	0.00457875
62	57	0.0260989					44	14	0.00641026
63	54	0.0247253					45	5	0.00228938
64	66	0.0302198					46	7	0.00320513
65	67	0.0306777					47	11	0.00503663
66	59	0.0270147					48	6	0.00274725
67	62	0.0283883					49	6	0.00274725
68	56	0.025641					50	11	0.00503663
69	55	0.0251832					51	8	0.003663
70	43	0.0196886					52	6	0.00274725
71	39	0.0178571					53	6	0.00274725
72	57	0.0260989					54	3	0.00137363
73	47	0.0215201					55	6	0.00274725
74	38	0.0173993					56	8	0.003663
75	41	0.0187729					57	9	0.00412088
76	44	0.0201465					58	11	0.00503663
77	48	0.021978					59	5	0.00228938
78	24	0.010989					60	4	0.0018315
79	40	0.018315					61	7	0.00320513
80	32	0.014652					62	7	0.00320513
81	32	0.014652					63	6	0.00274725
82	22	0.0100733					64	6	0.00274725
83	26	0.0119048					65	4	0.0018315
84	30	0.0137363					66	2	0.000915751
85	17	0.00778388					67	3	0.00137363
86	16	0.00732601					68	7	0.00320513
87	31	0.0141941					69	9	0.00412088
88	26	0.0119048					70	7	0.00320513
89	16	0.00732601					71	8	0.003663
90	8	0.003663					72	6	0.00274725
91	16	0.00732601					73	3	0.00137363
92	3	0.00137363					74	4	0.0018315
93	5	0.00228938					75	7	0.00320513
94	5	0.00228938					76	3	0.00137363
95	8	0.003663					77	11	0.00503663
96	4	0.0018315					78	5	0.00228938
97	2	0.000915751					79	3	0.00137363
98	2	0.000915751					80	3	0.00137363
99	2	0.000915751					81	8	0.003663
							82	5	0.00228938
							83	3	0.00137363
							84	1	0.000457875
							85	6	0.00274725
							86	7	0.00320513
							87	4	0.0018315
							88	7	0.00320513
							89	5	0.00228938
							90	2	0.000915751
							91	1	0.000457875
							92	2	0.000915751

## Sheet: SENSSPEC
	LVH (+)	LVH (-)			Sensitivity	0.108466	Accuracy	0.641941
Seamens' (+)	82	108	190		Specificity	0.92437	PLR	1.43416
Seamens' (-)	674	1320	1994		PPV	0.431579	NLR	0.964478
	756	1428	2184		NPV	0.661986
	LVH (+)	LVH (-)			Sensitivity	0.047619	Accuracy	0.654304
S-L 1 (+)	36	35	71		Specificity	0.97549	PLR	1.94286
S-L 1 (-)	720	1393	2113		PPV	0.507042	NLR	0.97631
	756	1428	2184		NPV	0.659252
	LVH (+)	LVH (-)			Sensitivity	0.0806878	Accuracy	0.642399
S-L 2 (+)	61	86	147		Specificity	0.939776	PLR	1.33979
S-L 2 (-)	695	1342	2037		PPV	0.414966	NLR	0.978225
	756	1428	2184		NPV	0.658812
	LVH (+)	LVH (-)			Sensitivity	0.128307	Accuracy	0.645147
Cornell (+)	97	116	213		Specificity	0.918768	PLR	1.5795
Cornell (-)	659	1312	1971		PPV	0.455399	NLR	0.948764
	756	1428	2184		NPV	0.665652

## Sheet: MALE SS
	LVH (+)	LVH (-)			Sensitivity	0.116705	Accuracy	0.589427
Seamens' (+)	51	80	131		Specificity	0.885387	PLR	1.01825
Seamens' (-)	386	618	1004		PPV	0.389313	NLR	0.997638
	437	698	1135		NPV	0.615538
	LVH (+)	LVH (-)			Sensitivity	0.0549199	Accuracy	0.612335
S-L 1 (+)	24	27	51		Specificity	0.961318	PLR	1.41978
S-L 1 (-)	413	671	1084		PPV	0.470588	NLR	0.983109
	437	698	1135		NPV	0.619004
	LVH (+)	LVH (-)			Sensitivity	0.0800915	Accuracy	0.60793
S-L 2 (+)	35	43	78		Specificity	0.938395	PLR	1.30009
S-L 2 (-)	402	655	1057		PPV	0.448718	NLR	0.980299
	437	698	1135		NPV	0.619678
	LVH (+)	LVH (-)			Sensitivity	0.0915332	Accuracy	0.615859
Cornell (+)	40	39	79		Specificity	0.944126	PLR	1.63821
Cornell (-)	397	659	1056		PPV	0.506329	NLR	0.96223
	437	698	1135		NPV	0.624053

## Sheet: FEMALE SS
	LVH (+)	LVH (-)			Sensitivity	0.0971787	Accuracy	0.698761
Seamens' (+)	31	28	59		Specificity	0.961644	PLR	2.53359
Seamens' (-)	288	702	990		PPV	0.525424	NLR	0.938831
	319	730	1049		NPV	0.709091
	LVH (+)	LVH (-)			Sensitivity	0.0376176	Accuracy	0.699714
S-L 1 (+)	12	8	20		Specificity	0.989041	PLR	3.4326
S-L 1 (-)	307	722	1029		PPV	0.6	NLR	0.973046
	319	730	1049		NPV	0.701652
	LVH (+)	LVH (-)			Sensitivity	0.0815047	Accuracy	0.679695
S-L 2 (+)	26	43	69		Specificity	0.941096	PLR	1.38368
S-L 2 (-)	293	687	980		PPV	0.376812	NLR	0.975985
	319	730	1049		NPV	0.70102
	LVH (+)	LVH (-)			Sensitivity	0.178683	Accuracy	0.676835
Cornell (+)	57	77	134		Specificity	0.894521	PLR	1.69401
Cornell (-)	262	653	915		PPV	0.425373	NLR	0.918164
	319	730	1049		NPV	0.713661

## Sheet: INTER-RATER CHECKS
Seamens' Sign
YES/YES	YES/NO	NO/YES	NO/NO		Agreement	Disagreement
21	3	1	225		0.984	0.016
S-L1
YES/YES	YES/NO	NO/YES	NO/NO		Agreement	Disagreement
6	1	5	238		0.976	0.024
S-L2
YES/YES	YES/NO	NO/YES	NO/NO		Agreement	Disagreement
15	1	3	231		0.984	0.016
Cornell
YES/YES	YES/NO	NO/YES	NO/NO		Agreement	Disagreement
20	4	4	223		0.972	0.032
